# Supplementary material
Source: PubMed Central journal article supplement (PMC5889334)
Supplement: NIHMS945178-supplement-SI_Computational_Data.pdf [file NIHMS945178-supplement-SI_Computational_Data.pdf]

**The Development of a Unified Enantioselective, Convergent Synthetic Approach  
Toward the Furanobutenolide-Derived Polycyclic Norcembranoid Diterpenes:  
Asymmetric Formation of the Polycyclic Norditerpenoid Carbocyclic Core by  
Tandem Annulation Cascade**

Robert A. Craig, II, Russell C. Smith, Jennifer L. Roizen,  
Amanda C. Jones, Scott C. Virgil, and Brian M. Stoltz\*

*Warren and Katharine Schlinger Laboratory for Chemistry and Chemical Engineering,  
Division of Chemistry and Chemical Engineering, California Institute of Technology, MC  
101-20, Pasadena, CA 91125, U.S.A.*

**Table of Contents**

|                                                                                                     |     |
|-----------------------------------------------------------------------------------------------------|-----|
| Computational Assessment of Isomerization of <i>ent</i> -Isoineleganolide B ( <b><i>ent-9</i></b> ) |     |
| <i>Methods</i>                                                                                      | S2  |
| <i>Table S7. Calculated Ground State Energies for Enone <b><i>ent-9</i></b> and Isomers</i>         | S3  |
| Cartesian Coordinates, Imaginary Frequencies, and Total Energies                                    | S4  |
| Notes & References                                                                                  | S12 |

**Computational Assessment of Isomerization of ent-Isoineleganolide B (*ent-9*)**

As noted in footnote 46 of the manuscript, all calculations were performed with Spartan '10 (Wavefunction, Inc., Irvine, CA). The in vacuo equilibrium geometry for each structure was calculated by a series of sequential calculations as follows: Hartree–Fock computation (equilibrium geometry, 3-21G basis set), DFT (equilibrium geometry, B3LYP/6-31G basis set), DFT (energy, B3LYP/6-311+G\*\* basis set), DFT (equilibrium geometry, B3LYP/6-311+G\*\* basis set). The error from these calculations is  $\pm 0.23$  kcal/mol, thus all energy differences larger than 0.46 kcal/mol were considered significant. Except for molecular mechanics and semi-empirical models, the calculation methods used in Spartan have been documented in the literature.<sup>1</sup> All ground state energies have been expressed relative to the energy of *ent*-ineleganolide (*ent-1*) in the naturally occurring conformation (cf. *ent-1*<sup>ax</sup>, Figure 3, Table S1) as determined on the initial isolation by single crystal X-ray diffraction.<sup>2</sup>

Table S7. Calculated Ground State Energies for Enone *ent-9* and Isomers

| entry | compound                                                                            | relative ground state free energy (kcal/mol)* |
|-------|-------------------------------------------------------------------------------------|-----------------------------------------------|
| 1     | 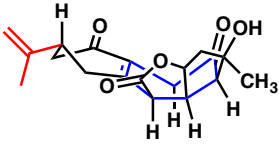   | <i>ent-9<sup>equ</sup></i> 0.8                |
| 2     |    | <i>ent-9<sup>ax</sup></i> 2.1                 |
| 3     |    | <i>ent-9A<sup>equ</sup></i> -1.4              |
| 4     |    | <i>ent-9A<sup>ax</sup></i> 0.7                |
| 5     |  | <i>38<sup>equ</sup></i> 14.1                  |
| 6     |  | <i>38<sup>ax</sup></i> 14.2                   |
| 7     |  | <i>ent-1<sup>equ</sup></i> 1.9                |
| 8     |  | <i>ent-1<sup>ax</sup></i> 0.0                 |

\*: Relative ground state free energies are calculated relative to the energy of *ent-1<sup>ax</sup>* (entry 8) where positive and negative values denote higher and lower relative ground state energies, respectively.

**Cartesian Coordinates and Imaginary Frequencies**ent-9<sup>equ</sup> (entry 1)

# Imaginary Frequencies = 0

Total Energy = -698,839.7 kcal mol<sup>-1</sup>

|   |           |           |           |
|---|-----------|-----------|-----------|
| C | 3.350825  | -1.350522 | -0.163913 |
| C | 3.113162  | 0.063160  | 0.362455  |
| C | 2.059735  | 0.735914  | -0.538993 |
| C | 0.775187  | -0.066689 | -0.663632 |
| C | 0.782710  | -1.416211 | -0.537199 |
| C | 2.064173  | -2.149590 | -0.271385 |
| C | -0.419758 | 0.769080  | -1.099672 |
| C | -1.835385 | 0.187781  | -1.362447 |
| C | -2.481060 | -0.833791 | -0.368913 |
| C | -1.560331 | -1.899935 | 0.217202  |
| C | -0.420132 | -2.330374 | -0.686997 |
| C | -0.707707 | 2.060724  | -0.296999 |
| C | -2.745193 | 1.454941  | -1.242559 |
| C | -3.311413 | 0.002332  | 0.627567  |
| O | -1.956085 | 2.484069  | -0.610233 |
| C | -3.898866 | 1.080936  | -0.309856 |
| O | 2.085864  | -3.369994 | -0.193317 |
| O | 0.018914  | 2.715163  | 0.404356  |
| H | -1.873207 | -0.217172 | -2.376147 |
| C | 4.362410  | 0.921743  | 0.501859  |
| C | 5.532087  | 0.614809  | -0.069246 |
| C | 4.209013  | 2.160588  | 1.353672  |
| O | -1.754482 | -2.411258 | 1.300316  |
| H | -3.074703 | 1.852527  | -2.206651 |
| C | -4.372314 | -0.762236 | 1.416992  |
| O | -2.336730 | 0.580155  | 1.507411  |
| H | -3.199874 | -1.414335 | -0.969993 |
| H | 4.052096  | -1.922882 | 0.450262  |
| H | 1.819633  | 1.730711  | -0.164907 |
| H | 2.488171  | 0.873476  | -1.546047 |
| H | -0.103520 | 1.193864  | -2.071262 |
| H | -0.107998 | -3.337925 | -0.406956 |
| H | -4.279723 | 1.957344  | 0.225892  |
| H | -4.728918 | 0.656877  | -0.888698 |
| H | 6.400425  | 1.257678  | 0.050745  |
| H | 5.681100  | -0.279490 | -0.666225 |
| H | 3.415506  | 2.822322  | 0.983999  |
| H | 3.933088  | 1.892381  | 2.382698  |
| H | 5.138826  | 2.736084  | 1.390438  |
| H | -3.892757 | -1.501338 | 2.059956  |
| H | -4.950967 | -0.066234 | 2.037951  |
| H | -5.076284 | -1.271764 | 0.748299  |
| H | -2.766390 | 1.270821  | 2.036556  |
| H | -0.758231 | -2.351118 | -1.732175 |
| H | 3.779085  | -1.302223 | -1.177252 |
| H | 2.661942  | -0.020648 | 1.363638  |

ent-9<sup>ax</sup> (entry 2)

# Imaginary Frequencies = 0

Total Energy = -698,838.4 kcal mol<sup>-1</sup>

|   |           |           |           |
|---|-----------|-----------|-----------|
| C | 3.112859  | -0.848771 | 1.296365  |
| C | 3.246176  | 0.618393  | 0.841632  |
| C | 1.831049  | 1.206359  | 0.757249  |
| C | 0.817609  | 0.351114  | 0.011799  |
| C | 1.034190  | -0.966705 | -0.217301 |
| C | 2.245359  | -1.645337 | 0.342901  |
| C | -2.365785 | 1.143322  | -0.524878 |
| C | -1.575754 | 0.515270  | -1.270709 |
| C | -2.206678 | -0.833639 | -0.797332 |
| C | -1.247027 | -1.941346 | -0.373826 |
| C | 0.126851  | -1.881383 | -1.018699 |
| C | -1.023566 | 2.117319  | 0.480584  |
| C | -2.710567 | 1.567812  | -1.023521 |
| C | -3.329357 | -0.452754 | 0.191489  |
| O | -2.248650 | 2.458638  | 0.010519  |
| C | -3.922724 | 0.790639  | -0.503563 |
| O | 2.511567  | -2.805968 | 0.065132  |
| O | -0.564071 | 2.627570  | 1.467725  |
| H | -1.341334 | 0.450378  | -2.335758 |
| C | 4.110162  | 0.764647  | -0.408472 |
| C | 3.682586  | 1.300664  | -1.556151 |
| C | 5.540088  | 0.291140  | -0.268452 |
| O | -1.570184 | -2.833075 | 0.383354  |
| H | -2.933972 | 2.184853  | -1.898279 |
| C | -4.363353 | -1.539972 | 0.478674  |
| O | -2.634304 | -0.075311 | 1.388964  |
| H | -2.705332 | -1.254423 | -1.685723 |
| H | 4.072308  | -1.360760 | 1.396014  |
| H | 2.627564  | -0.868210 | 2.283341  |
| H | 3.776471  | 1.157916  | 1.640812  |
| H | 1.453575  | 1.369343  | 1.773904  |
| H | 1.860108  | 2.207457  | 0.314243  |
| H | 0.080996  | 1.850455  | -1.248200 |
| H | 0.567064  | -2.879867 | -1.014954 |
| H | -4.536989 | 1.406680  | 0.162612  |
| H | -4.555395 | 0.477880  | -1.343642 |
| H | 4.348449  | 1.408951  | -2.408461 |
| H | 2.666241  | 1.652240  | -1.701913 |
| H | 6.014126  | 0.715651  | 0.627043  |
| H | 5.601048  | -0.800416 | -0.170938 |
| H | 6.138801  | 0.578257  | -1.137785 |
| H | -3.884851 | -2.387694 | 0.970776  |
| H | -5.153645 | -1.143833 | 1.130016  |
| H | -4.841522 | -1.889843 | -0.444128 |
| H | -3.264335 | 0.345468  | 1.995532  |
| H | 0.043049  | -1.535946 | -2.056793 |

ent-9A<sup>equ</sup> (entry 3)

# Imaginary Frequencies = 0

Total Energy = -698,841.9 kcal mol<sup>-1</sup>

|   |           |           |           |
|---|-----------|-----------|-----------|
| C | 3.215367  | -1.483695 | -0.031586 |
| C | 3.441522  | 0.020758  | 0.144190  |
| C | 2.268289  | 0.774554  | -0.514557 |
| C | 0.902082  | 0.235561  | -0.145212 |
| C | 0.723081  | -0.990161 | 0.393727  |
| C | 1.882406  | -1.921620 | 0.552095  |
| C | -0.234972 | 1.203649  | -0.399874 |
| C | -1.503284 | 0.808529  | -1.185392 |
| C | -2.279946 | -0.528923 | -0.935608 |
| C | -1.588241 | -1.731718 | -0.284423 |
| C | -0.617217 | -1.515329 | 0.864305  |
| C | -0.794865 | 1.916807  | 0.843101  |
| C | -2.483657 | 1.940697  | -0.758595 |
| C | -3.588428 | -0.147276 | -0.160947 |
| O | -2.031145 | 2.397576  | 0.538763  |
| C | -3.857775 | 1.293048  | -0.640823 |
| O | 1.758226  | -3.007218 | 1.098216  |
| O | -0.258300 | 2.110987  | 1.900337  |
| H | -1.288967 | 0.872181  | -2.255566 |
| C | 4.787057  | 0.534365  | -0.347079 |
| C | 5.613177  | -0.186225 | -1.112782 |
| C | 5.154430  | 1.932609  | 0.095016  |
| O | -1.868245 | -2.847261 | -0.682968 |
| H | -2.470896 | 2.805792  | -1.430103 |
| C | -4.742249 | -1.116821 | -0.413670 |
| O | -3.242828 | -0.152664 | 1.231049  |
| H | -2.605075 | -0.898323 | -1.912807 |
| H | 4.002269  | -2.079398 | 0.438670  |
| H | 3.383293  | 0.238652  | 1.222654  |
| H | 2.302246  | 1.836331  | -0.239393 |
| H | 2.386048  | 0.744497  | -1.610971 |
| H | 0.192337  | 2.036736  | -0.980313 |
| H | -1.065867 | -0.821142 | 1.581606  |
| H | -0.457373 | -2.480971 | 1.346759  |
| H | -4.522525 | 1.847362  | 0.031728  |
| H | -4.329689 | 1.273442  | -1.631203 |
| H | 6.566346  | 0.218211  | -1.444493 |
| H | 5.386656  | -1.198299 | -1.433600 |
| H | 4.436617  | 2.680898  | -0.265711 |
| H | 5.160463  | 2.009903  | 1.190727  |
| H | 6.144740  | 2.218810  | -0.271146 |
| H | -4.459287 | -2.128960 | -0.112391 |
| H | -5.623676 | -0.816115 | 0.166706  |
| H | -5.027092 | -1.138025 | -1.471254 |
| H | -3.957948 | 0.275028  | 1.727713  |
| H | 3.205060  | -1.740822 | -1.102107 |

ent-9A<sup>ax</sup> (entry 4)

# Imaginary Frequencies = 0

Total Energy = -698,839.8 kcal mol<sup>-1</sup>

|   |           |           |           |
|---|-----------|-----------|-----------|
| C | -3.505679 | -0.155535 | 1.250167  |
| C | -3.502826 | -0.879562 | -0.112949 |
| C | -2.169061 | -1.628952 | -0.254213 |
| C | -0.935237 | -0.835699 | 0.125109  |
| C | -0.988510 | 0.270049  | 0.898887  |
| C | -2.294931 | 0.743919  | 1.447102  |
| C | 0.369261  | -1.427473 | -0.365626 |
| C | 1.369093  | -0.608456 | -1.210496 |
| C | 1.786892  | 0.854605  | -0.835003 |
| C | 0.926609  | 1.711723  | 0.104437  |
| C | 0.228387  | 1.077596  | 1.297535  |
| C | 1.265713  | -2.065375 | 0.710011  |
| C | 2.658340  | -1.463282 | -1.053678 |
| C | 3.261979  | 0.776402  | -0.307037 |
| O | 2.530843  | -2.150036 | 0.214942  |
| C | 3.817861  | -0.477560 | -1.012285 |
| O | -2.381243 | 1.776313  | 2.094479  |
| O | 0.953731  | -2.497849 | 1.786629  |
| H | 1.037184  | -0.604096 | -2.252250 |
| C | -3.850389 | 0.060016  | -1.265656 |
| C | -2.975400 | 0.460344  | -2.193665 |
| C | -5.292629 | 0.510085  | -1.313897 |
| O | 0.860515  | 2.907818  | -0.109081 |
| H | 2.770493  | -2.229662 | -1.828083 |
| C | 4.064841  | 2.049361  | -0.574382 |
| O | 3.162537  | 0.549287  | 1.105587  |
| H | 1.825327  | 1.428152  | -1.765592 |
| H | -4.403176 | 0.446187  | 1.412079  |
| H | -3.477217 | -0.909350 | 2.051753  |
| H | -4.301075 | -1.635548 | -0.081960 |
| H | -2.193224 | -2.524023 | 0.388349  |
| H | -2.062082 | -2.004044 | -1.279970 |
| H | 0.110164  | -2.287003 | -1.002902 |
| H | 0.945311  | 0.448159  | 1.835417  |
| H | -0.096614 | 1.889745  | 1.949577  |
| H | 4.699786  | -0.891684 | -0.510019 |
| H | 4.108599  | -0.231457 | -2.041510 |
| H | -3.275052 | 1.124128  | -3.000381 |
| H | -1.931472 | 0.163366  | -2.183623 |
| H | -5.972945 | -0.351638 | -1.361226 |
| H | -5.572798 | 1.082587  | -0.420518 |
| H | -5.482874 | 1.142479  | -2.185853 |
| H | 3.576091  | 2.909822  | -0.109277 |
| H | 5.074789  | 1.954645  | -0.155752 |
| H | 4.162173  | 2.245180  | -1.647835 |
| H | 4.041654  | 0.316559  | 1.442974  |

38<sup>equ</sup> (entry 5)

# Imaginary Frequencies = 0

Total Energy = -698,826.4 kcal mol<sup>-1</sup>

|   |           |           |           |
|---|-----------|-----------|-----------|
| C | -3.064381 | -1.102350 | 0.505180  |
| C | -2.524302 | -0.096122 | -0.528308 |
| C | -1.404759 | 0.780300  | 0.105603  |
| C | -0.598005 | 0.003889  | 1.194014  |
| C | -0.566757 | -1.471306 | 0.880474  |
| C | -1.959019 | -2.075128 | 0.902238  |
| C | 0.730177  | 0.662520  | 1.692504  |
| C | 2.147334  | 0.368518  | 1.136259  |
| C | 2.469393  | -0.692035 | 0.066813  |
| C | 1.830614  | -2.073679 | 0.142222  |
| C | 0.422046  | -2.309762 | 0.513967  |
| C | 0.605159  | 2.187544  | 1.575049  |
| C | 2.599426  | 1.710231  | 0.482709  |
| C | 2.323359  | 0.000116  | -1.321491 |
| O | 1.594253  | 2.692594  | 0.789181  |
| C | 2.768078  | 1.461637  | -1.030368 |
| O | -2.168884 | -3.247483 | 1.150231  |
| O | -0.245796 | 2.886439  | 2.061708  |
| H | 2.775995  | 0.159651  | 2.006732  |
| C | -3.581346 | 0.770275  | -1.192823 |
| C | -4.843463 | 0.857743  | -0.760238 |
| C | -3.112806 | 1.554565  | -2.396977 |
| O | 2.510069  | -3.039324 | -0.191348 |
| H | 3.528339  | 2.087093  | 0.919884  |
| C | 3.145832  | -0.676185 | -2.419033 |
| O | 0.931104  | -0.057323 | -1.663677 |
| H | 3.541322  | -0.899558 | 0.164934  |
| H | -3.428718 | -0.580235 | 1.402131  |
| H | -3.899513 | -1.690554 | 0.115283  |
| H | -2.047825 | -0.688687 | -1.325167 |
| H | -0.727382 | 1.131838  | -0.672462 |
| H | -1.857067 | 1.652096  | 0.586234  |
| H | 0.759736  | 0.446455  | 2.765212  |
| H | 0.144898  | -3.355136 | 0.392236  |
| H | 2.178780  | 2.178594  | -1.610798 |
| H | 3.817704  | 1.597305  | -1.312523 |
| H | -5.565170 | 1.499020  | -1.259742 |
| H | -5.210770 | 0.305947  | 0.099285  |
| H | -2.322100 | 2.269201  | -2.132987 |
| H | -2.694328 | 0.887293  | -3.163714 |
| H | -3.933627 | 2.118108  | -2.850260 |
| H | 2.823640  | -1.711953 | -2.556372 |
| H | 3.022666  | -0.141002 | -3.370342 |
| H | 4.213382  | -0.679538 | -2.176293 |
| H | 0.832840  | 0.298447  | -2.561480 |
| H | -1.238244 | 0.071765  | 2.084695  |



38<sup>ax</sup> (entry 6)

# Imaginary Frequencies = 0

Total Energy = -698,826.3 kcal mol<sup>-1</sup>

|   |           |           |           |
|---|-----------|-----------|-----------|
| C | 2.415399  | -1.748296 | 1.088012  |
| C | 2.546440  | -0.219546 | 1.247441  |
| C | 1.185852  | 0.452805  | 0.906109  |
| C | 0.772690  | 0.082006  | -0.543990 |
| C | 0.536157  | -1.409390 | -0.601686 |
| C | 1.760929  | -2.211508 | -0.212195 |
| C | -0.256713 | 0.980457  | -1.297160 |
| C | -1.790913 | 0.857396  | -1.181098 |
| C | -2.510845 | -0.347663 | -0.562177 |
| C | -2.005738 | -1.755981 | -0.871351 |
| C | -0.578392 | -2.138344 | -0.808998 |
| C | -0.006132 | 2.450297  | -0.928825 |
| C | -2.193284 | 2.047828  | -0.280346 |
| C | -2.703999 | -0.056699 | 0.972006  |
| O | -1.109556 | 2.994600  | -0.342316 |
| C | -2.416787 | 1.472170  | 1.129728  |
| O | 2.125212  | -3.204060 | -0.813429 |
| O | 1.011104  | 3.077941  | -1.079217 |
| H | -2.182359 | 1.015763  | -2.190982 |
| C | 3.708424  | 0.393348  | 0.471638  |
| C | 4.449345  | -0.292936 | -0.408032 |
| C | 3.991601  | 1.853029  | 0.748454  |
| O | -2.833810 | -2.628733 | -1.104492 |
| H | -3.079631 | 2.569645  | -0.650474 |
| C | -4.111513 | -0.454050 | 1.425927  |
| O | -1.744076 | -0.840857 | 1.696726  |
| H | -3.520174 | -0.347232 | -0.986825 |
| H | 3.369850  | -2.267906 | 1.207309  |
| H | 2.736876  | -0.017277 | 2.312225  |
| H | 0.423574  | 0.111304  | 1.611515  |
| H | 1.282037  | 1.536860  | 1.005431  |
| H | 0.010511  | 0.876384  | -2.353432 |
| H | -0.457321 | -3.218948 | -0.850018 |
| H | -1.498541 | 1.599915  | 1.709654  |
| H | -3.218377 | 1.994175  | 1.662097  |
| H | 5.274001  | 0.184070  | -0.932078 |
| H | 4.275087  | -1.336454 | -0.649849 |
| H | 3.210363  | 2.501058  | 0.332239  |
| H | 4.039873  | 2.053528  | 1.827415  |
| H | 4.943113  | 2.158218  | 0.303201  |
| H | -4.295049 | -1.509924 | 1.204243  |
| H | -4.227479 | -0.294235 | 2.506620  |
| H | -4.877877 | 0.144884  | 0.921449  |
| H | -1.992043 | -0.811865 | 2.634744  |
| H | 1.690656  | 0.250587  | -1.126125 |
| H | 1.746783  | -2.113202 | 1.882712  |

ent-1<sup>equ</sup> (entry 7)

# Imaginary Frequencies = 0

Total Energy = -698,838.6 kcal mol<sup>-1</sup>

|   |           |           |           |
|---|-----------|-----------|-----------|
| C | 2.771812  | -1.524254 | 0.139160  |
| C | 3.101931  | -0.030238 | 0.267683  |
| C | 2.054611  | 0.830325  | -0.496571 |
| C | 0.641647  | 0.185408  | -0.573810 |
| C | 0.347695  | -0.737652 | 0.633630  |
| C | 1.416963  | -1.841845 | 0.747603  |
| C | -0.427410 | 1.284859  | -0.816817 |
| C | -1.860337 | 0.936631  | -1.336309 |
| C | -2.475827 | -0.494642 | -1.141498 |
| C | -1.466773 | -1.589609 | -0.857703 |
| C | -1.058320 | -1.371277 | 0.601487  |
| C | -0.662131 | 2.181468  | 0.403309  |
| C | -2.782265 | 1.889904  | -0.495182 |
| C | -3.180643 | -0.405988 | 0.224717  |
| O | -1.944474 | 2.610086  | 0.427955  |
| C | -3.766136 | 1.003855  | 0.280938  |
| O | 1.192576  | -2.891263 | 1.318165  |
| O | 0.144708  | 2.544100  | 1.223957  |
| H | -1.913421 | 1.181134  | -2.399190 |
| C | 4.517052  | 0.347058  | -0.145723 |
| C | 5.332203  | -0.473650 | -0.816648 |
| C | 4.955780  | 1.738249  | 0.248351  |
| O | -1.062258 | -2.453747 | -1.601957 |
| H | -3.286495 | 2.642837  | -1.106261 |
| C | -4.175763 | -1.519404 | 0.541037  |
| O | -2.041194 | -0.466218 | 1.132450  |
| H | -3.127366 | -0.753423 | -1.979706 |
| H | 0.409517  | -0.149887 | 1.561215  |
| H | 3.007124  | 0.225173  | 1.334639  |
| H | 0.011642  | 1.959033  | -1.566843 |
| H | 2.738637  | -1.821673 | -0.920547 |
| H | 3.517205  | -2.159431 | 0.625807  |
| H | 1.982857  | 1.807647  | -0.016589 |
| H | 2.405018  | 0.990770  | -1.524740 |
| H | -1.044582 | -2.309717 | 1.164111  |
| H | -3.894738 | 1.360376  | 1.306884  |
| H | -4.748316 | 1.006002  | -0.206101 |
| H | 6.332271  | -0.158664 | -1.103856 |
| H | 5.048719  | -1.481054 | -1.105480 |
| H | 4.314475  | 2.508507  | -0.199178 |
| H | 4.893996  | 1.875772  | 1.336481  |
| H | 5.986158  | 1.934499  | -0.062235 |
| H | -4.547539 | -1.407256 | 1.564594  |
| H | -5.029497 | -1.490149 | -0.145328 |
| H | -3.711031 | -2.508235 | 0.458753  |
| H | 0.635978  | -0.451113 | -1.466907 |

ent-1<sup>ax</sup> (entry 8)

# Imaginary Frequencies = 0

Total Energy = -698,840.5 kcal mol<sup>-1</sup>

|   |           |           |           |
|---|-----------|-----------|-----------|
| C | -2.957152 | 0.273839  | 1.630853  |
| C | -3.233628 | -0.701832 | 0.467457  |
| C | -1.946916 | -1.514907 | 0.177280  |
| C | -0.752165 | -0.607755 | -0.171175 |
| C | -0.446718 | 0.376873  | 0.994625  |
| C | -1.708093 | 1.122290  | 1.454386  |
| C | 0.479012  | -1.444776 | -0.613018 |
| C | 1.678576  | -0.788986 | -1.372676 |
| C | 1.956267  | 0.753374  | -1.290509 |
| C | 0.786460  | 1.601046  | -0.826687 |
| C | 0.703935  | 1.353191  | 0.682912  |
| C | 1.124391  | -2.236756 | 0.527462  |
| C | 2.931458  | -1.462839 | -0.709145 |
| C | 2.897918  | 0.896823  | -0.079970 |
| O | 2.460843  | -2.328303 | 0.340426  |
| C | 3.794483  | -0.339544 | -0.118069 |
| O | -1.694082 | 2.308156  | 1.729102  |
| O | 0.574724  | -2.776963 | 1.456155  |
| H | 1.606529  | -1.058491 | -2.428375 |
| C | -3.811756 | -0.052813 | -0.785490 |
| C | -3.808561 | 1.265991  | -1.015372 |
| C | -4.435855 | -1.007981 | -1.778726 |
| O | 0.088818  | 2.338070  | -1.484157 |
| H | 3.490008  | -2.096489 | -1.403026 |
| C | 3.651672  | 2.220177  | 0.030192  |
| O | 1.964154  | 0.750378  | 1.029137  |
| H | 2.366334  | 1.122329  | -2.233756 |
| H | -0.127215 | -0.223672 | 1.860146  |
| H | -3.985788 | -1.422230 | 0.822513  |
| H | 0.079007  | -2.219286 | -1.283340 |
| H | -3.802201 | 0.939234  | 1.825225  |
| H | -1.700048 | -2.132186 | 1.046471  |
| H | -2.125070 | -2.207206 | -0.654150 |
| H | 0.552761  | 2.290559  | 1.226878  |
| H | 4.170378  | -0.609032 | 0.873048  |
| H | 4.656700  | -0.141315 | -0.765665 |
| H | -4.236353 | 1.672467  | -1.928660 |
| H | -3.391046 | 1.991915  | -0.325890 |
| H | -3.716830 | -1.748071 | -2.154644 |
| H | -5.252625 | -1.577219 | -1.313671 |
| H | -4.843305 | -0.473192 | -2.641443 |
| H | 4.227009  | 2.243895  | 0.961285  |
| H | 4.343500  | 2.350128  | -0.809645 |
| H | 2.965110  | 3.073798  | 0.037494  |
| H | -1.058460 | -0.011654 | -1.040134 |
| H | -2.794029 | -0.327480 | 2.538047  |

---

**Notes & References**

1. Shao, Y.; Molnar, L. F.; Jung, Y.; Kussmann, J.; Ochsenfeld, C.; Brown, S. T.; Gilbert, A. T. B.; Slipchenko, L. V.; Levchenko, S. V.; O'Neill, D. P.; DiStasio, Jr., R. A.; Lochan, R. C.; Wang, T.; Beran, G. J. O.; Besley, N. A.; Herbert, J. M.; Lin, C. Y.; Van Voorhis, T.; Chien, S. H.; Sodt, A.; Steele, R. P.; Rassolov, V. A.; Maslen, P. E.; Korambath, P. P.; Adamson, R. D.; Austin, B.; Baker, J.; Byrd, E. F. C.; Dachsel, H.; Doerksen, R. J.; Dreuw, A.; Dunietz, B. D.; Dutoi, A. D.; Furlani, T. R.; Gwaltney, S. R.; Heyden, A.; Hirata, S.; Hsu, C-P.; Kedziora, G.; Khalliulin, R. Z.; Klunzinger, P. Lee, A. M.; Lee, M. S.; Liang, W. Z.; Lotan, I.; Nair, N.; Peters, B.; Proynov, E. I.; Pieniazek, P. A.; Rhee, Y. M.; Ritchie, J.; Rosta, E; Sherrill, C. D.; Simmonett, A. C.; Subotnik, J. E.; Woodcock, III, H. L.; Zhang, W.; Bell, A. T.; Chakraborty, A. K.; Chipman, D. M.; Keil, F. J.; Warshel, A.; Hehre, W. J.; Schaefer, H. F.; Kong, J.; Krylov, A. I.; Gill, P. M. W.; Head-Gordon M. *Phys. Chem. Chem. Phys.* **2006**, *8*, 3172–3191.
2. Duh, C.-Y.; Wang, S.-K.; Chia, M.-C.; Chiang, M. Y. *Tetrahedron Lett.* **1999**, *40*, 6033–6035.
