# Supplementary material
Source: PubMed Central journal article supplement (PMC5889334)
Supplement: NIHMS945178-supplement-SI_Spectra.pdf [file NIHMS945178-supplement-SI_Spectra.pdf]

**The Development of a Unified Enantioselective, Convergent Synthetic Approach  
Toward the Furanobutenolide-Derived Polycyclic Norcembranoid Diterpenes:  
Asymmetric Formation of the Polycyclic Norditerpenoid Carbocyclic Core by  
Tandem Annulation Cascade**

Robert A. Craig, II, Russell C. Smith, Jennifer L. Roizen,  
Amanda C. Jones, Scott C. Virgil, and Brian M. Stoltz\*

*Warren and Katharine Schlinger Laboratory for Chemistry and Chemical Engineering,  
Division of Chemistry and Chemical Engineering, California Institute of Technology, MC  
101-20, Pasadena, CA 91125, U.S.A.*

**Table of Contents**

|                                                                                                                                 |     |
|---------------------------------------------------------------------------------------------------------------------------------|-----|
| <sup>1</sup> H, <sup>13</sup> C, and IR spectra for Diene <b>67</b>                                                             | S3  |
| <sup>1</sup> H, <sup>13</sup> C, and IR spectra for Diol <i>ent-18</i>                                                          | S5  |
| <sup>1</sup> H, <sup>13</sup> C, and IR spectra for Ethyl Ester <b>32</b>                                                       | S7  |
| <sup>1</sup> H, <sup>13</sup> C, and IR spectra for $\alpha$ -Diazoester <i>ent-16</i>                                          | S9  |
| <sup>1</sup> H, <sup>13</sup> C, and IR spectra for Diene <b>34</b>                                                             | S11 |
| <sup>1</sup> H, <sup>13</sup> C, and IR spectra for Enone <b>35</b>                                                             | S13 |
| <sup>1</sup> H, <sup>13</sup> C, and IR spectra for <i>ent</i> -Isoineleganolide A ( <b>36</b> )                                | S15 |
| <sup>1</sup> H, <sup>13</sup> C, and IR spectra for Silyl Ether <b>37</b>                                                       | S17 |
| <sup>1</sup> H, <sup>13</sup> C, IR, <sup>19</sup> F, and <sup>19</sup> F – <sup>13</sup> C HSQC spectra for Triflate <b>39</b> | S19 |
| <sup>1</sup> H, <sup>13</sup> C, and IR spectra for Diol <b>44</b>                                                              | S23 |
| <sup>1</sup> H, <sup>13</sup> C, and IR spectra for Diol <b>45</b> , Diastereomer A                                             | S25 |
| <sup>1</sup> H, <sup>13</sup> C, and IR spectra for Diol <b>45</b> , Diastereomer B                                             | S27 |
| <sup>1</sup> H, <sup>13</sup> C, and IR spectra for Methyl Ketone <b>46</b>                                                     | S29 |
| <sup>1</sup> H, <sup>13</sup> C, and IR spectra for Methyl Ketone Diol <i>ent-43</i>                                            | S31 |
| <sup>1</sup> H, <sup>13</sup> C, and IR spectra for Methyl Ketone $\alpha$ -Diazoester <b>48</b>                                | S33 |

|                                                                                                      |     |
|------------------------------------------------------------------------------------------------------|-----|
| <sup>1</sup> H, <sup>13</sup> C, and IR spectra for Pyrazole <b>49</b>                               | S35 |
| <sup>1</sup> H, <sup>13</sup> C, and IR spectra for Ethyl Ether <b>52</b>                            | S37 |
| <sup>1</sup> H, <sup>13</sup> C, and IR spectra for Cycloheptatriene <b>53</b>                       | S39 |
| <sup>1</sup> H, <sup>13</sup> C, and IR spectra for Bromide <b>54</b>                                | S41 |
| <sup>1</sup> H, <sup>13</sup> C, and IR spectra for Ketopyran <b>55</b>                              | S43 |
| <sup>1</sup> H, <sup>13</sup> C, and IR spectra for Hemiketal <b>57</b> / Hydroxyketone <b>58</b>    | S45 |
| <sup>1</sup> H, <sup>13</sup> C, and IR spectra for <i>ent-epi</i> -Isoineleganolide B ( <b>59</b> ) | S51 |
| <sup>1</sup> H, <sup>13</sup> C, and IR spectra for <i>ent</i> -Isoineleganolide C ( <b>60</b> )     | S53 |
| <sup>1</sup> H, <sup>13</sup> C, and IR spectra for Bisenone <b>61</b>                               | S55 |



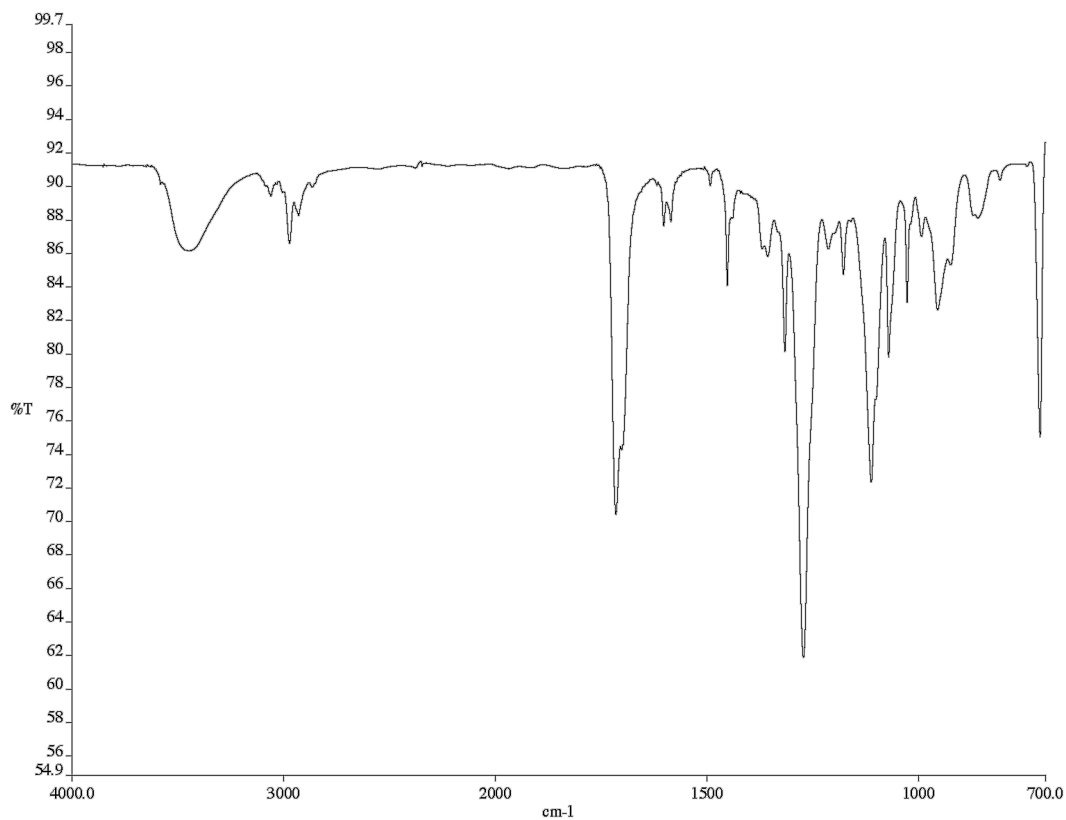

Infrared spectrum (Thin Film, NaCl) of compound **67**.

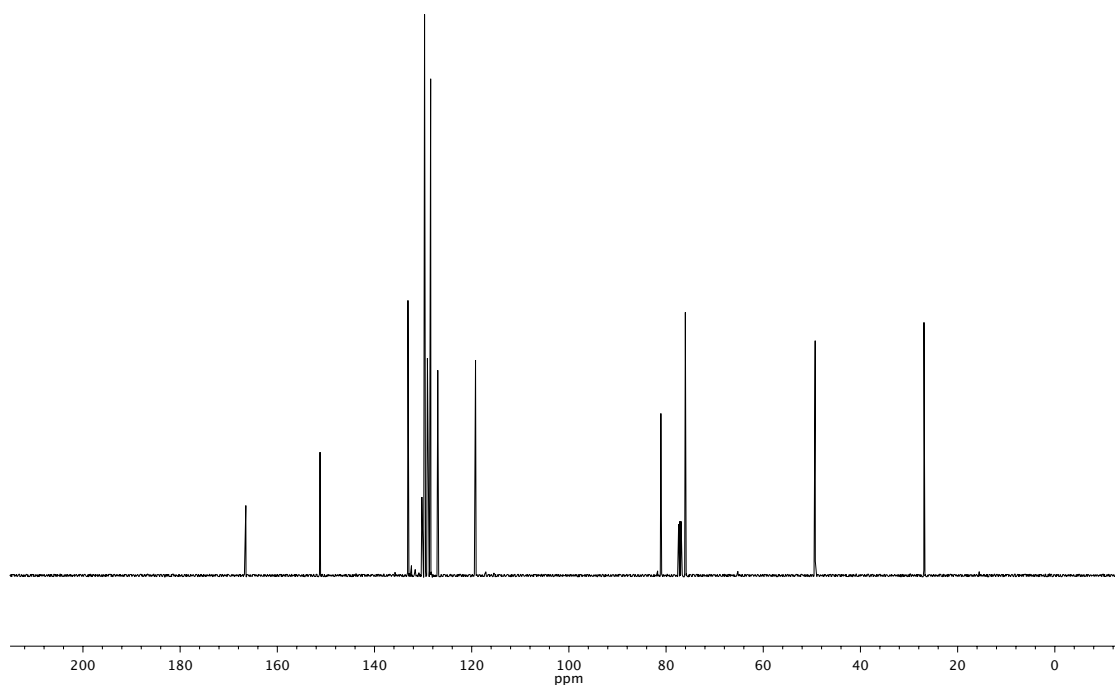

<sup>13</sup>C NMR (126 MHz, CDCl<sub>3</sub>) of compound **67**.

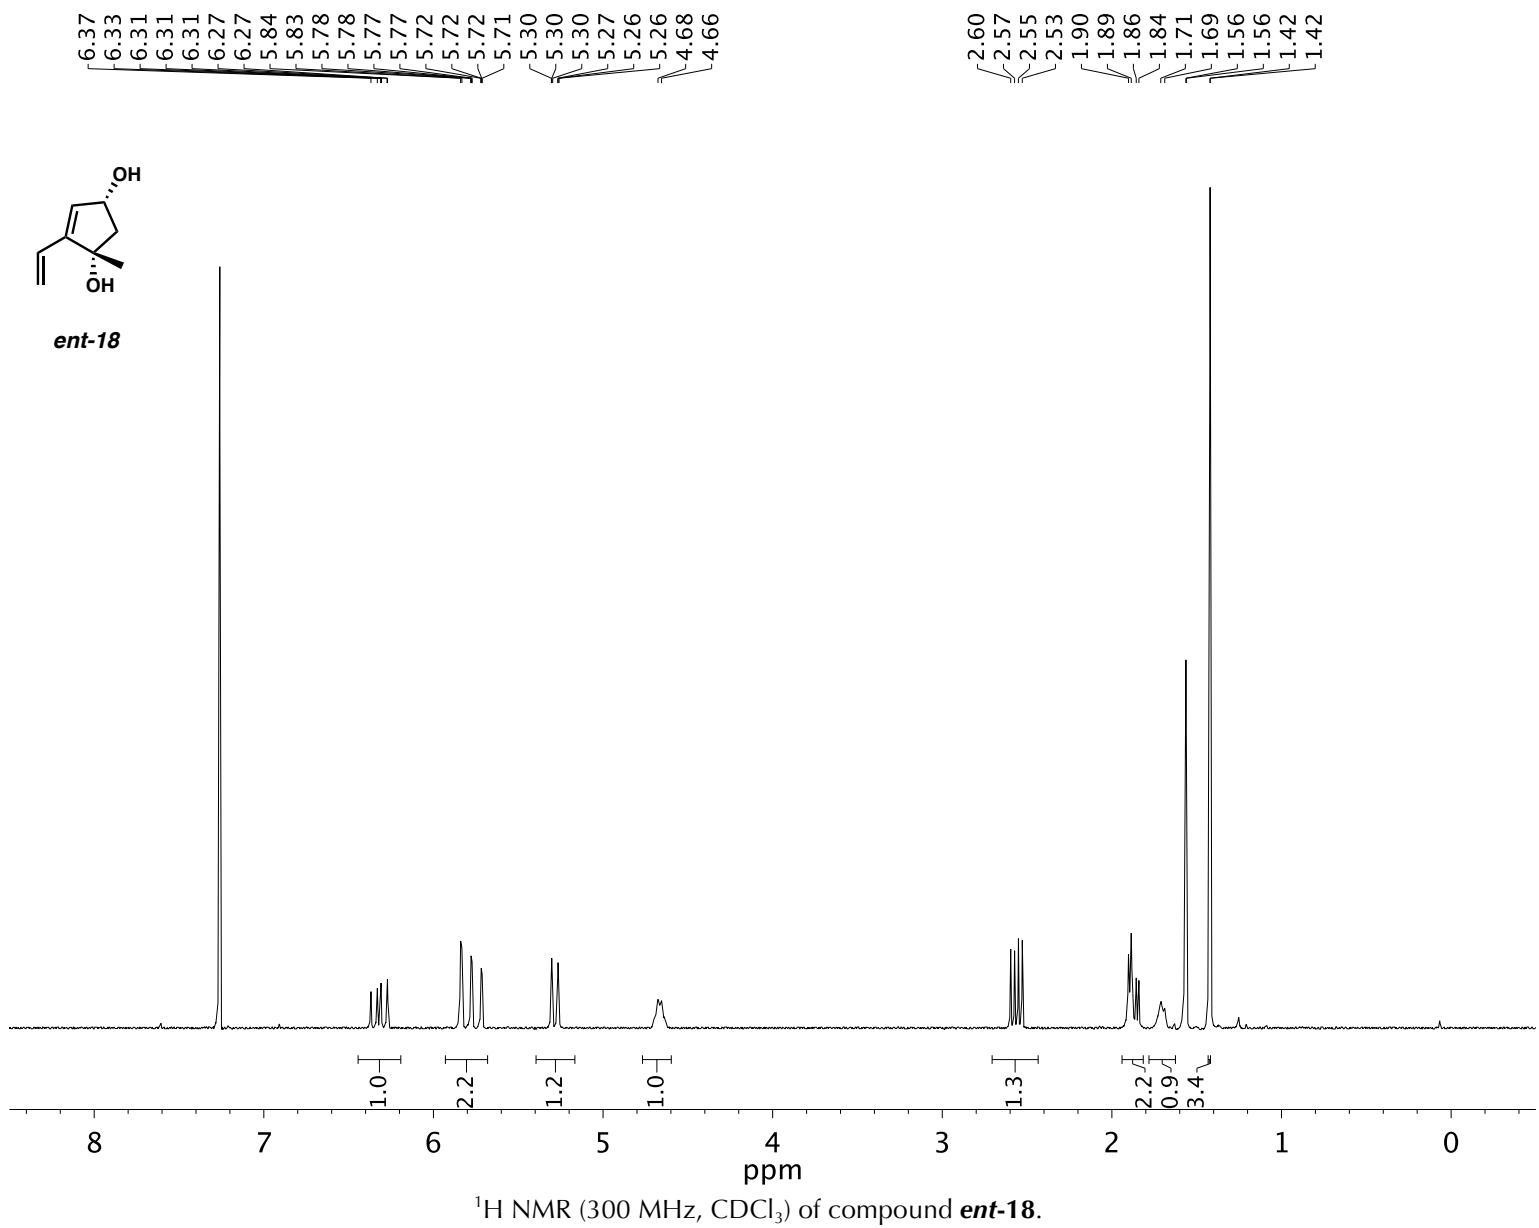

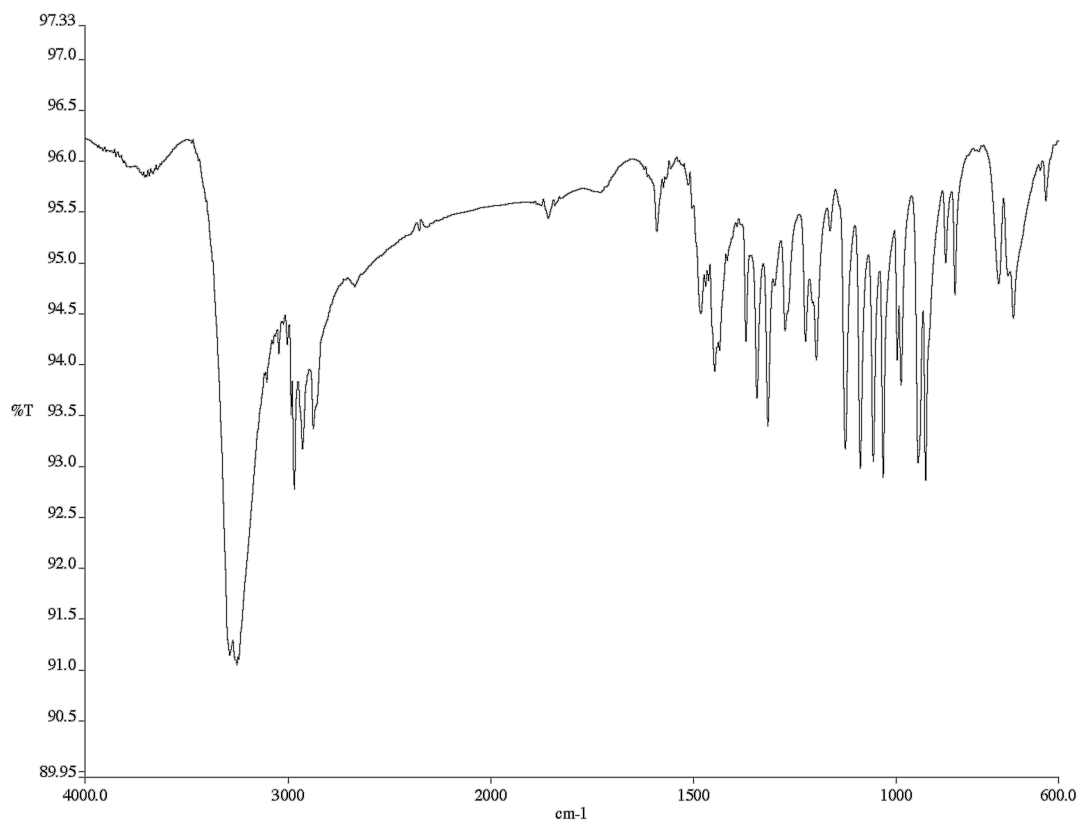

Infrared spectrum (Thin Film, NaCl) of compound **ent-18**.

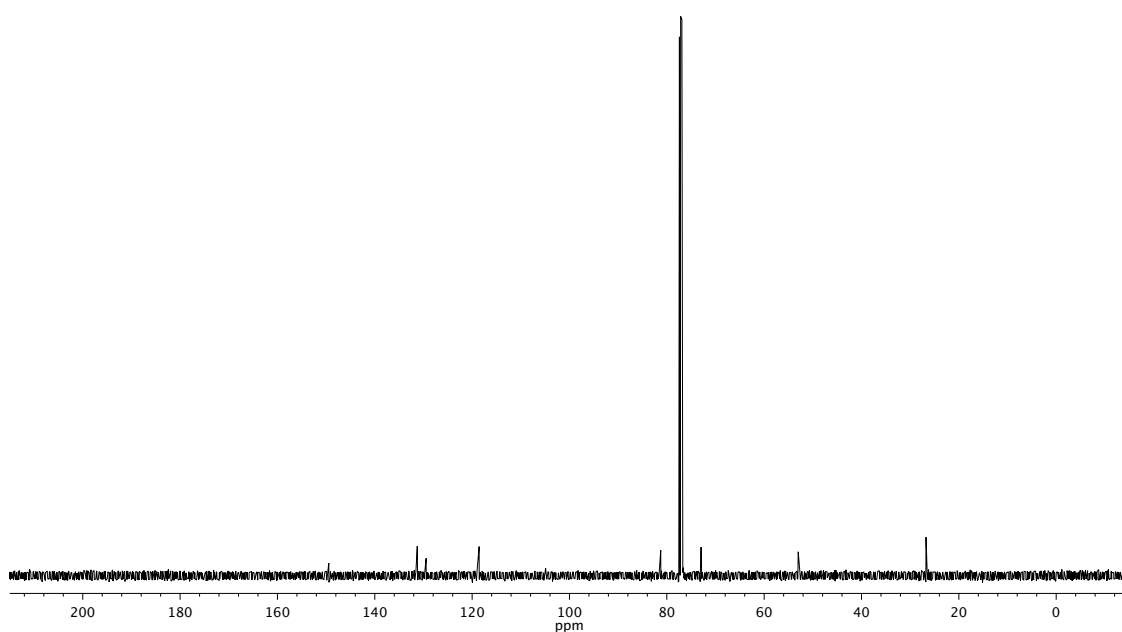

<sup>13</sup>C NMR (76 MHz, CDCl<sub>3</sub>) of compound **ent-18**.

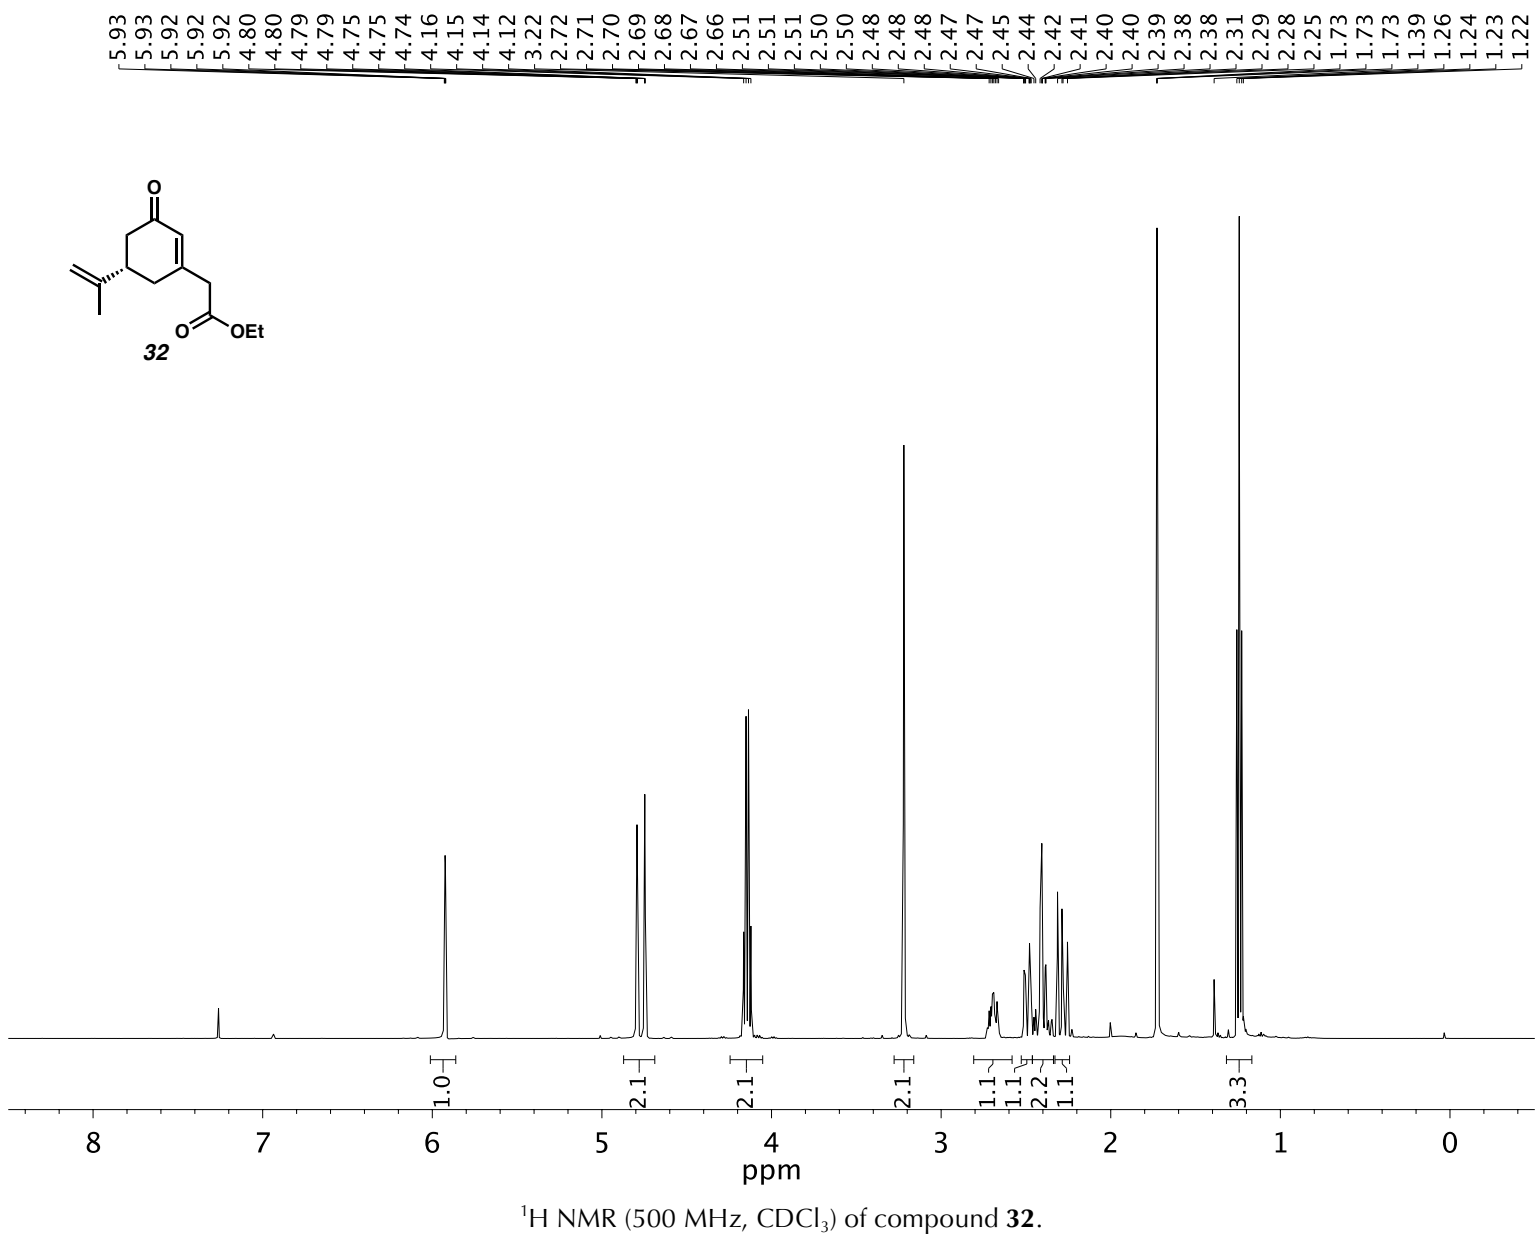

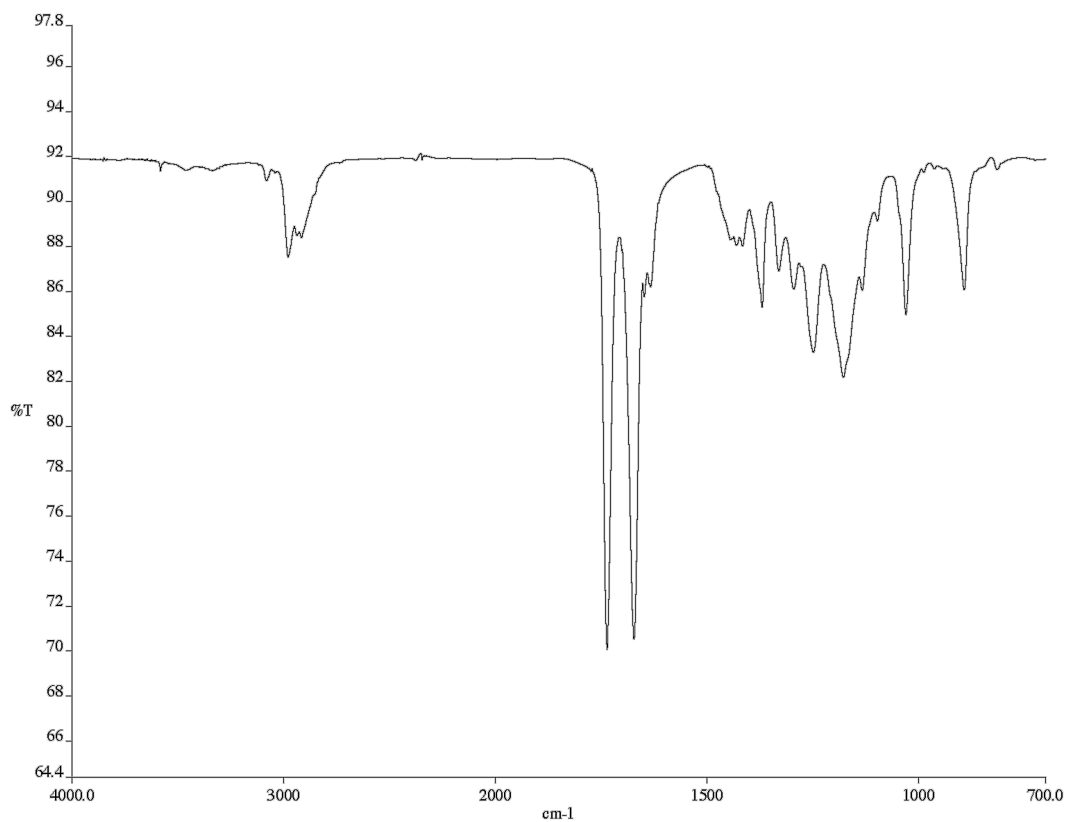

Infrared spectrum (Thin Film, NaCl) of compound **32**.

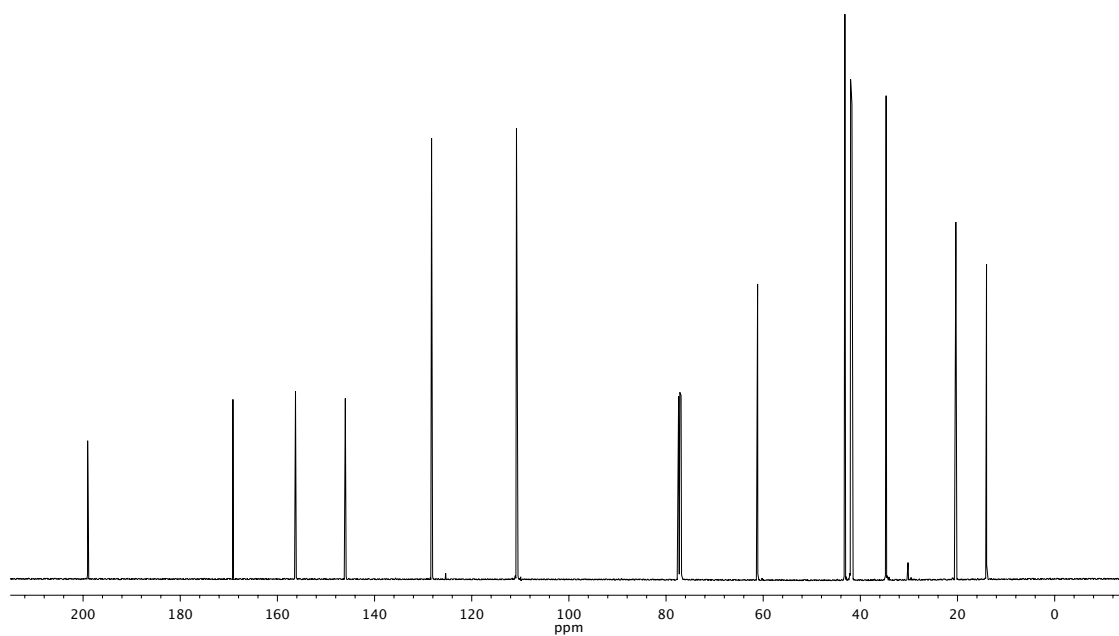

<sup>13</sup>C NMR (126 MHz, CDCl<sub>3</sub>) of compound **32**.



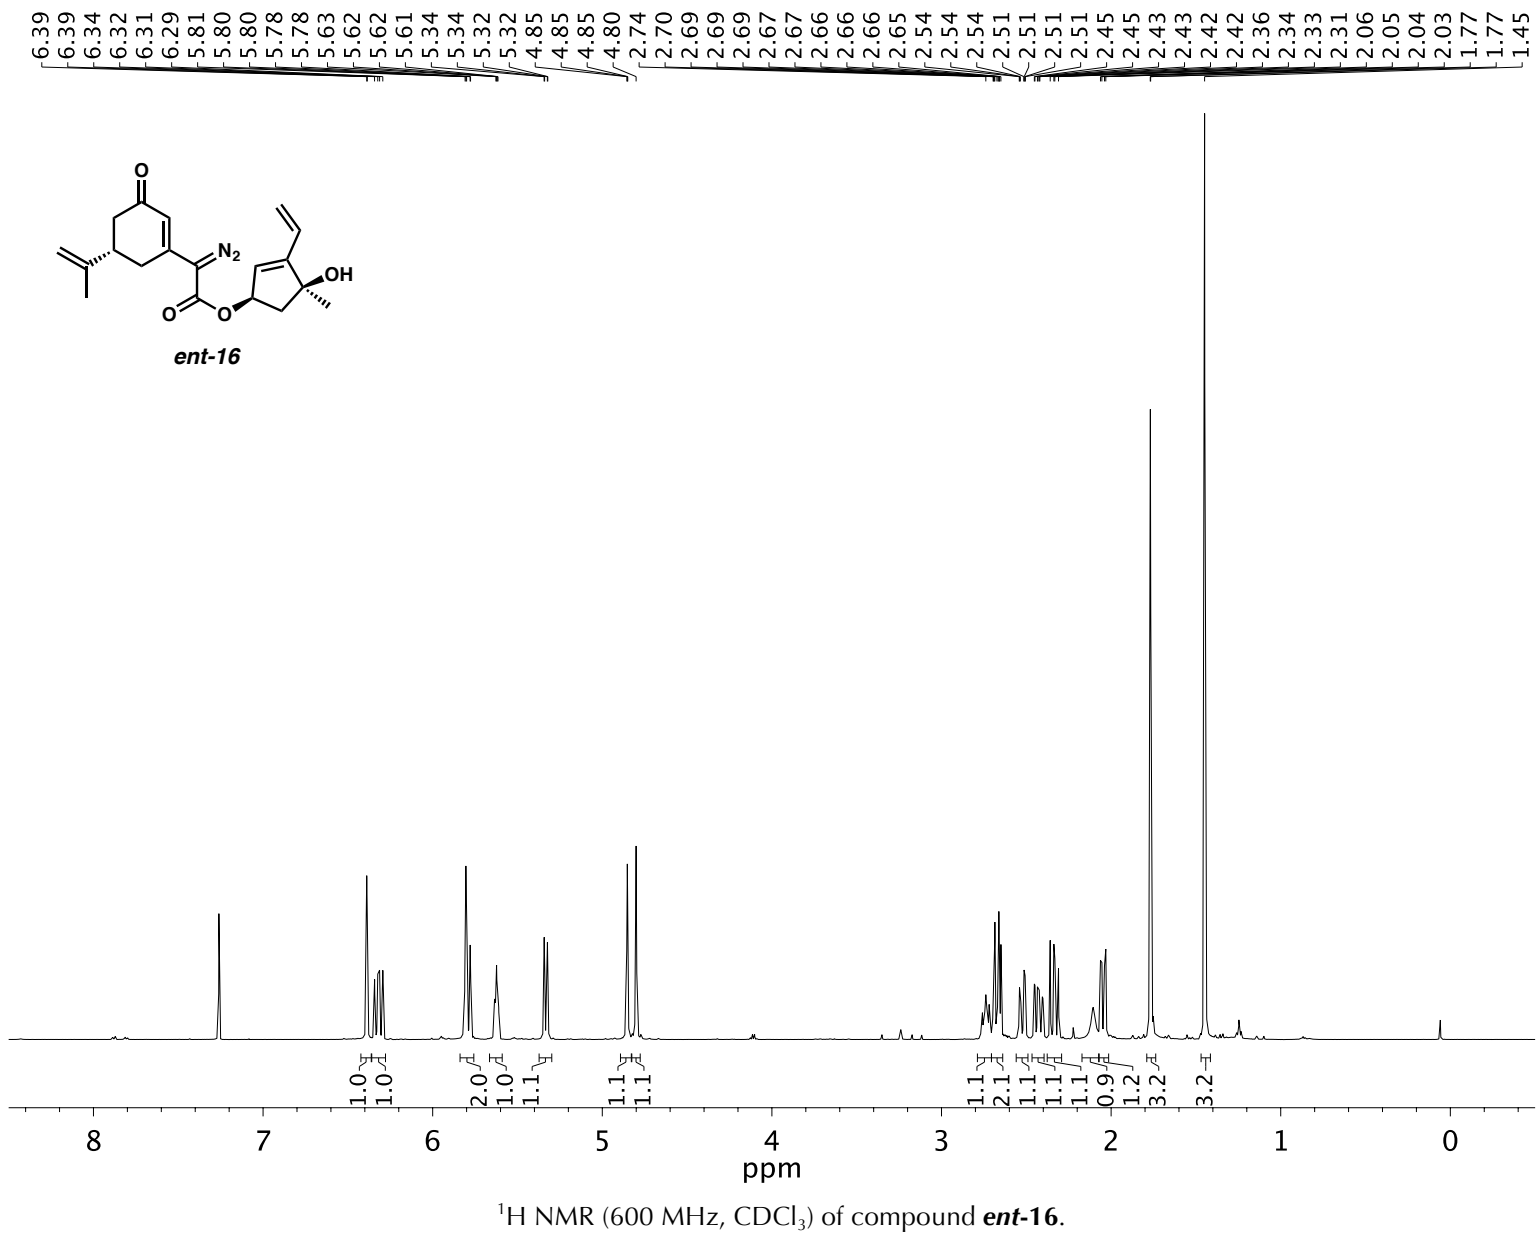

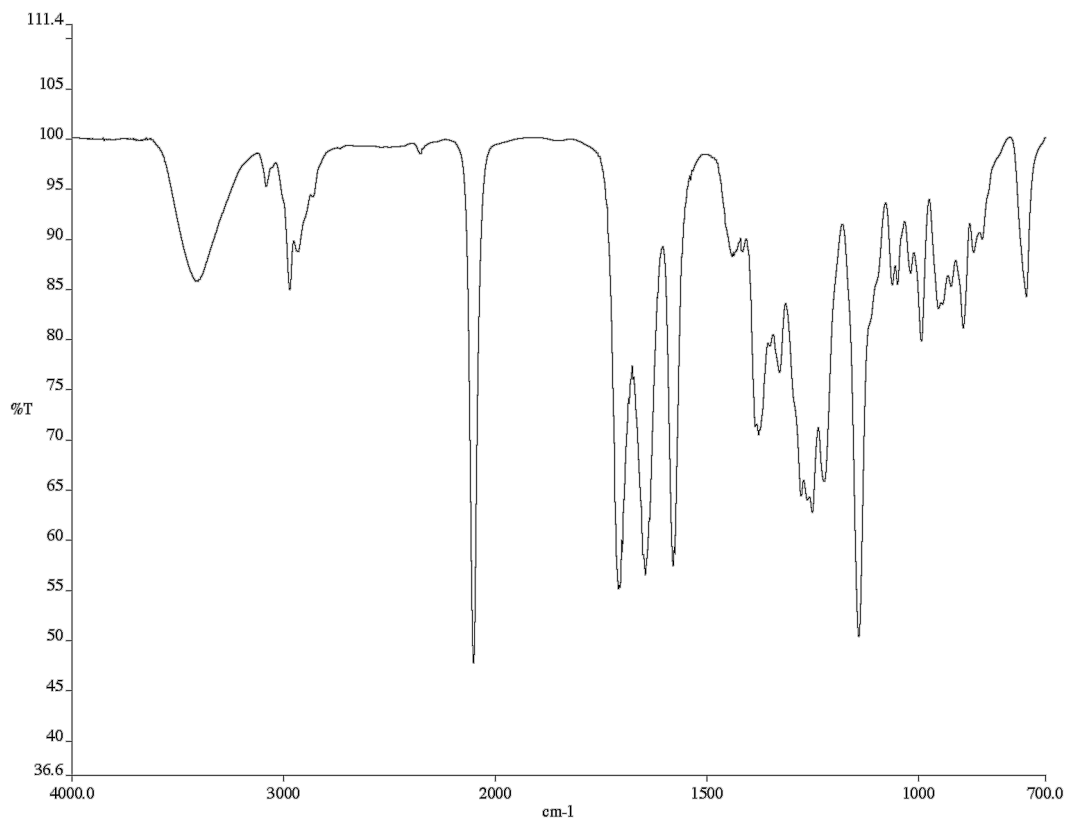Infrared spectrum (Thin Film, NaCl) of compound **ent-16**.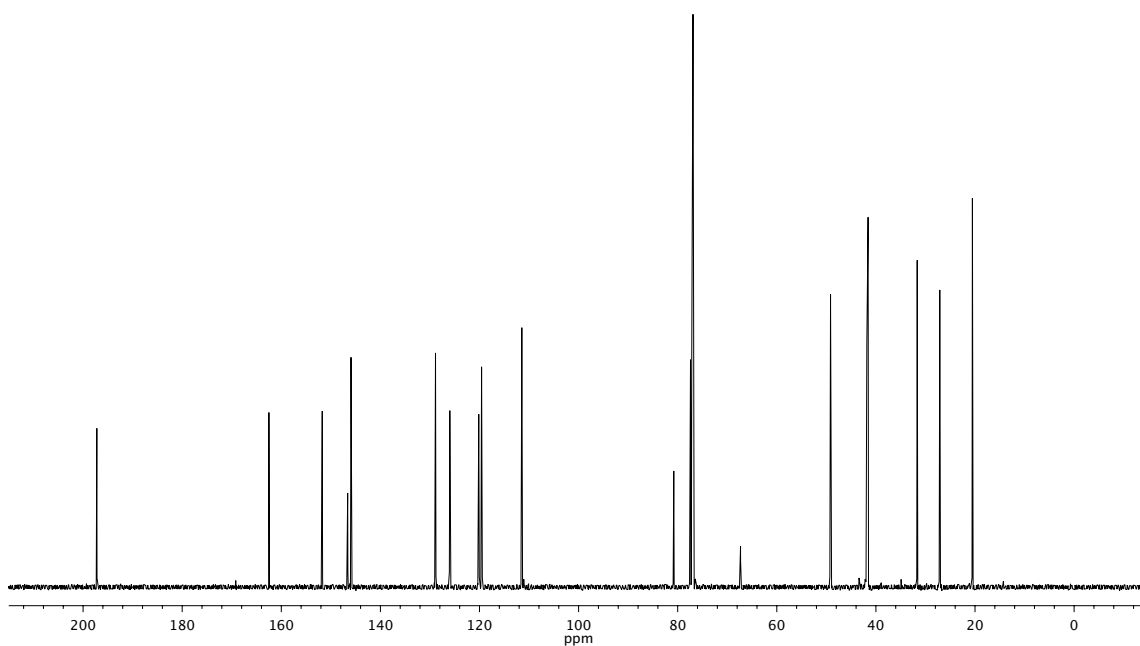<sup>13</sup>C NMR (126 MHz, CDCl<sub>3</sub>) of compound **ent-16**.

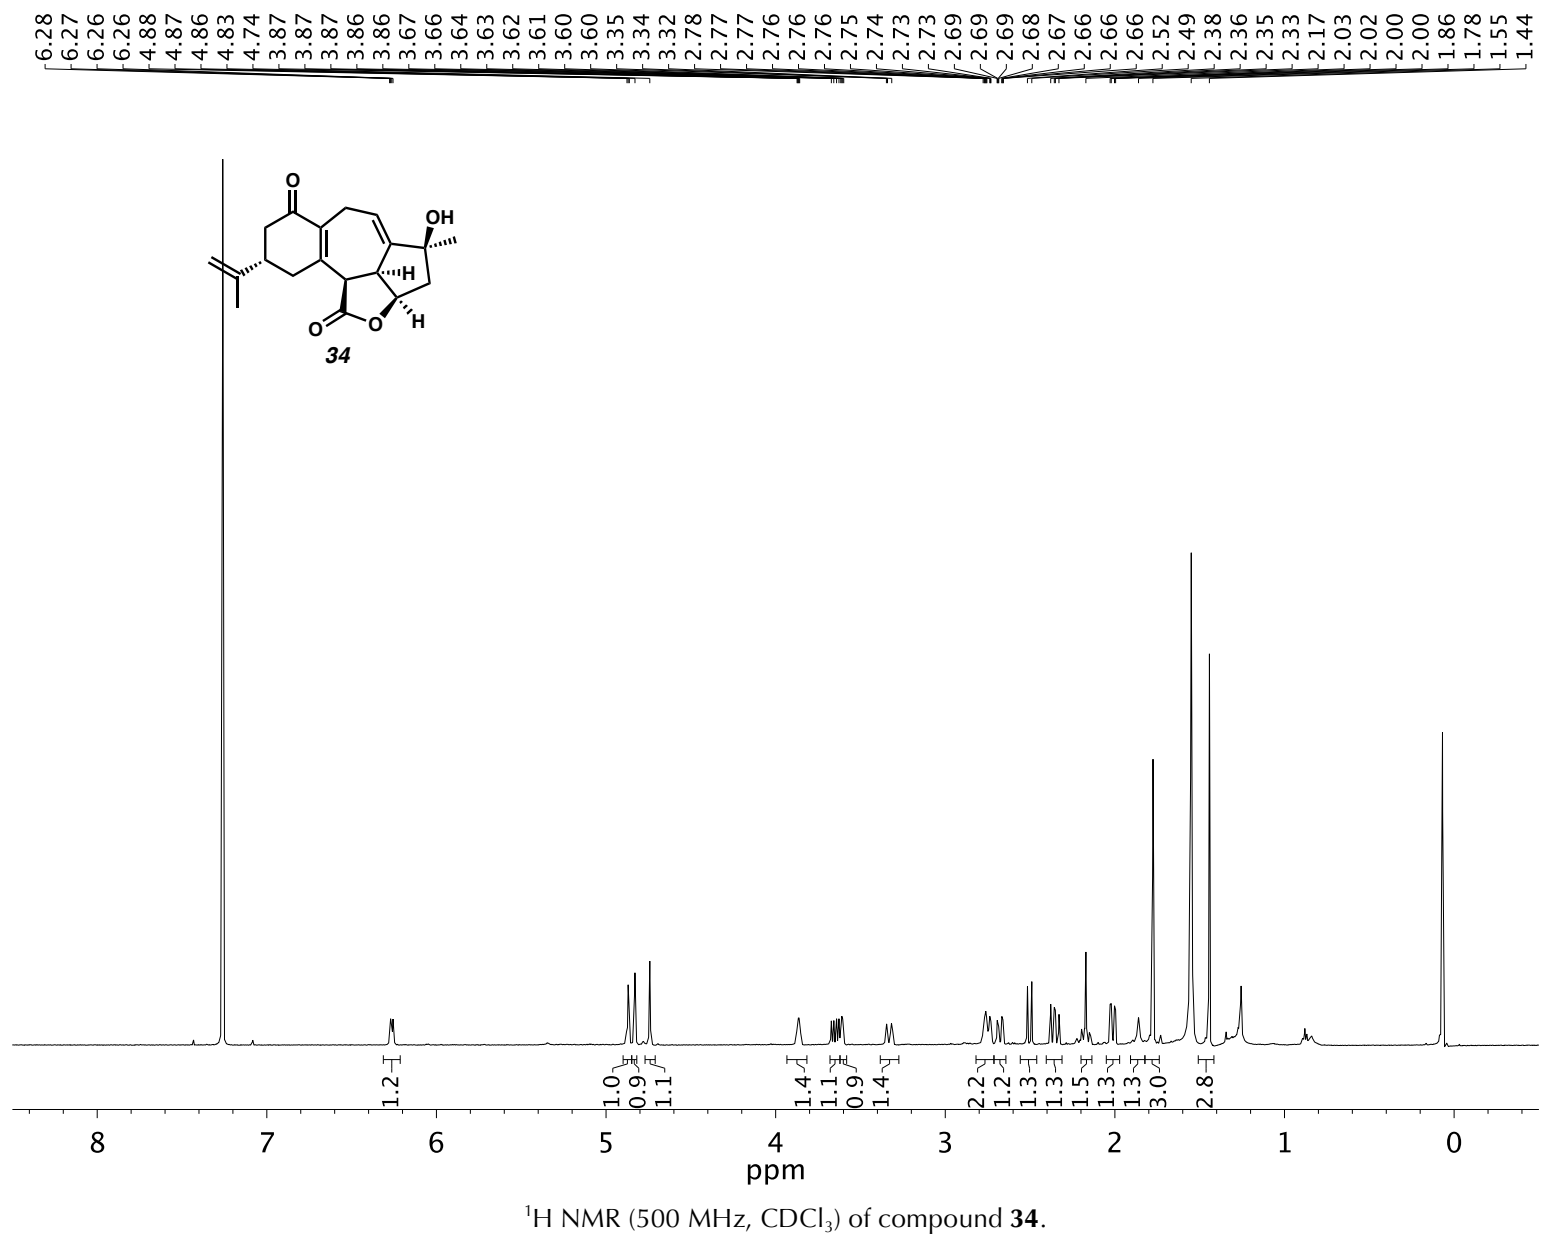

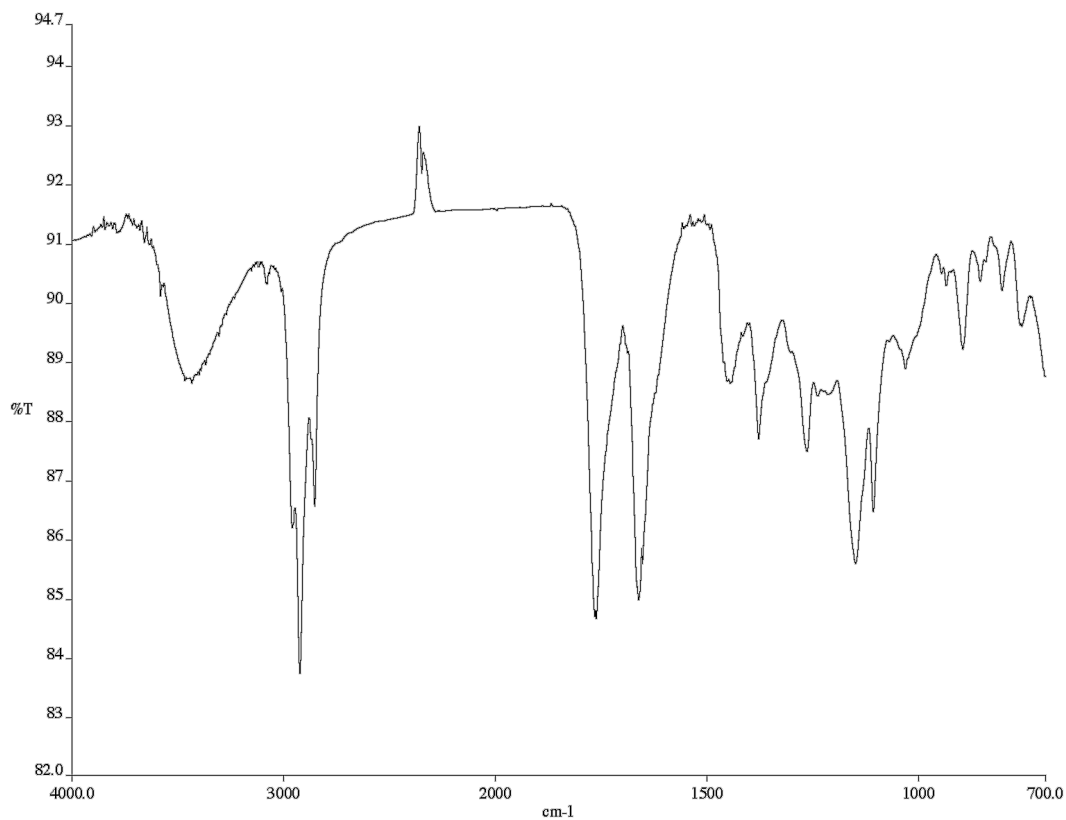

Infrared spectrum (Thin Film, NaCl) of compound **34**.

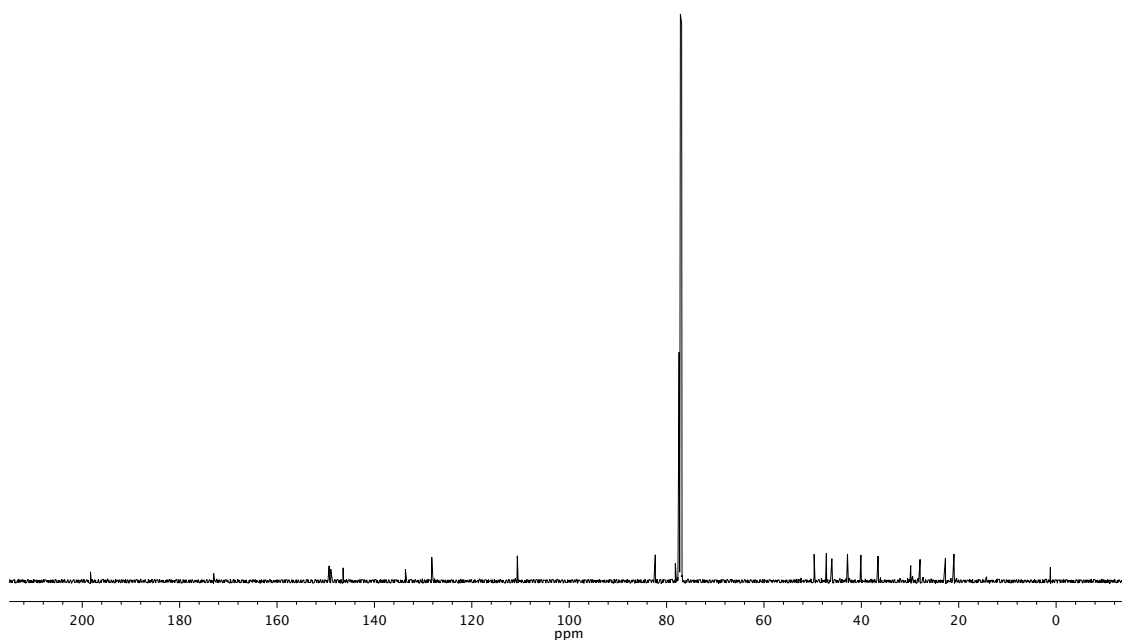

<sup>13</sup>C NMR (126 MHz, CDCl<sub>3</sub>) of compound **34**.

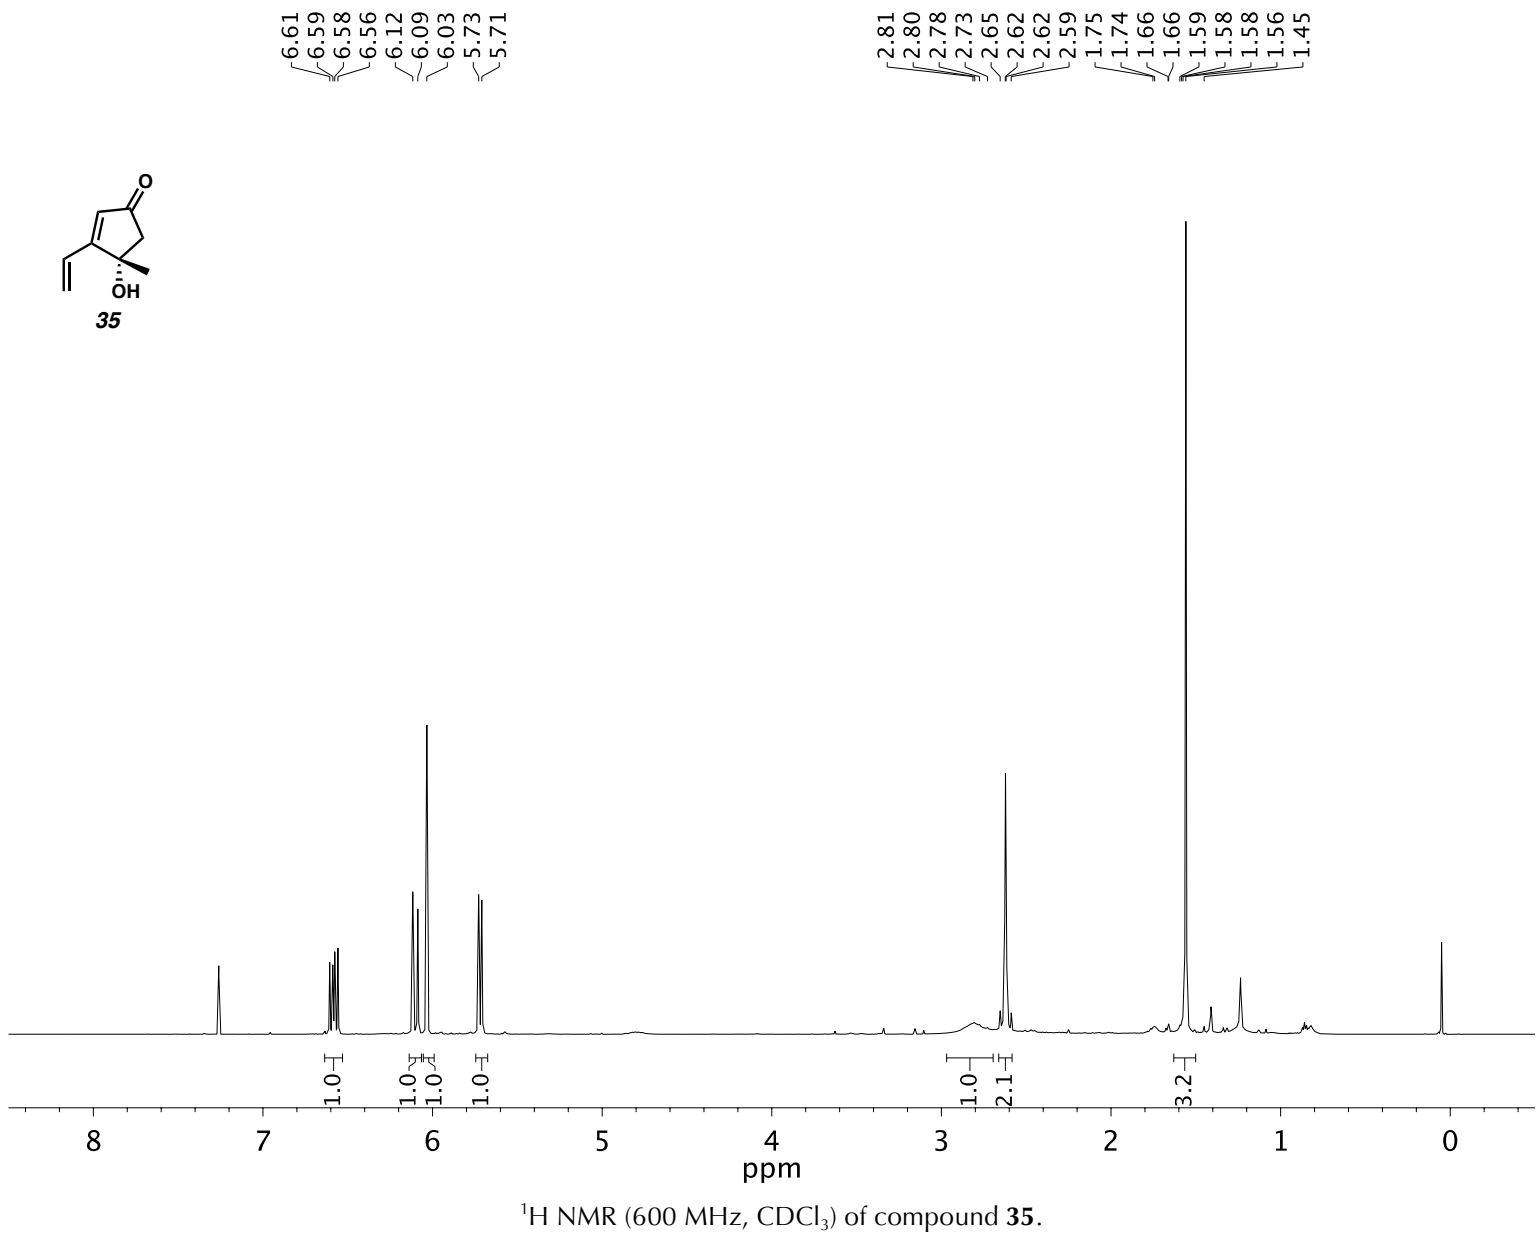

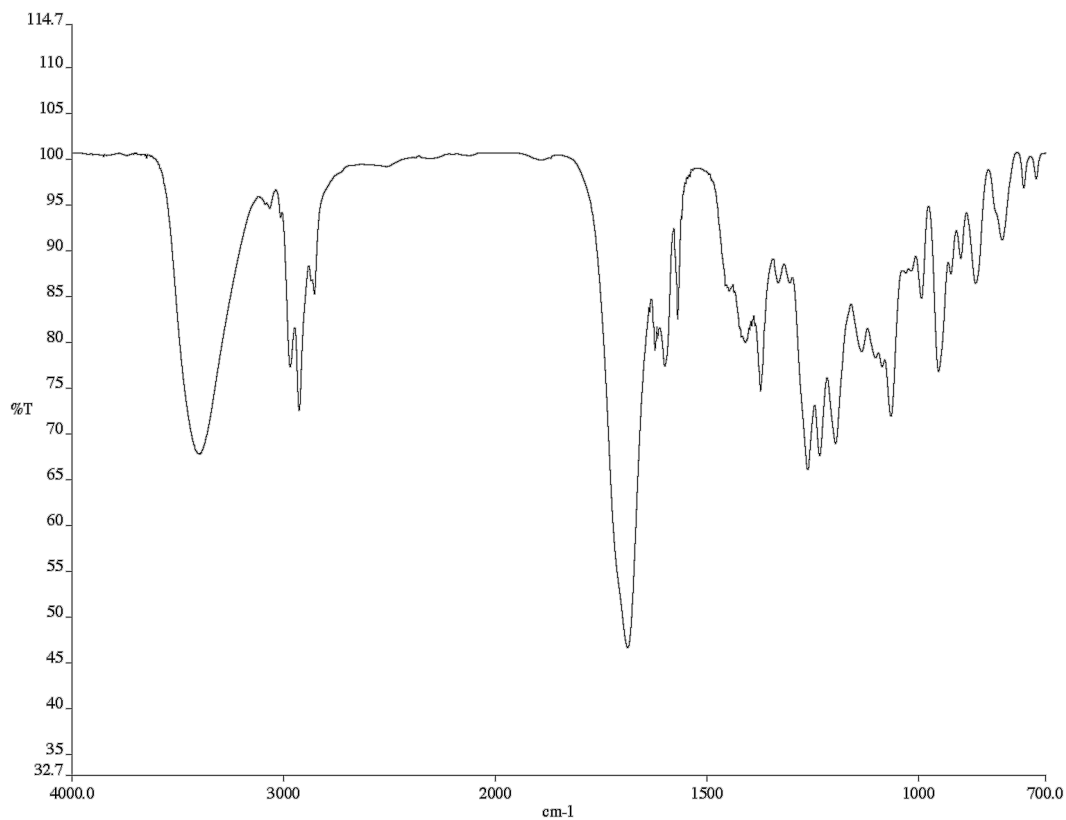

Infrared spectrum (Thin Film, NaCl) of compound **35**.

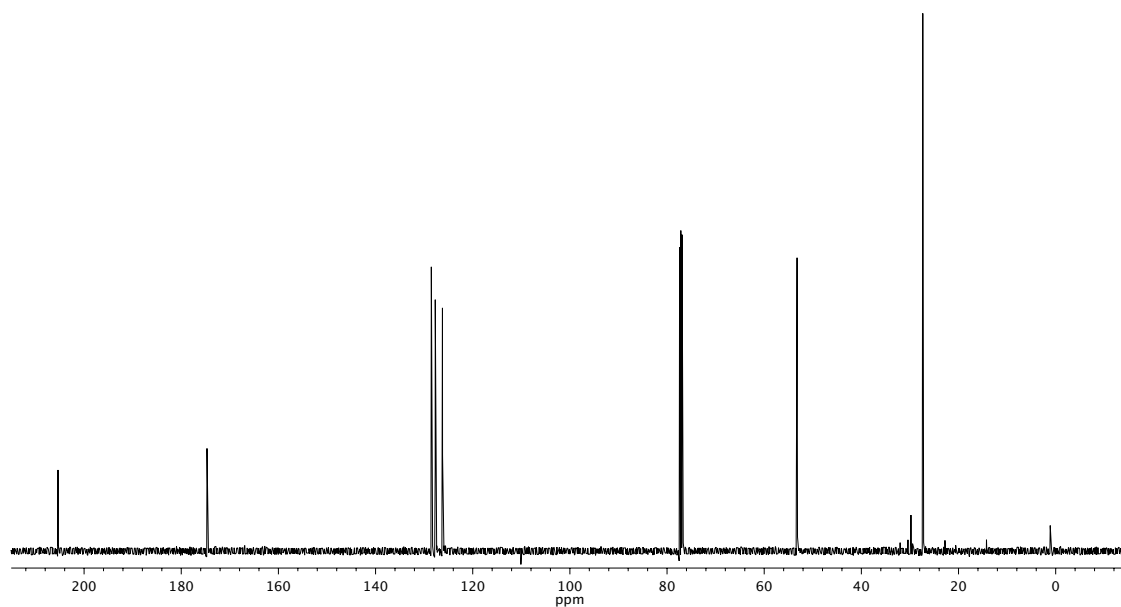

<sup>13</sup>C NMR (126 MHz, CDCl<sub>3</sub>) of compound **35**.

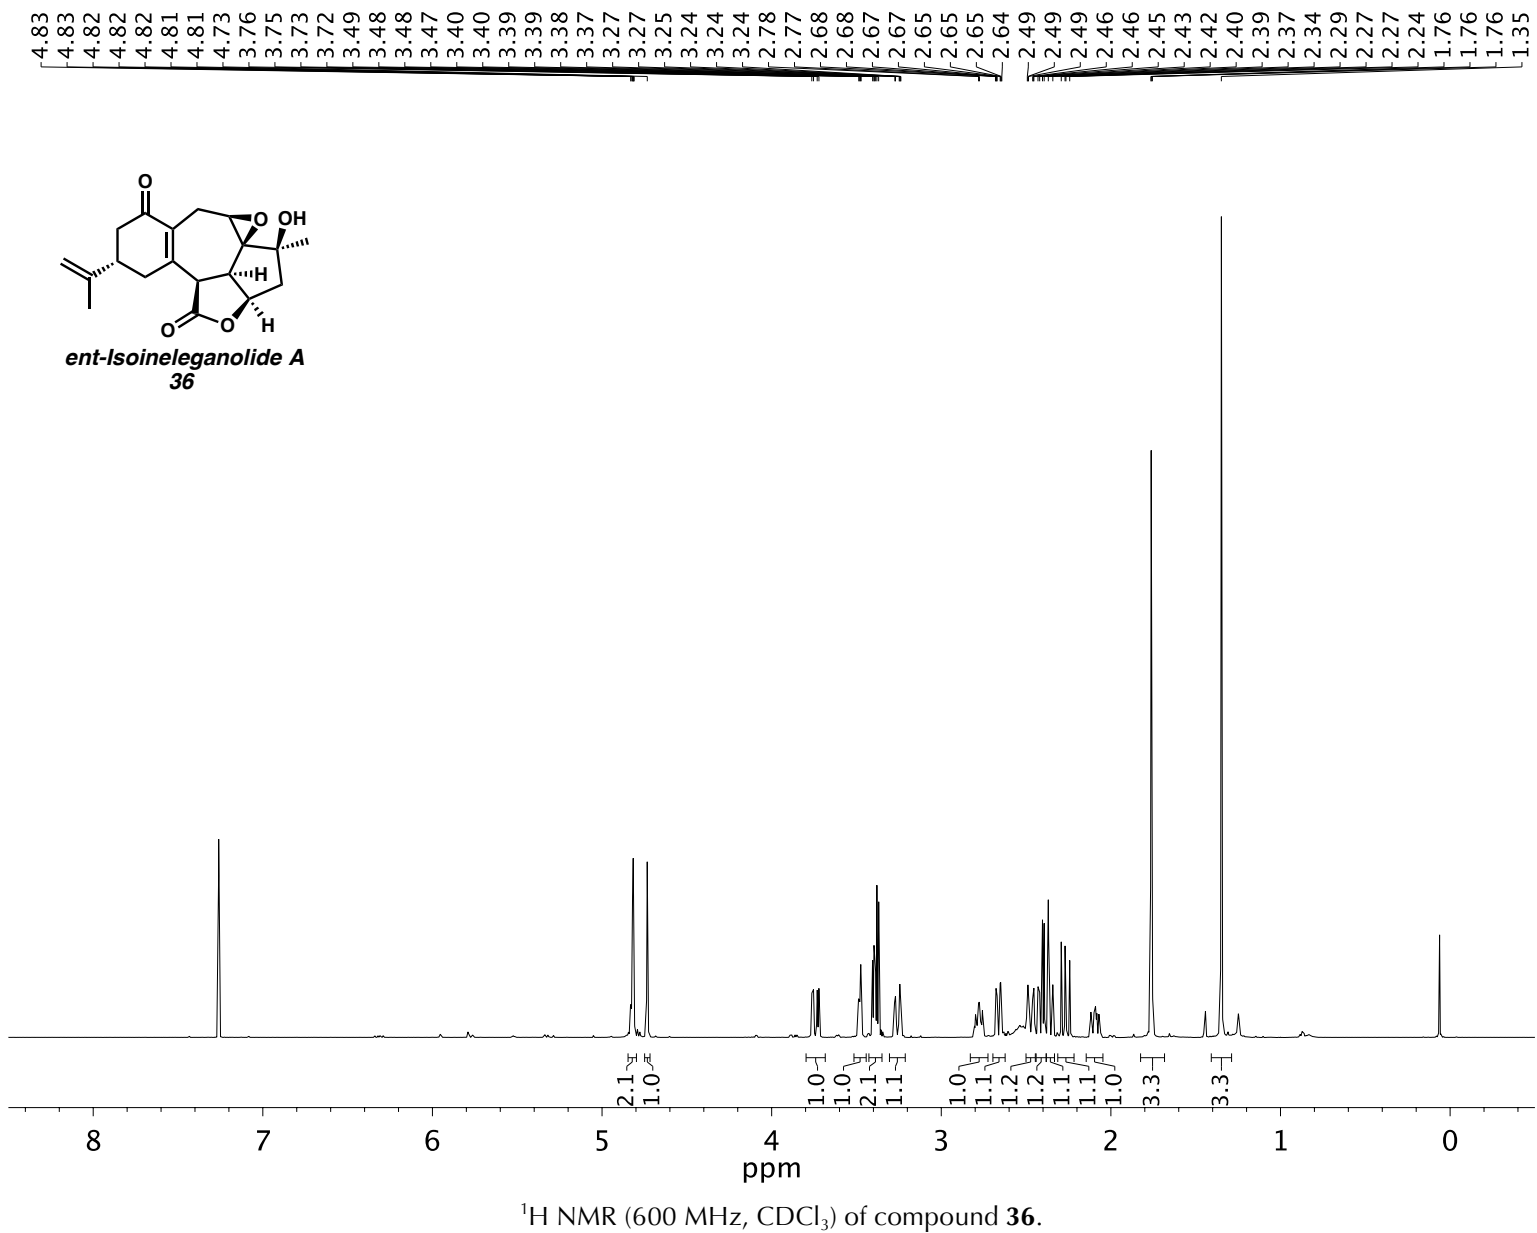

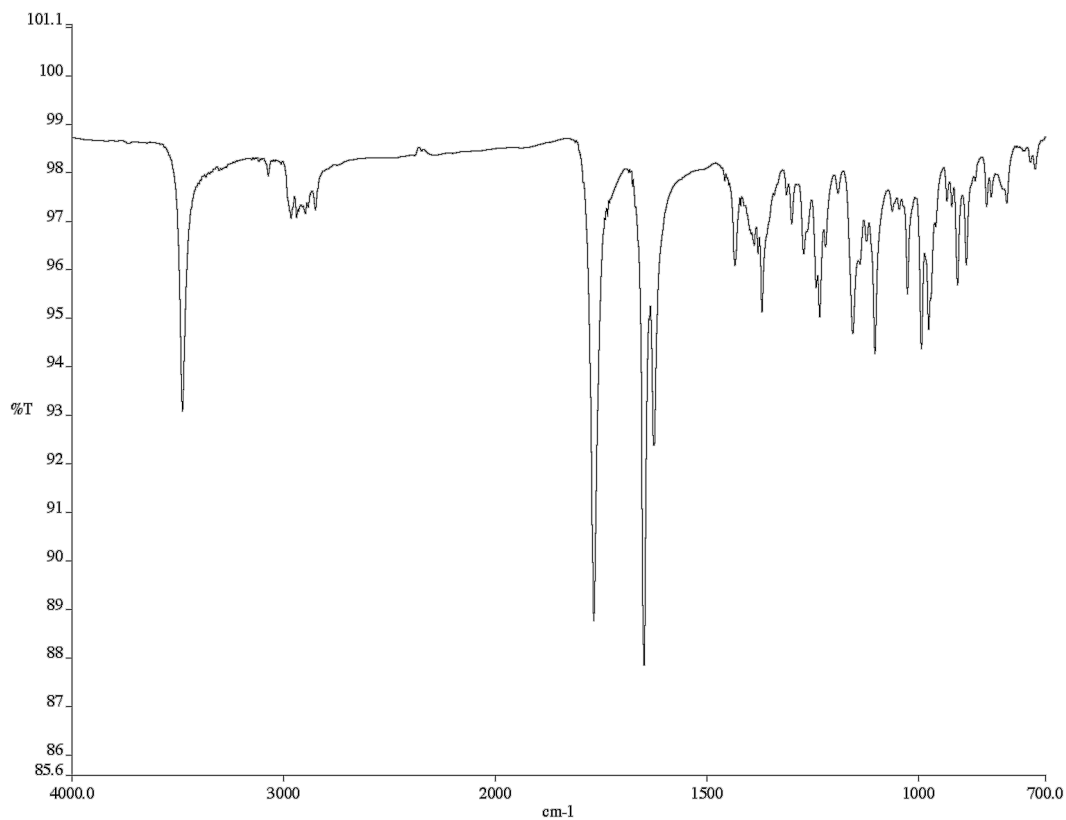

Infrared spectrum (Thin Film, NaCl) of compound **36**.

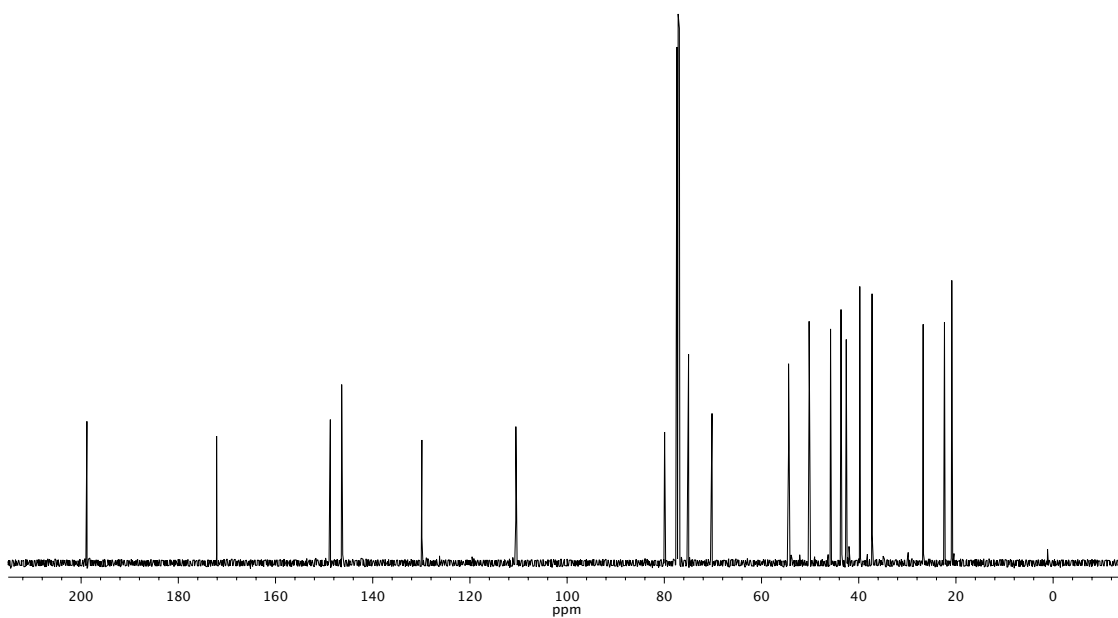

<sup>13</sup>C NMR (126 MHz, CDCl<sub>3</sub>) of compound **36**.



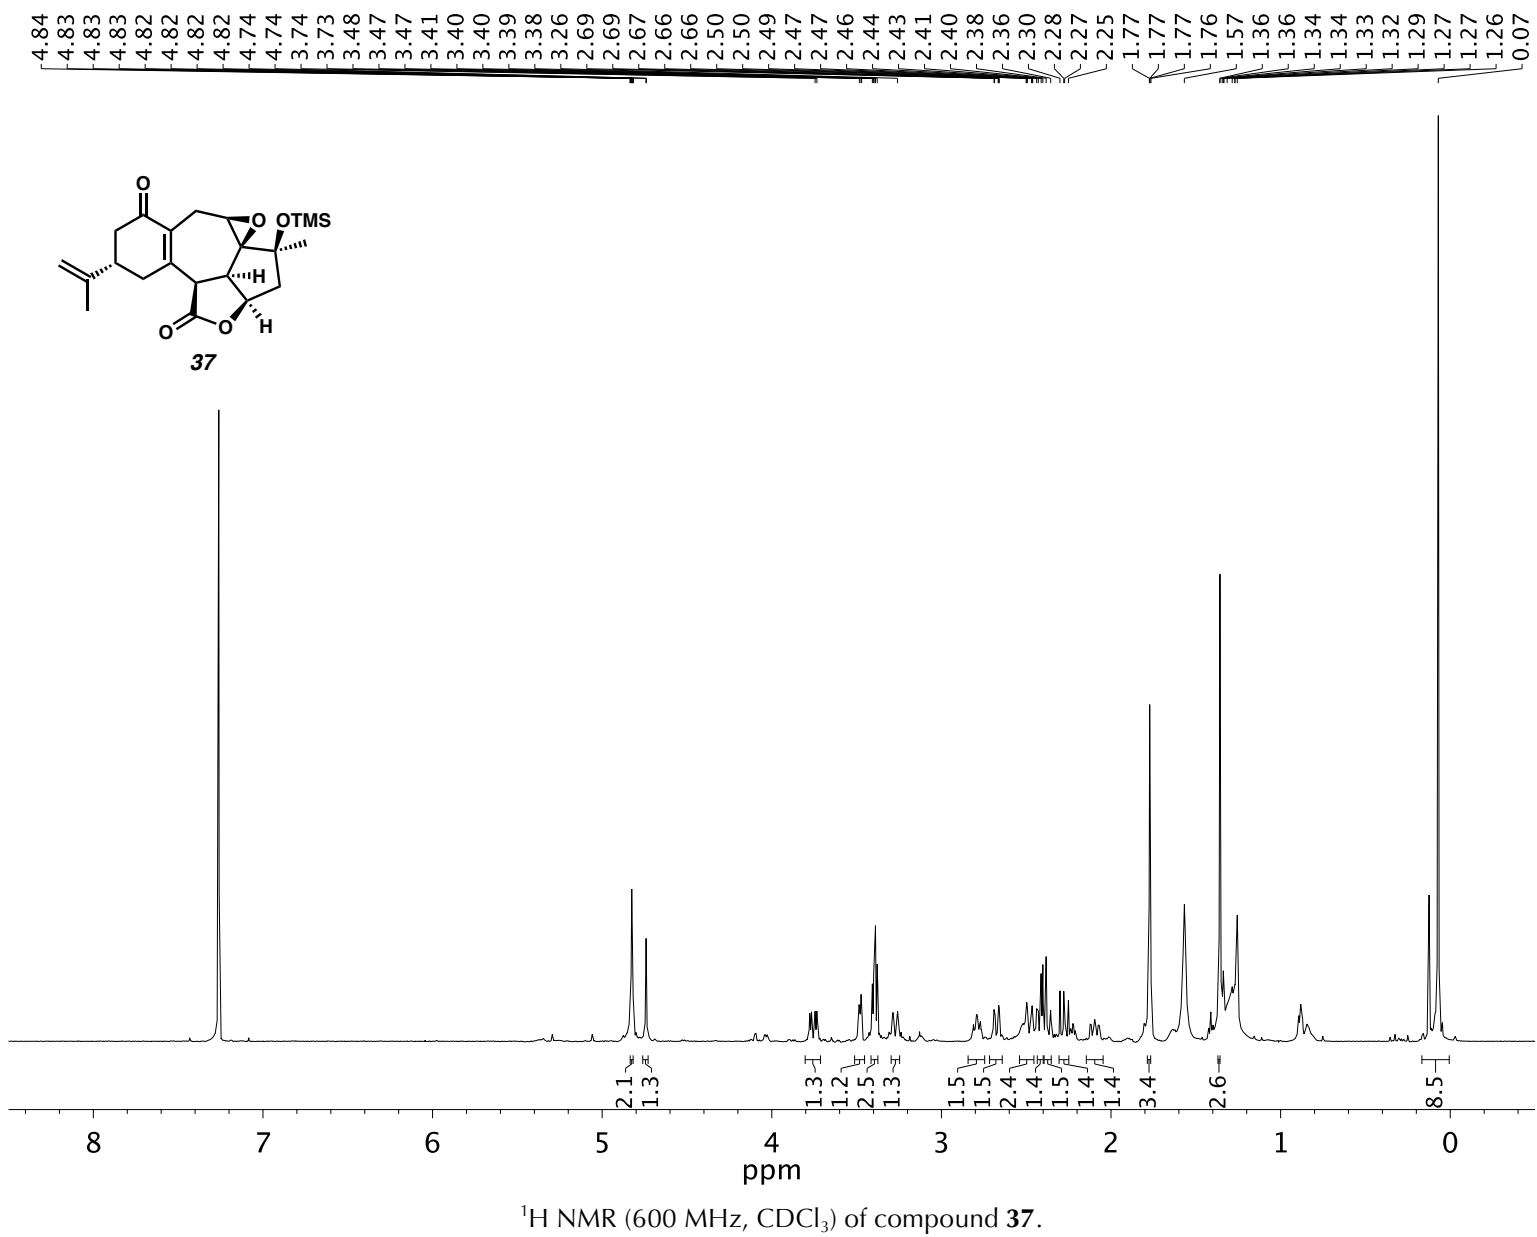

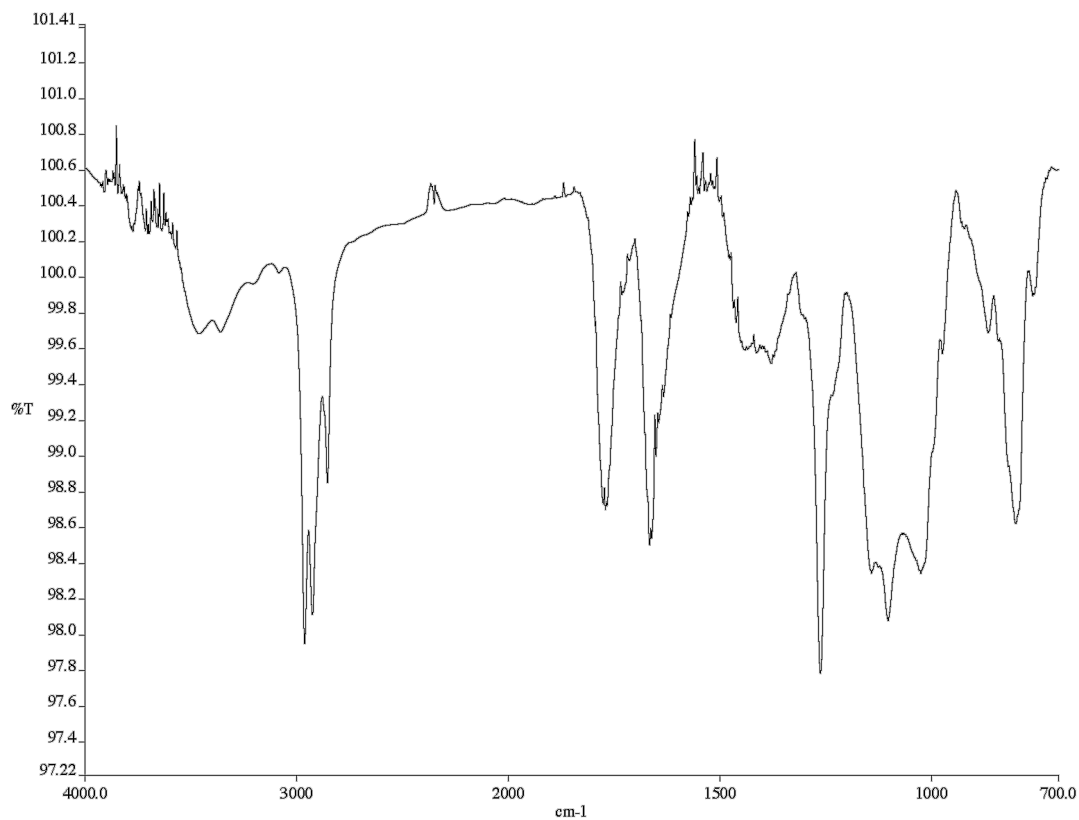

Infrared spectrum (Thin Film, NaCl) of compound **37**.

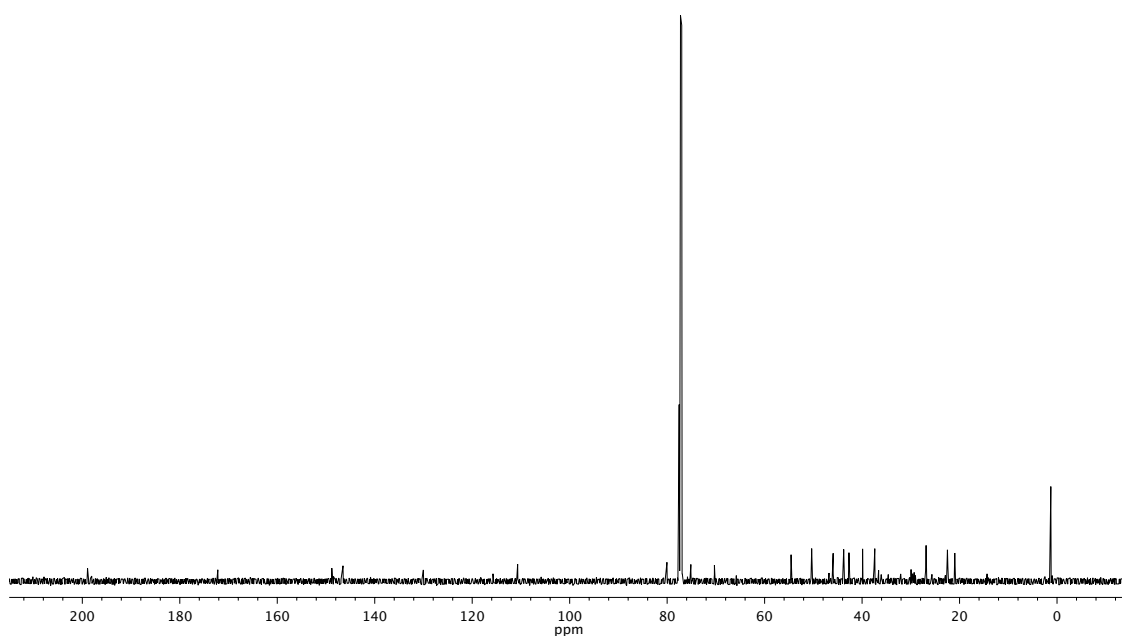

<sup>13</sup>C NMR (126 MHz, CDCl<sub>3</sub>) of compound **37**.

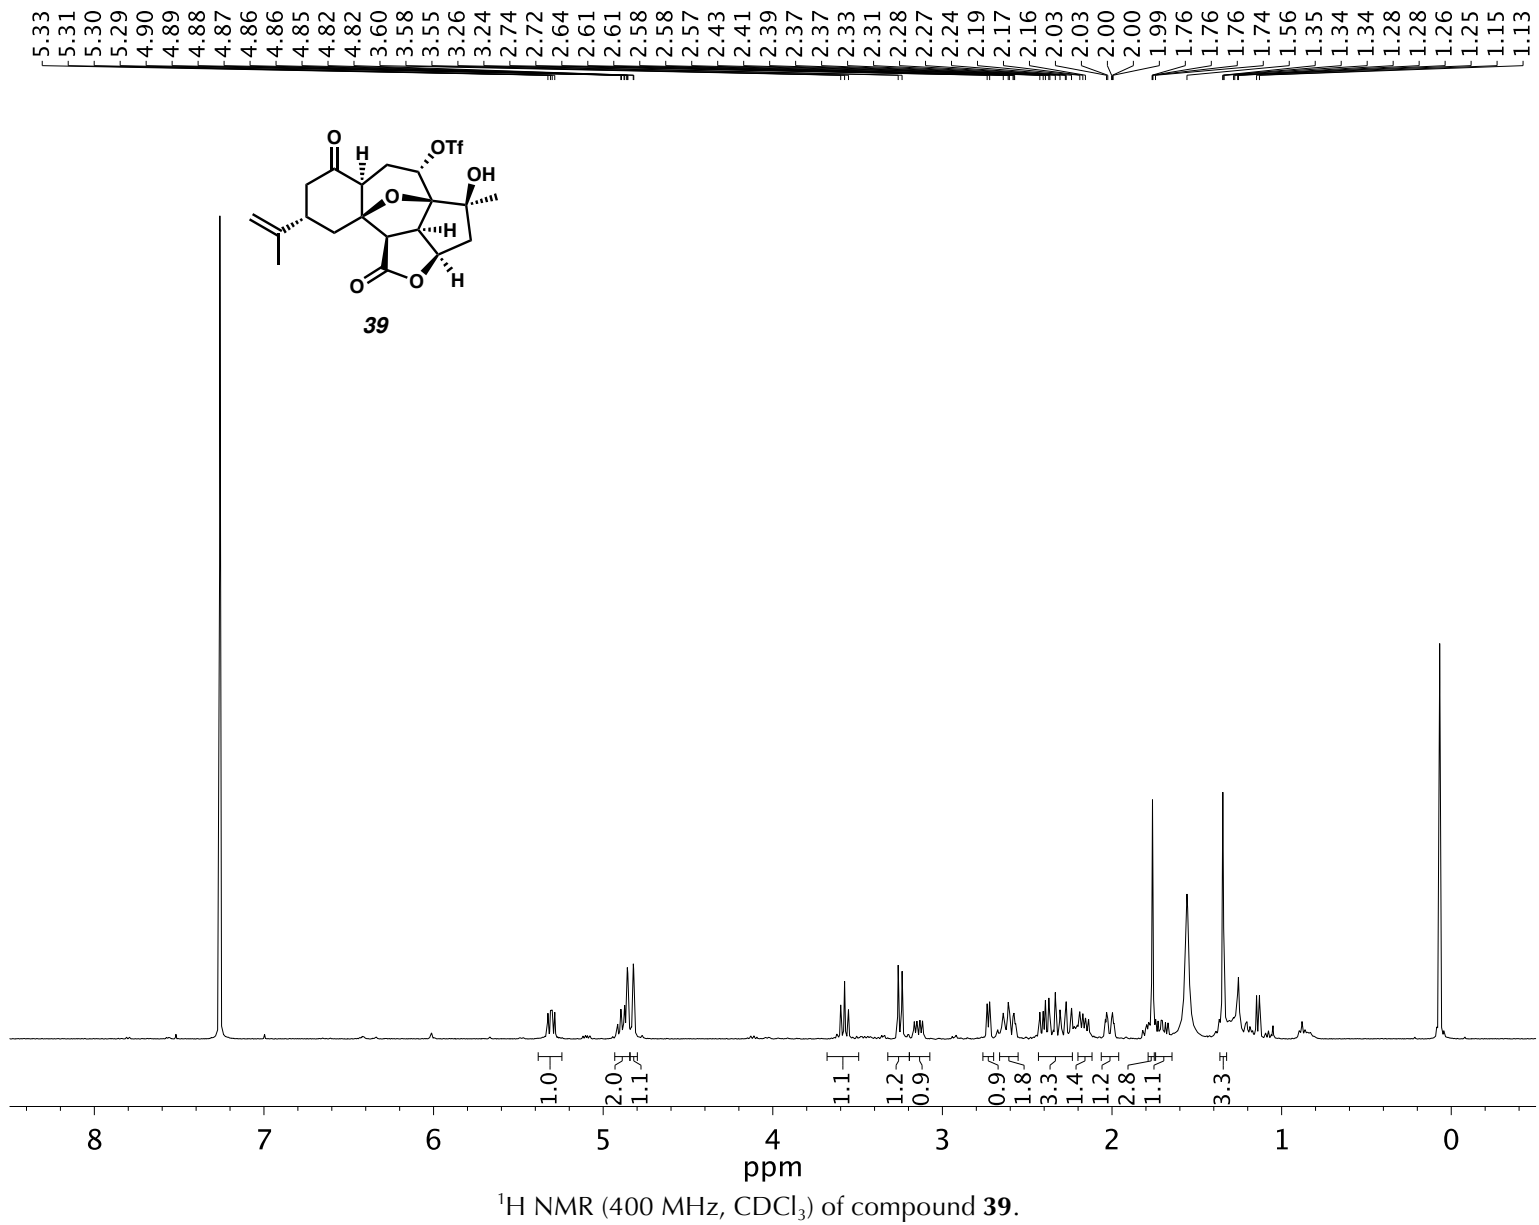

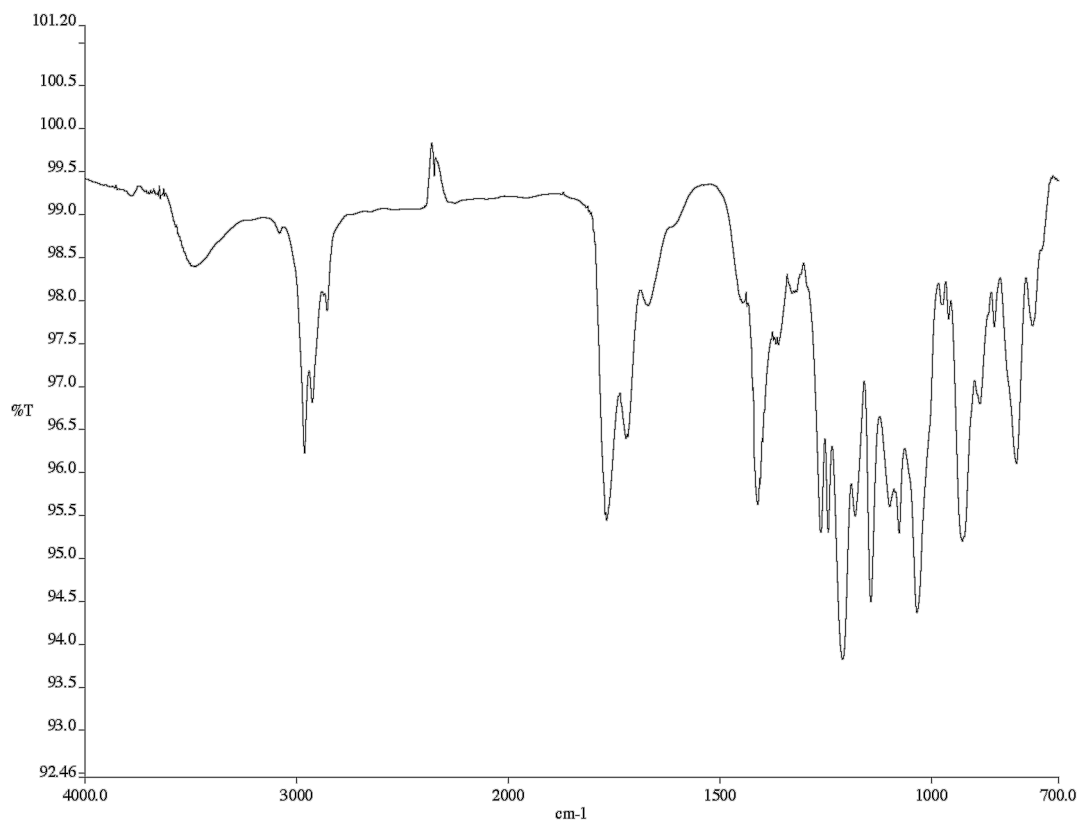

Infrared spectrum (Thin Film, NaCl) of compound **39**.

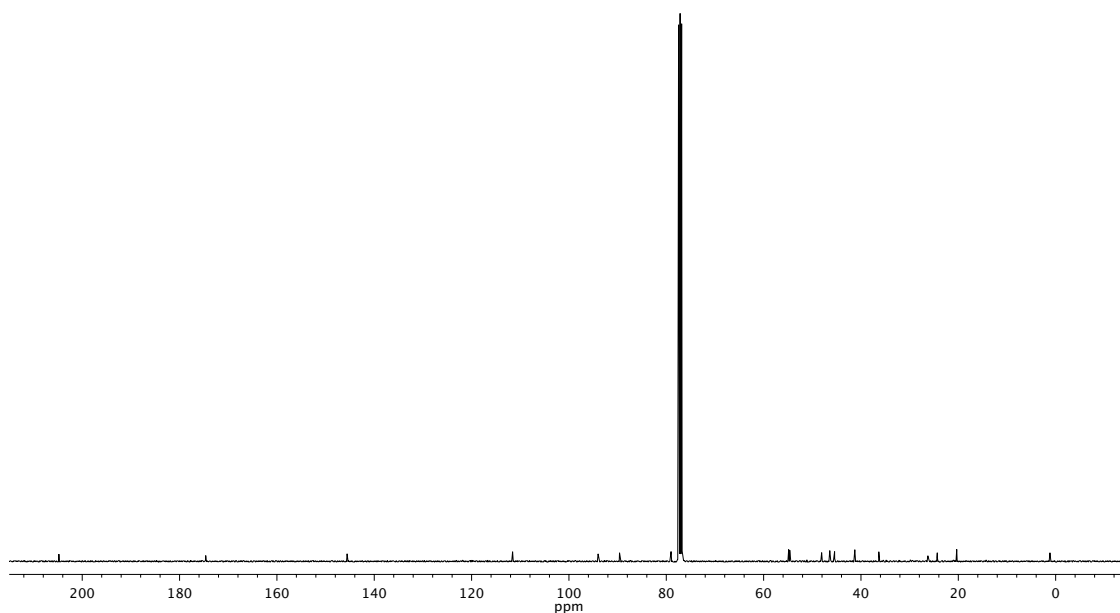

<sup>13</sup>C NMR (101 MHz, CDCl<sub>3</sub>) of compound **39**.

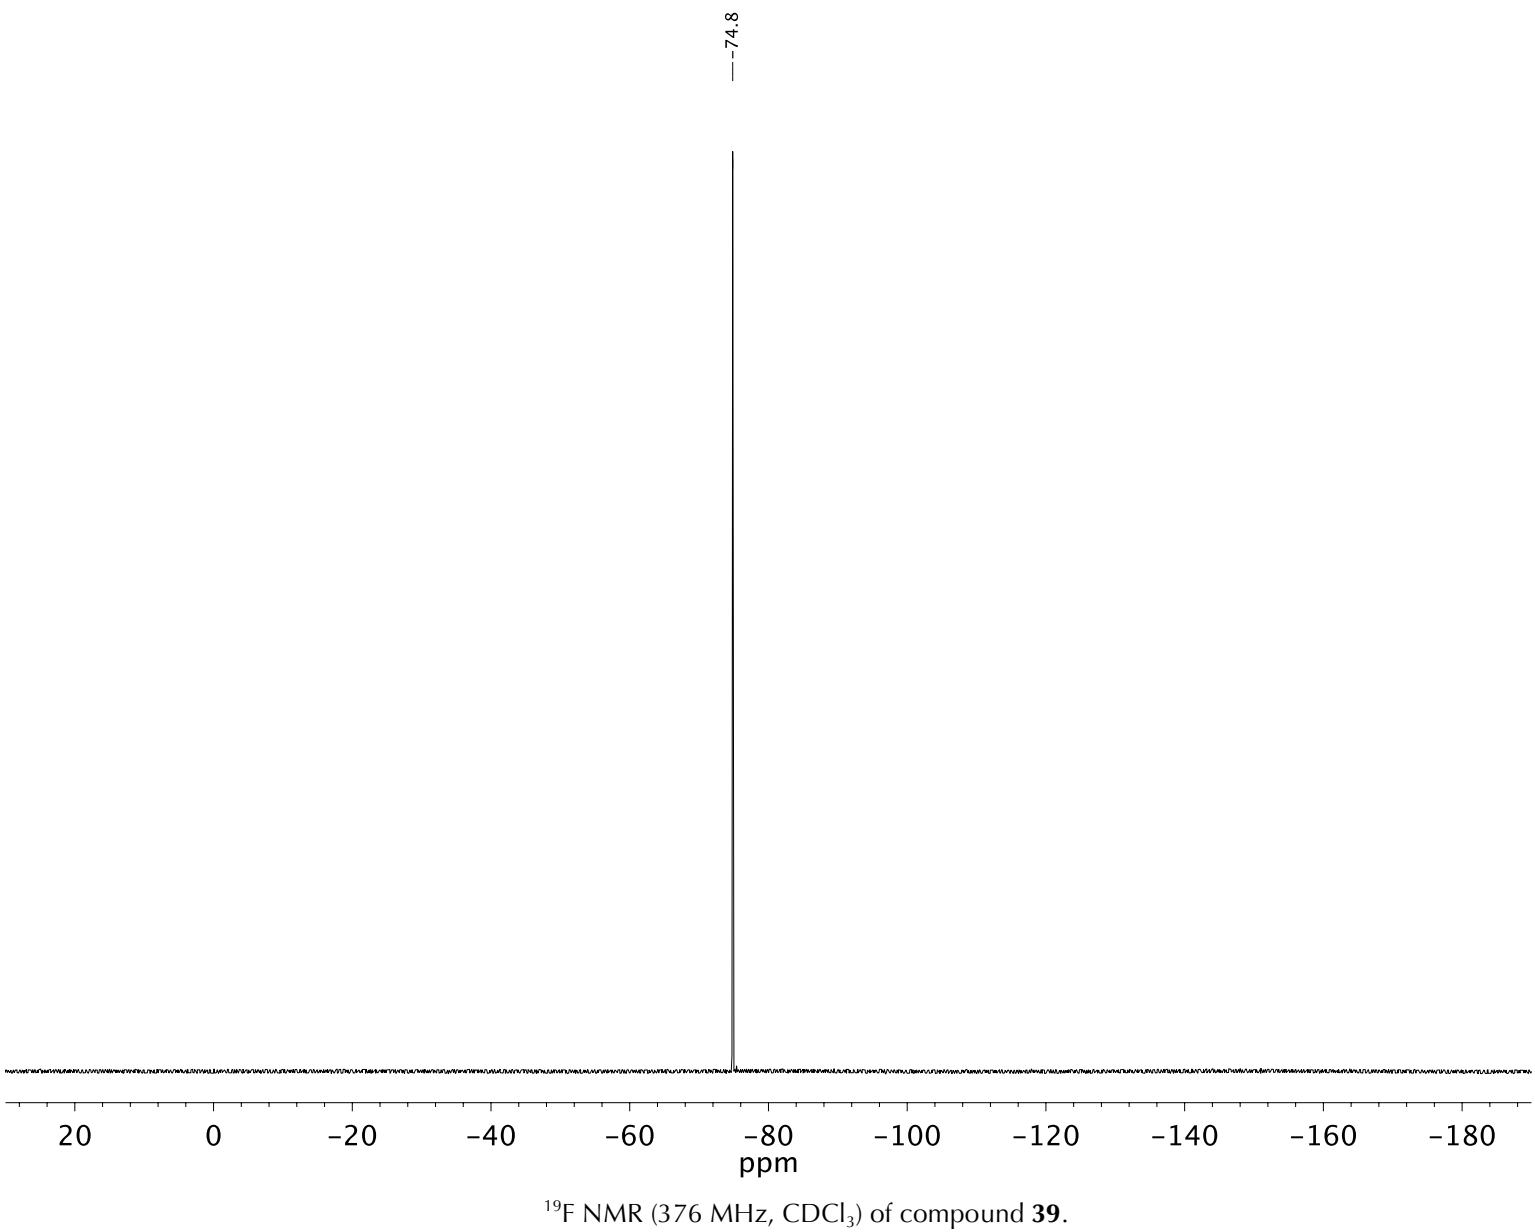

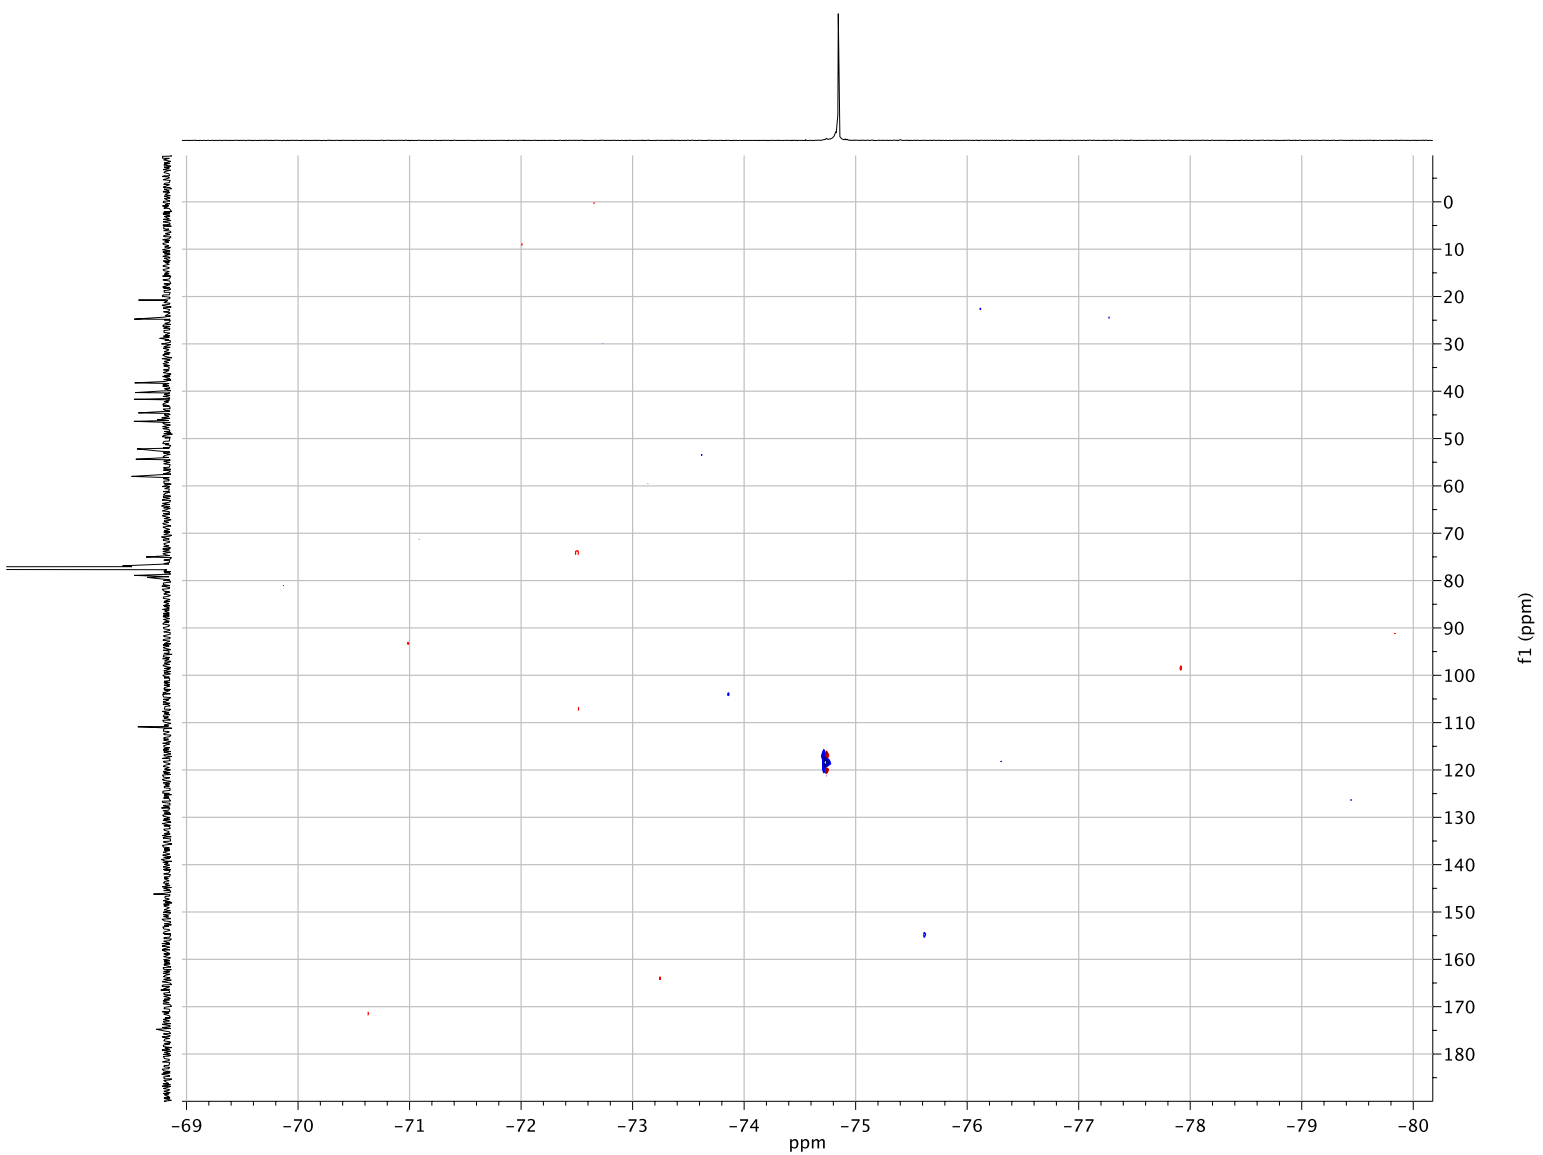

$^{19}\text{F}$  -  $^{13}\text{C}$  HSQC NMR (376 and 101 MHz, respectively,  $\text{CDCl}_3$ ) of compound **39**.

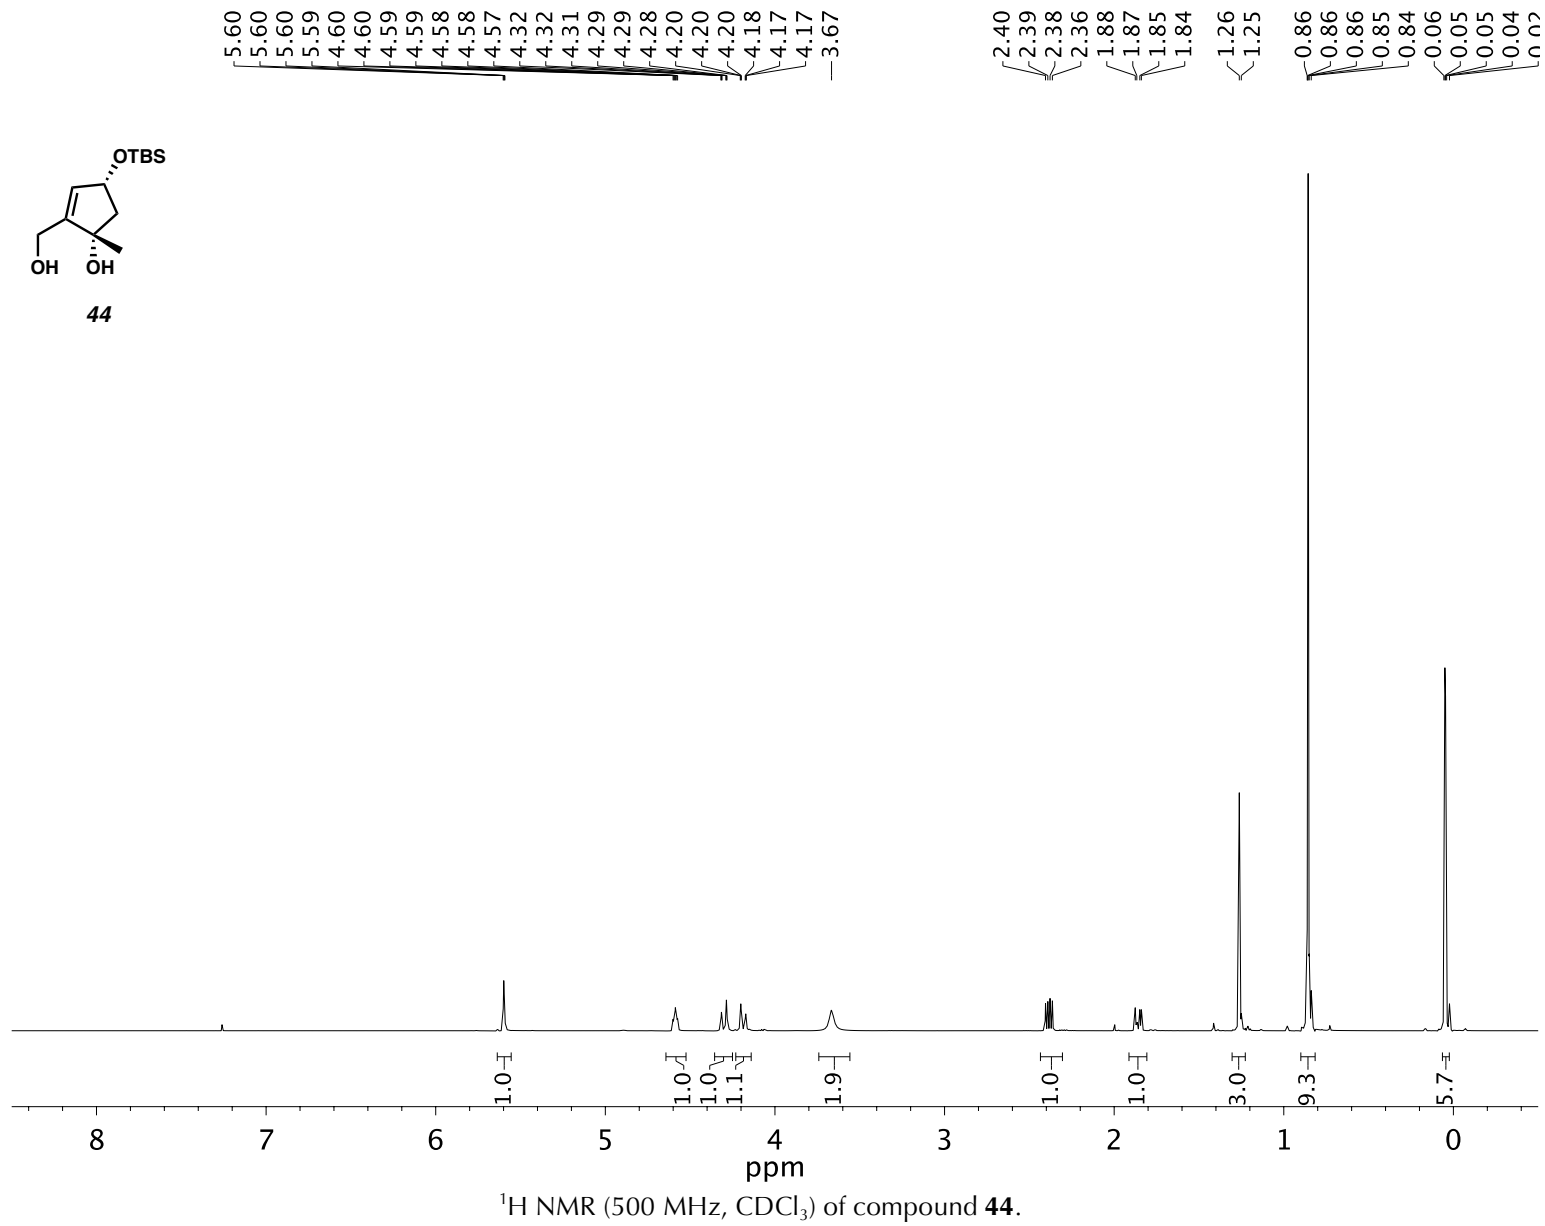

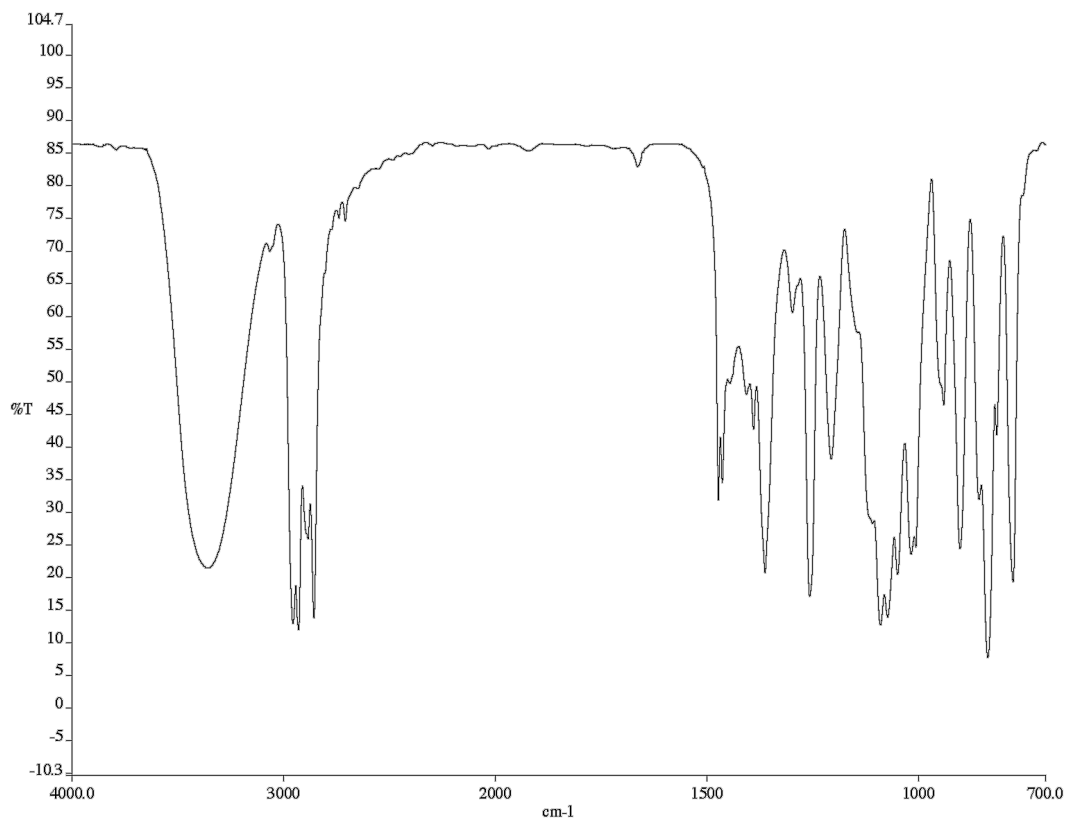

Infrared spectrum (Thin Film, NaCl) of compound **44**.

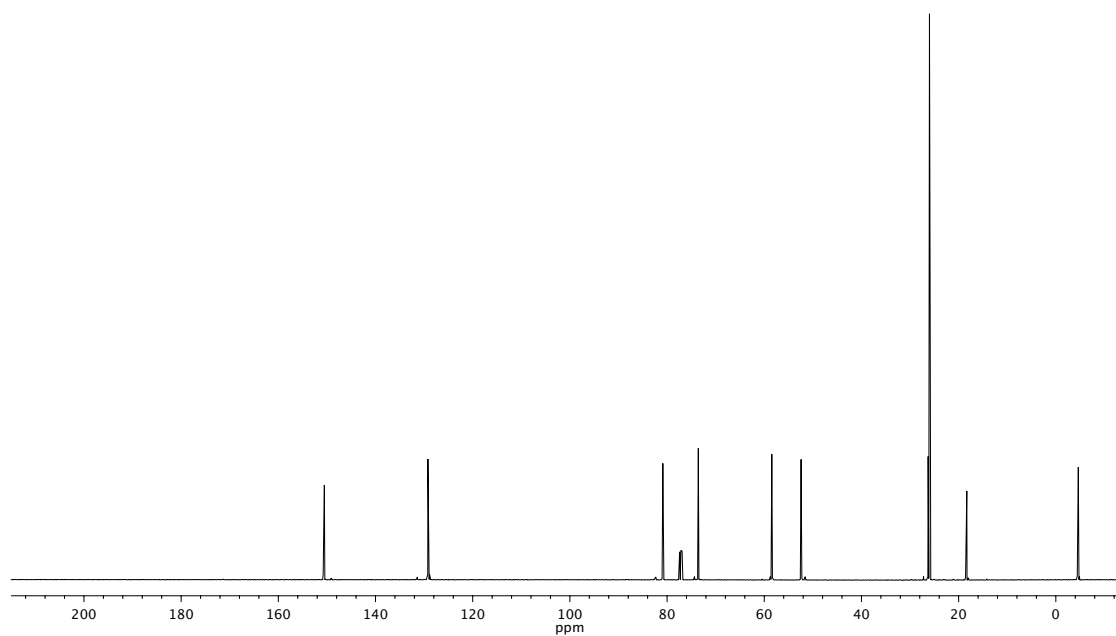

<sup>13</sup>C NMR (126 MHz, CDCl<sub>3</sub>) of compound **44**.



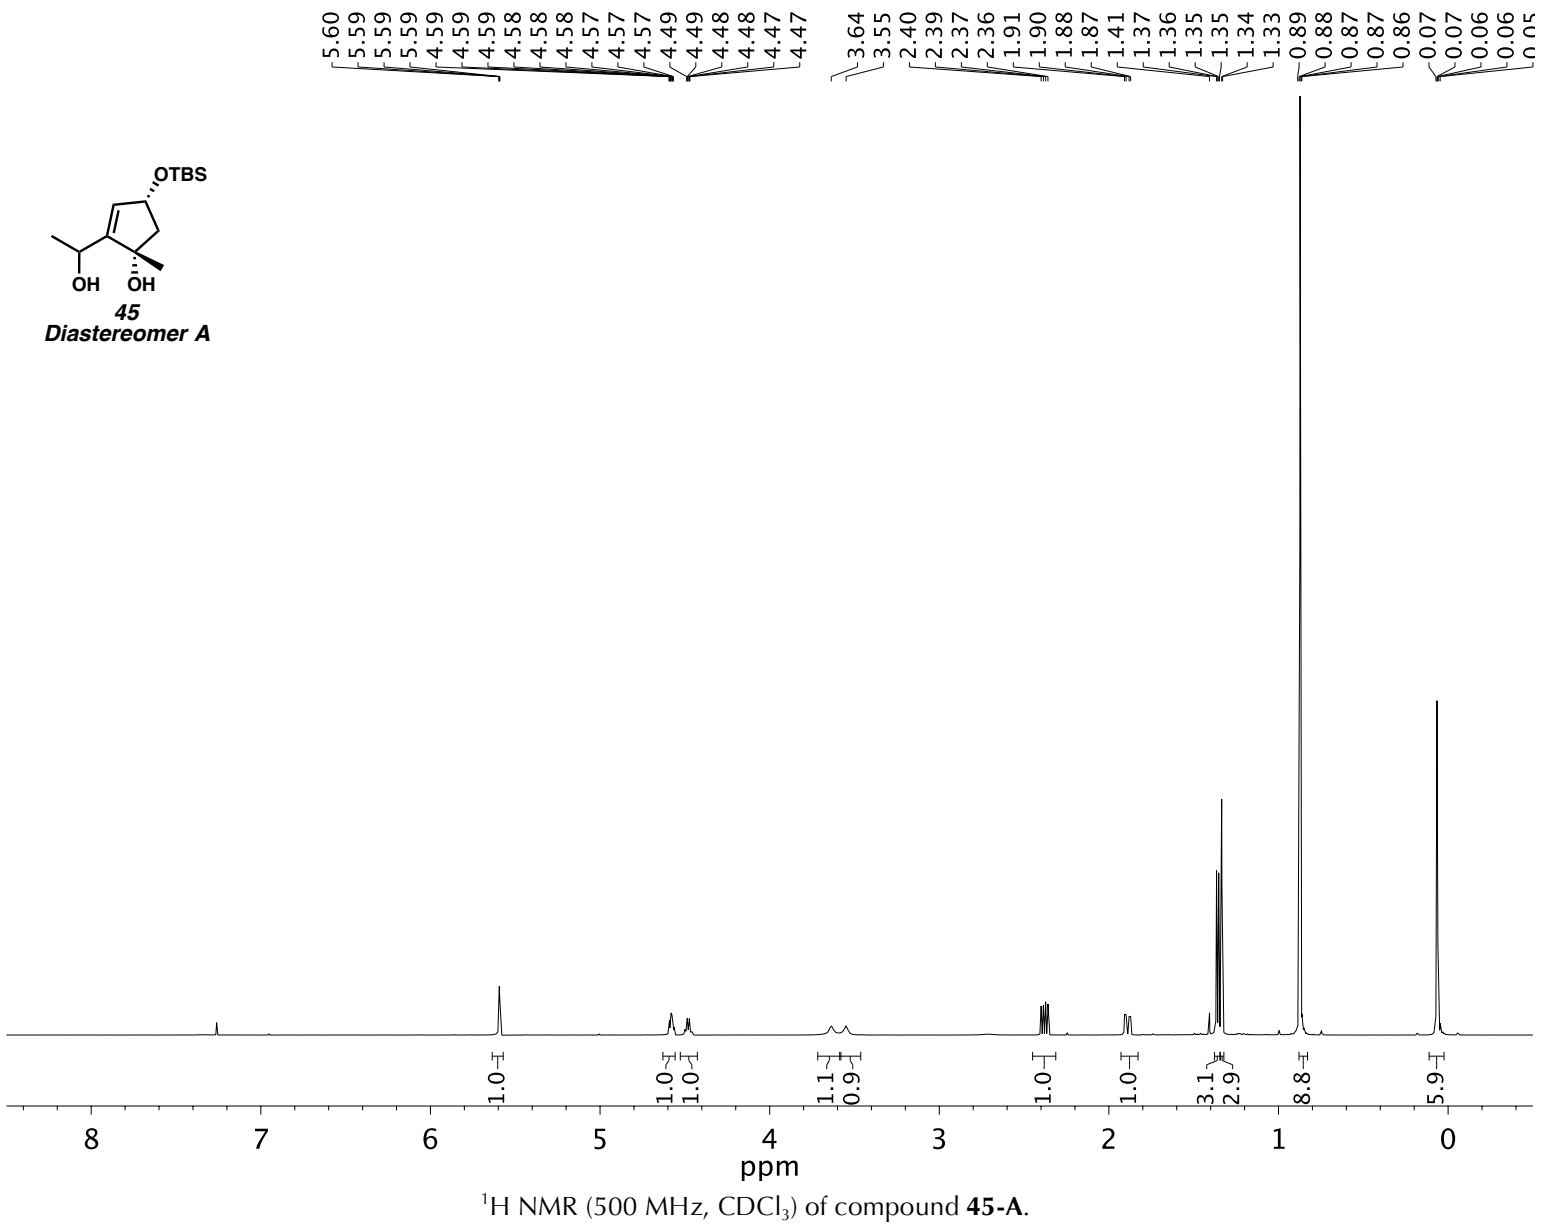

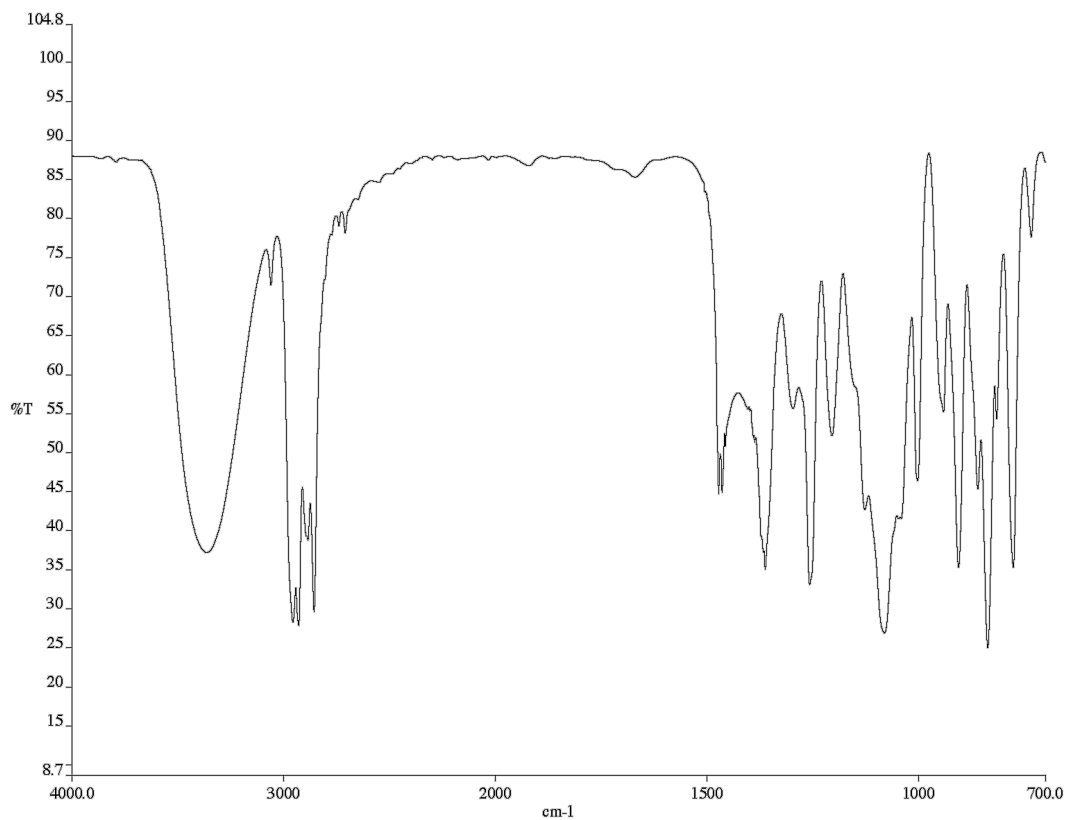

Infrared spectrum (Thin Film, NaCl) of compound **45-A**.

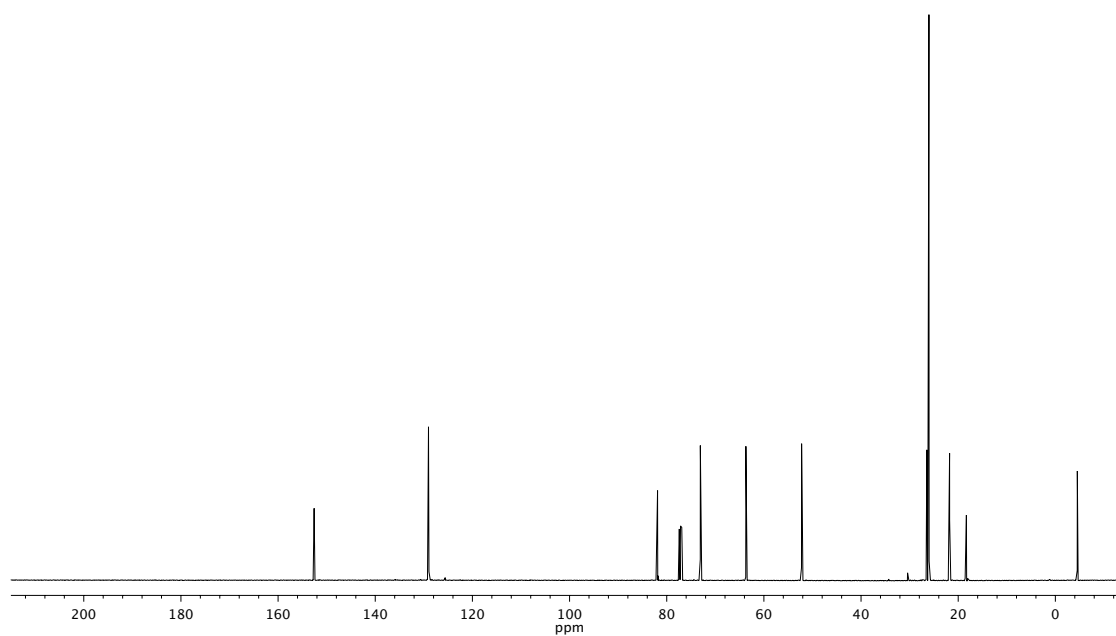

<sup>13</sup>C NMR (126 MHz, CDCl<sub>3</sub>) of compound **45-A**.

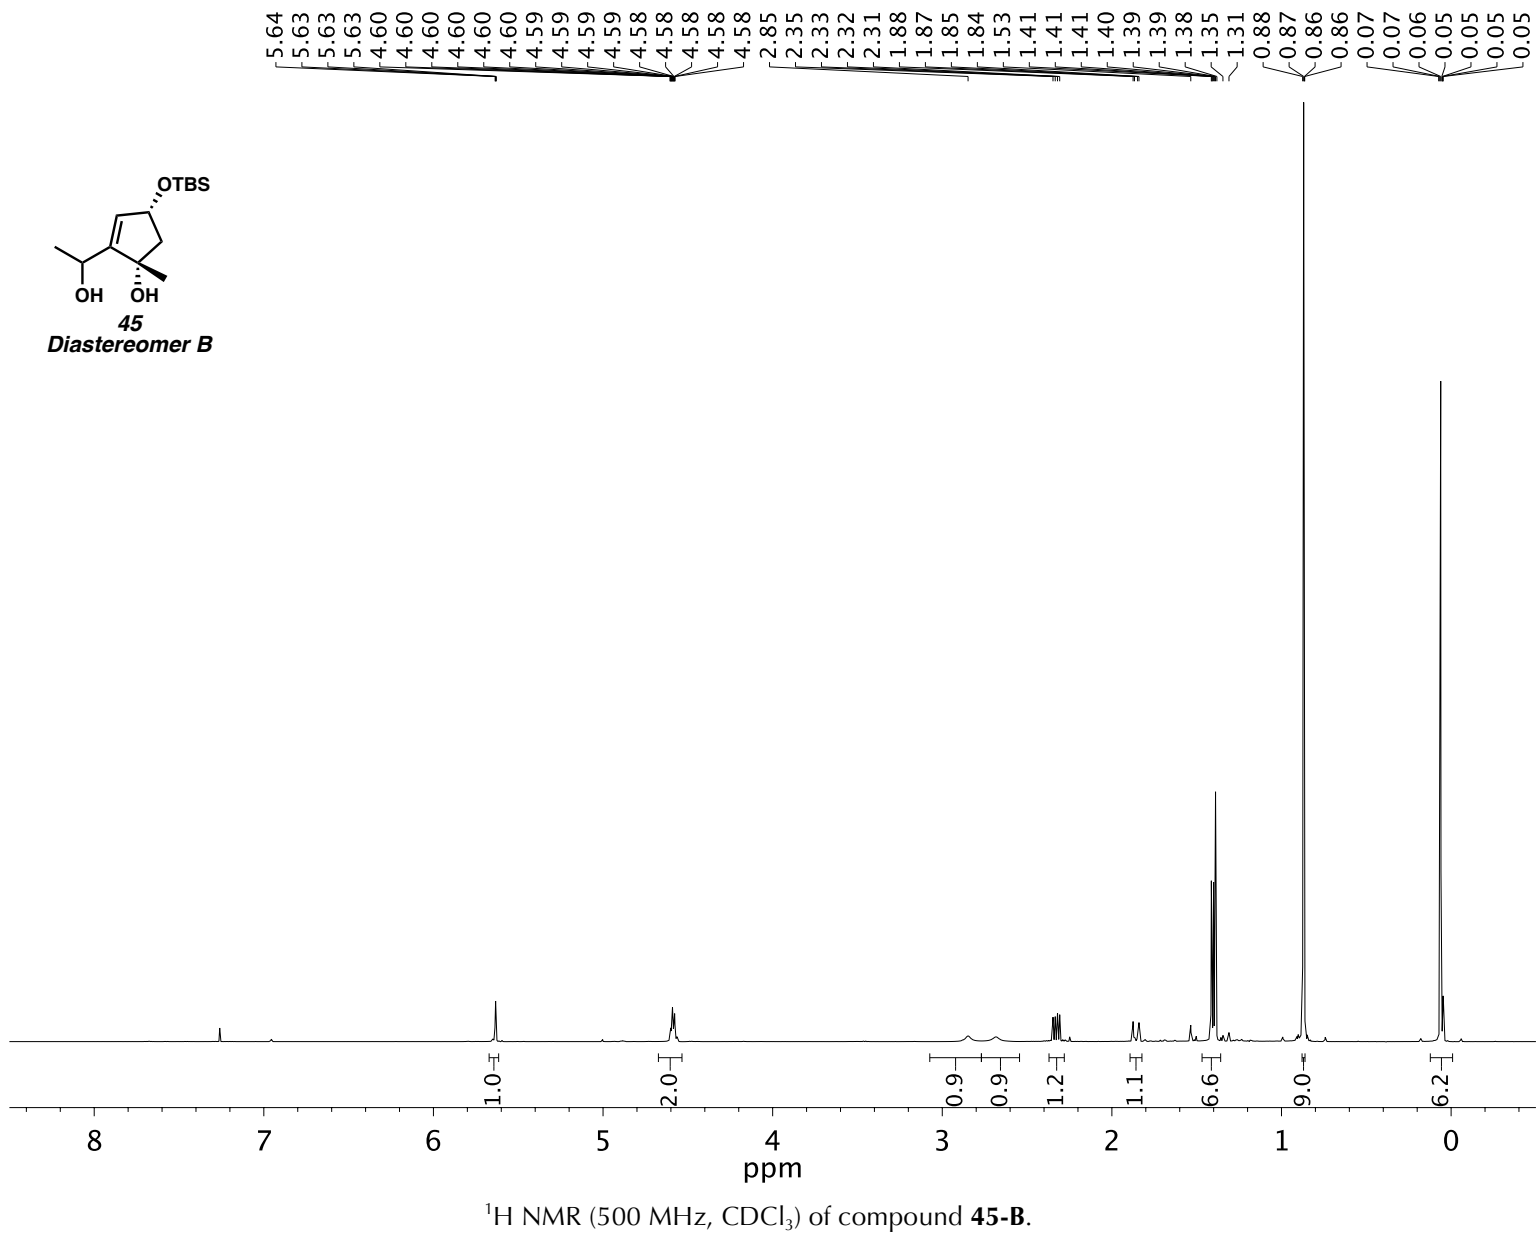

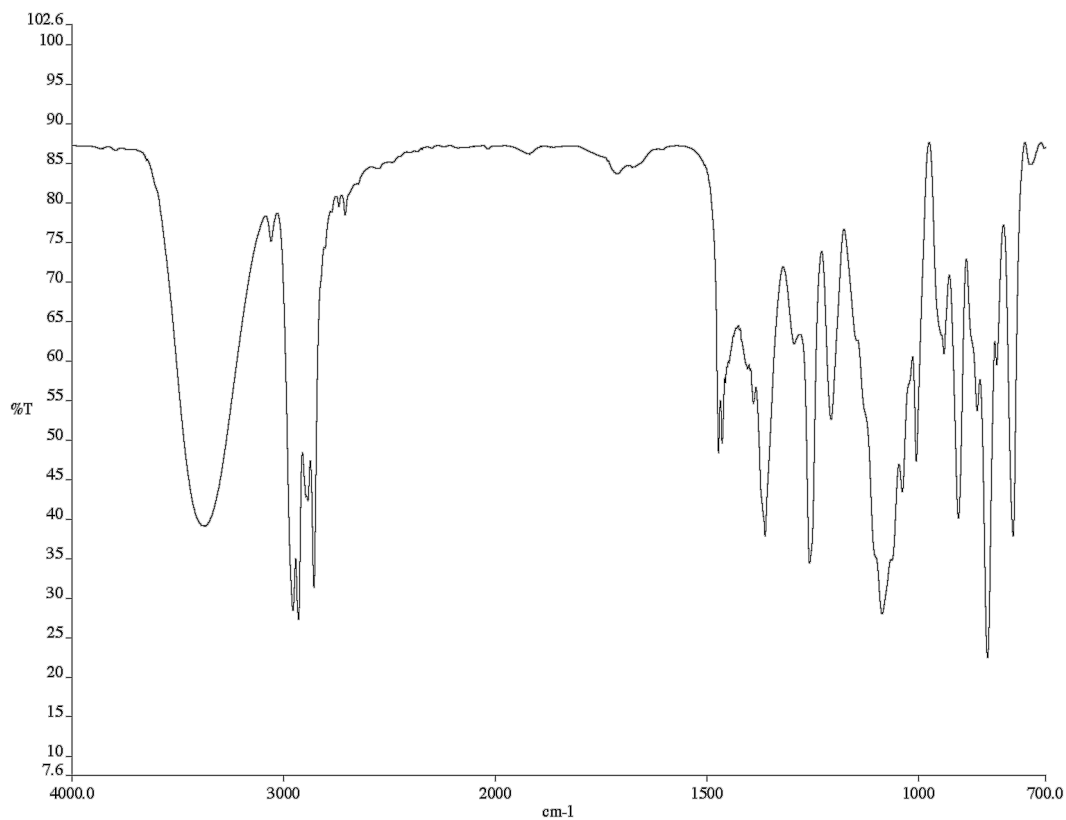

Infrared spectrum (Thin Film, NaCl) of compound **45-B**.

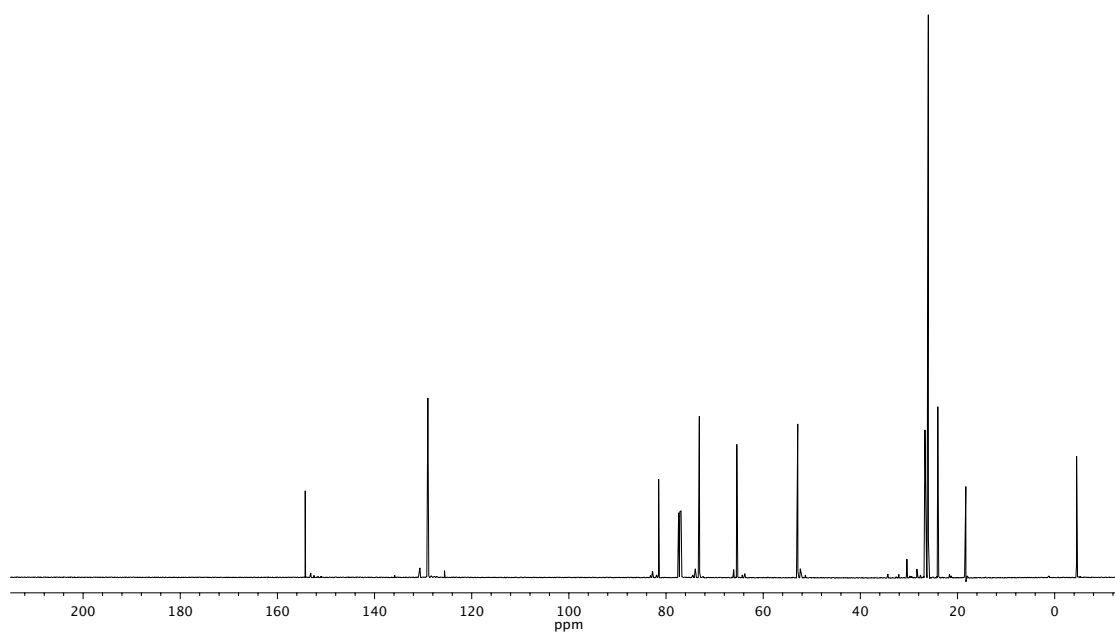

<sup>13</sup>C NMR (126 MHz, CDCl<sub>3</sub>) of compound **45-B**.

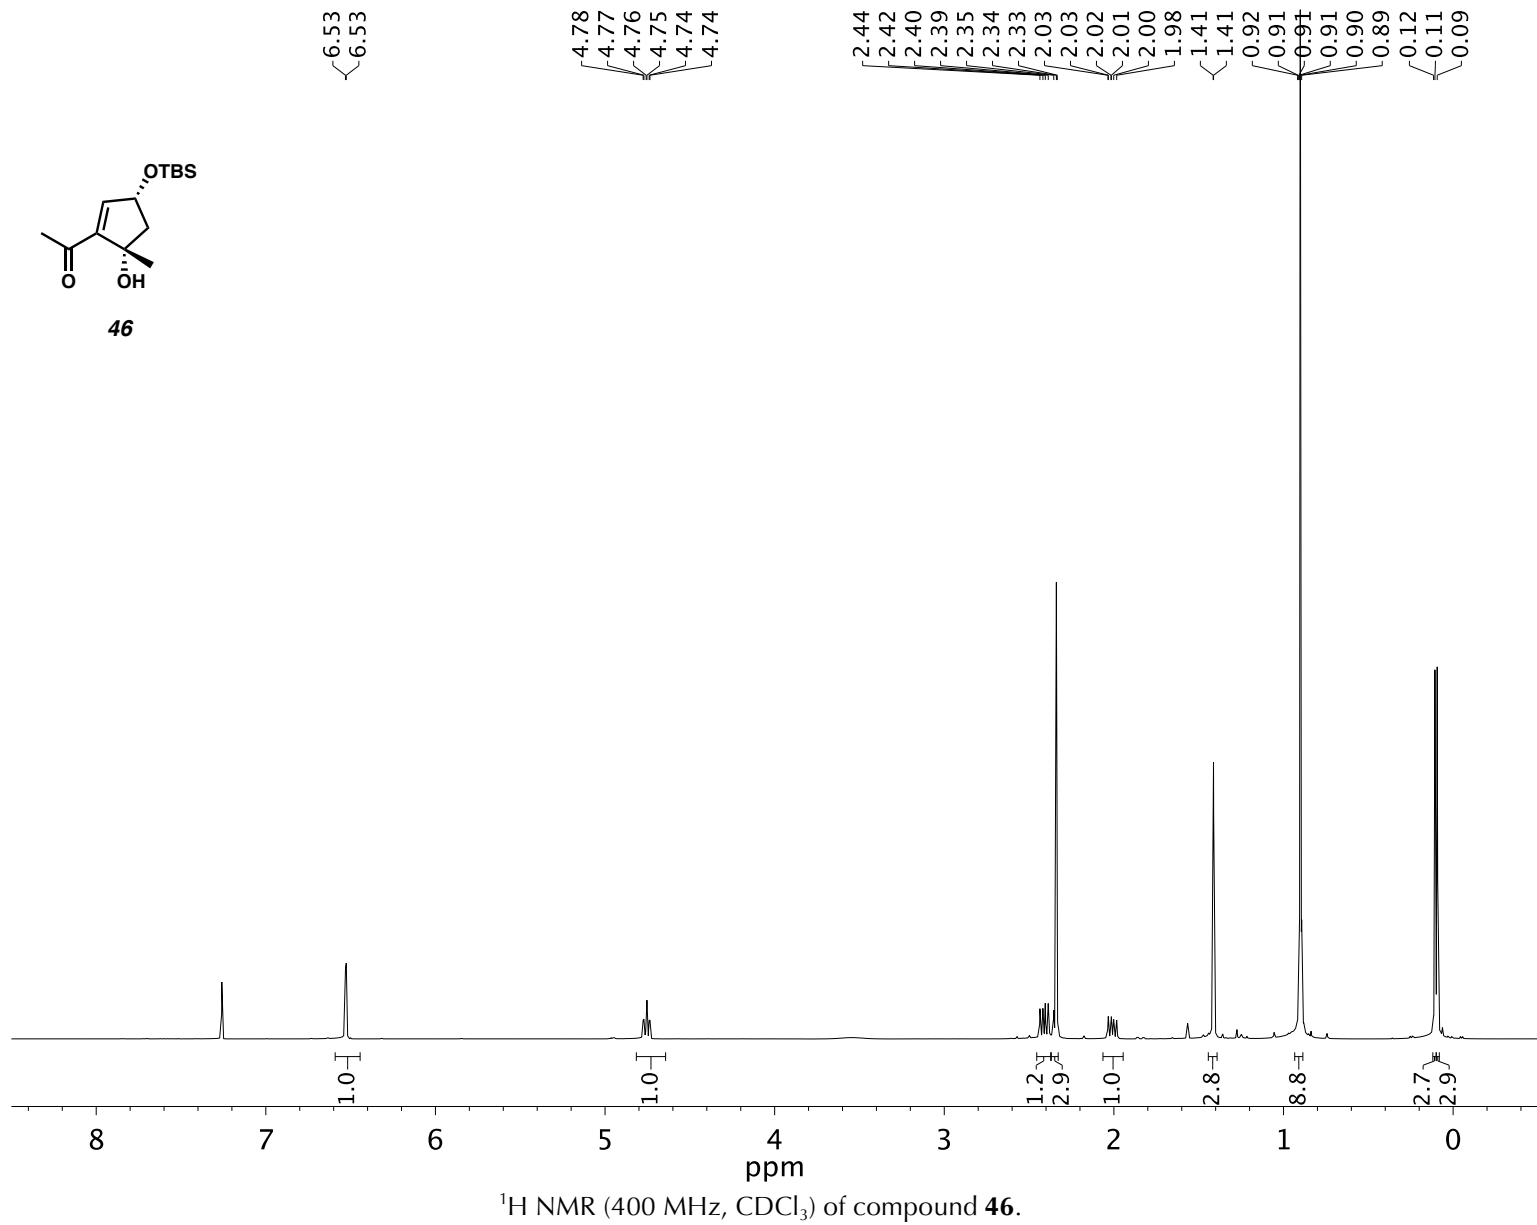

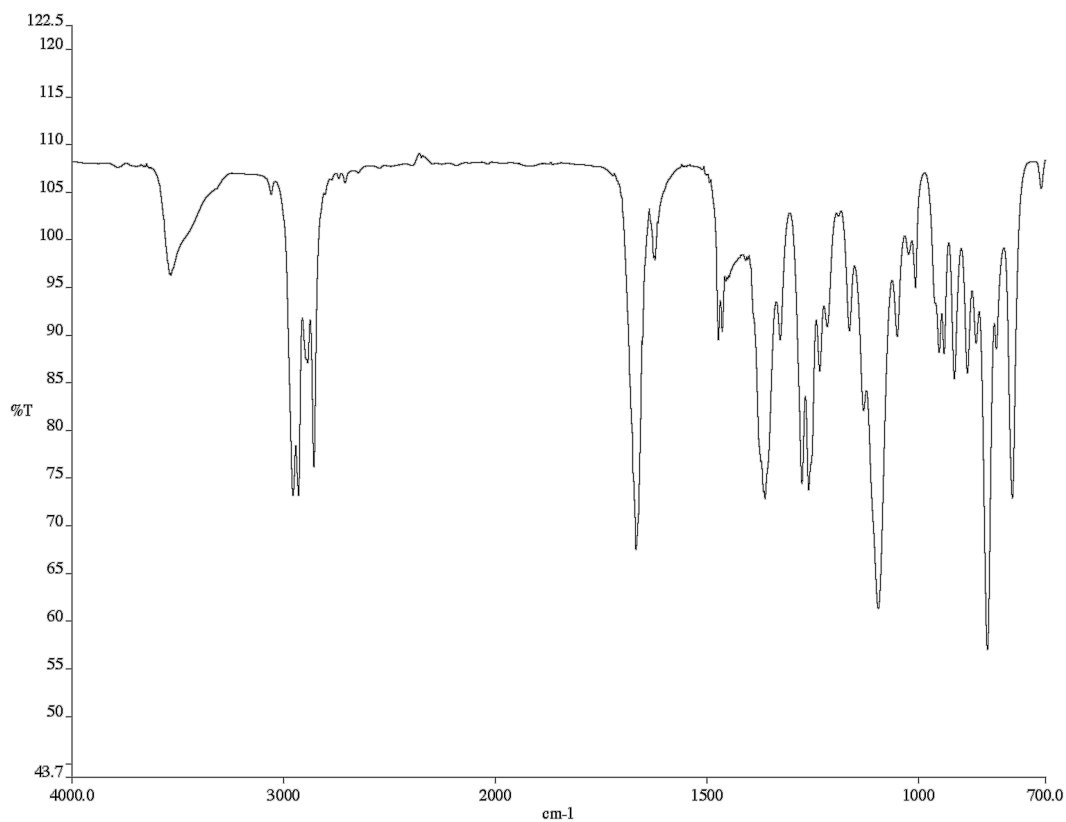

Infrared spectrum (Thin Film, NaCl) of compound **46**.

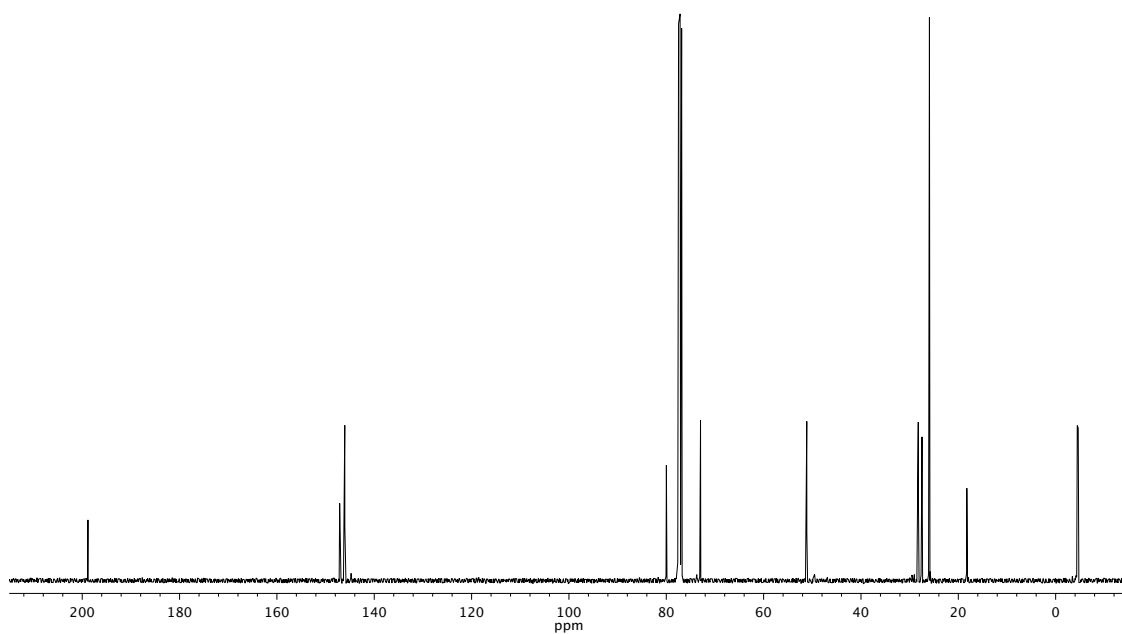

<sup>13</sup>C NMR (101 MHz, CDCl<sub>3</sub>) of compound **46**.

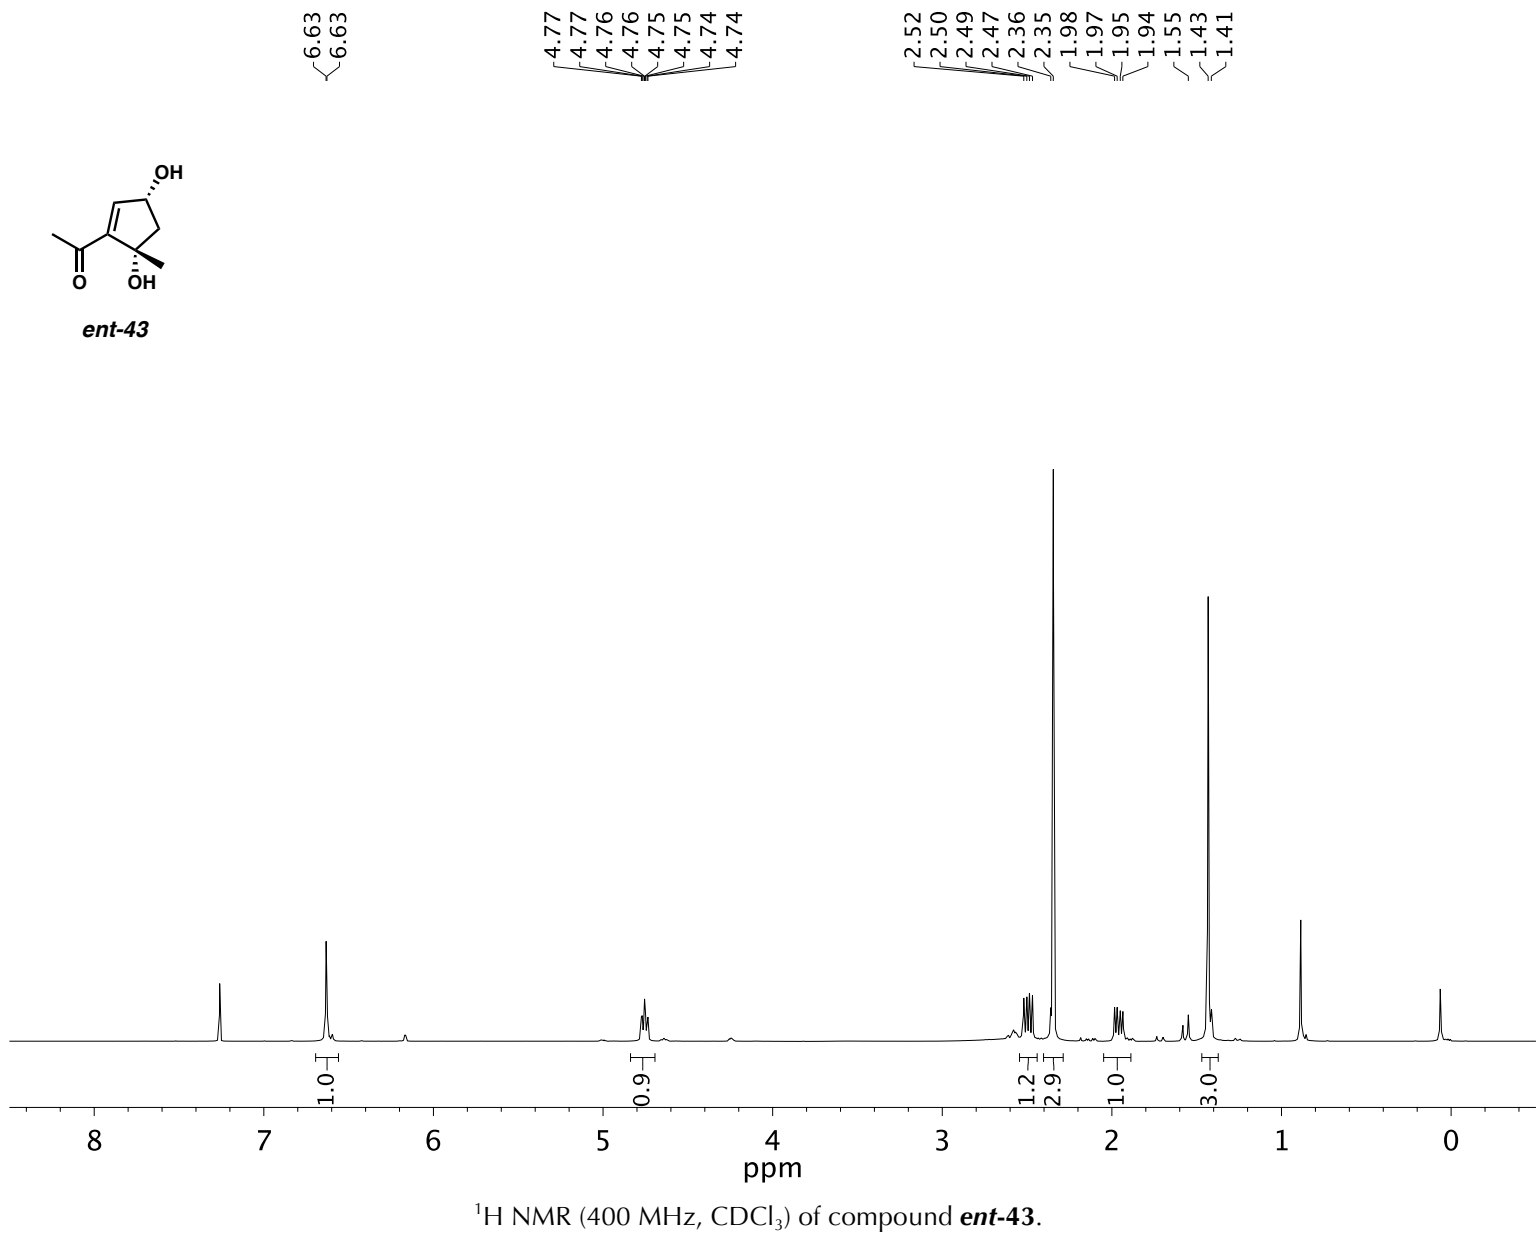

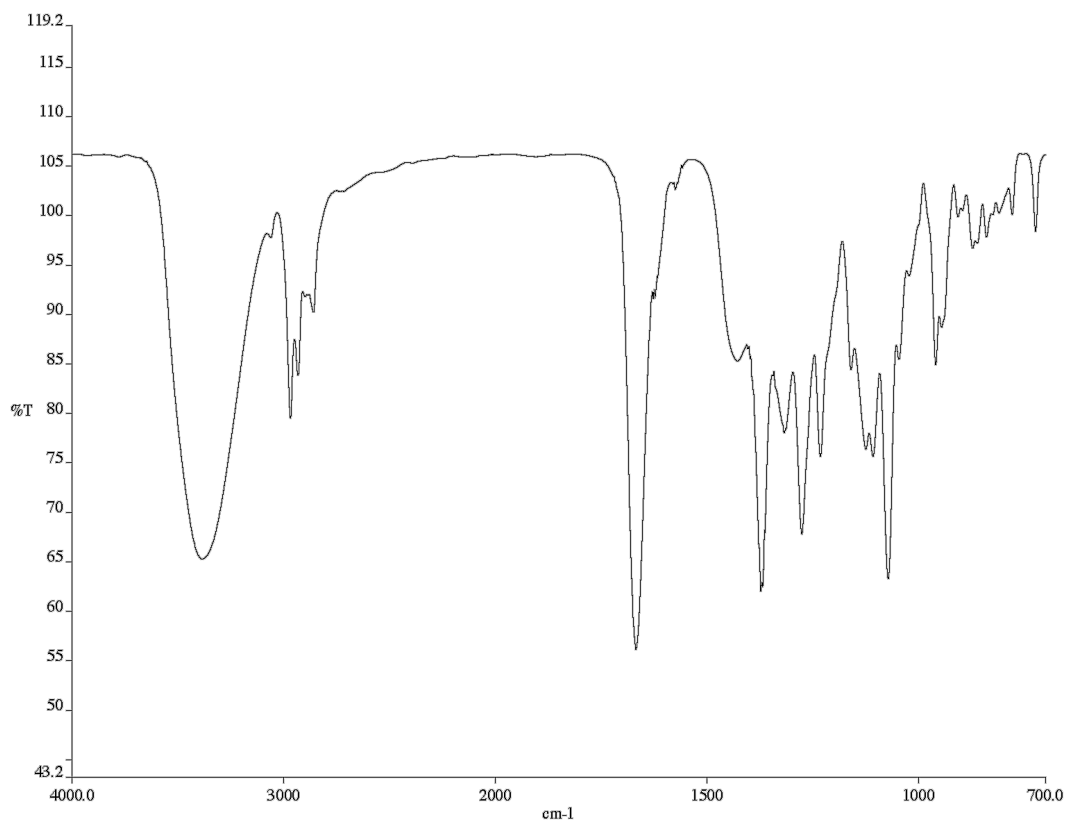

Infrared spectrum (Thin Film, NaCl) of compound **ent-43**.

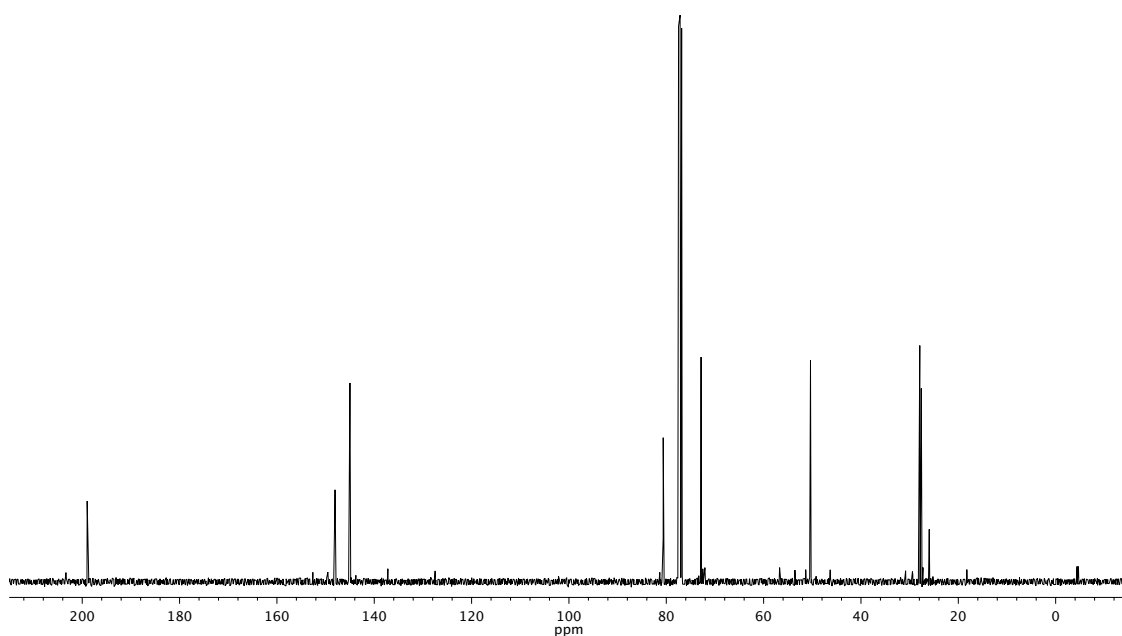

<sup>13</sup>C NMR (101 MHz, CDCl<sub>3</sub>) of compound **ent-43**.



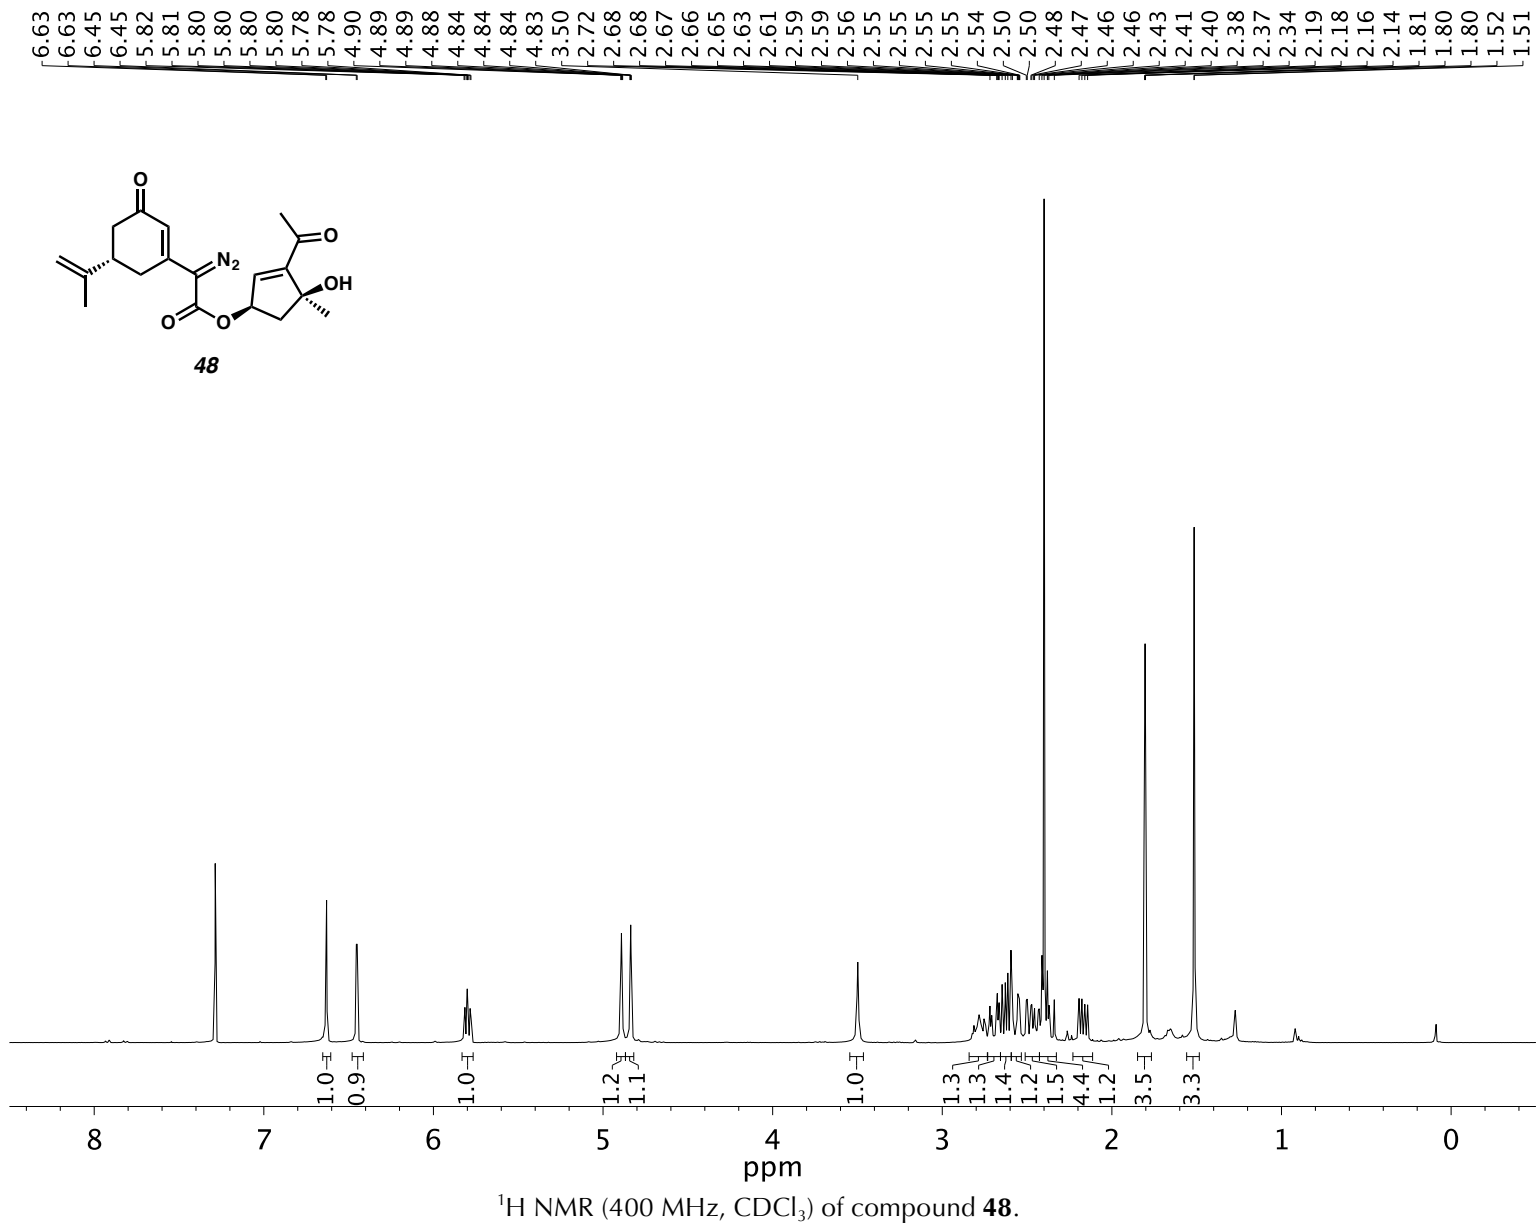

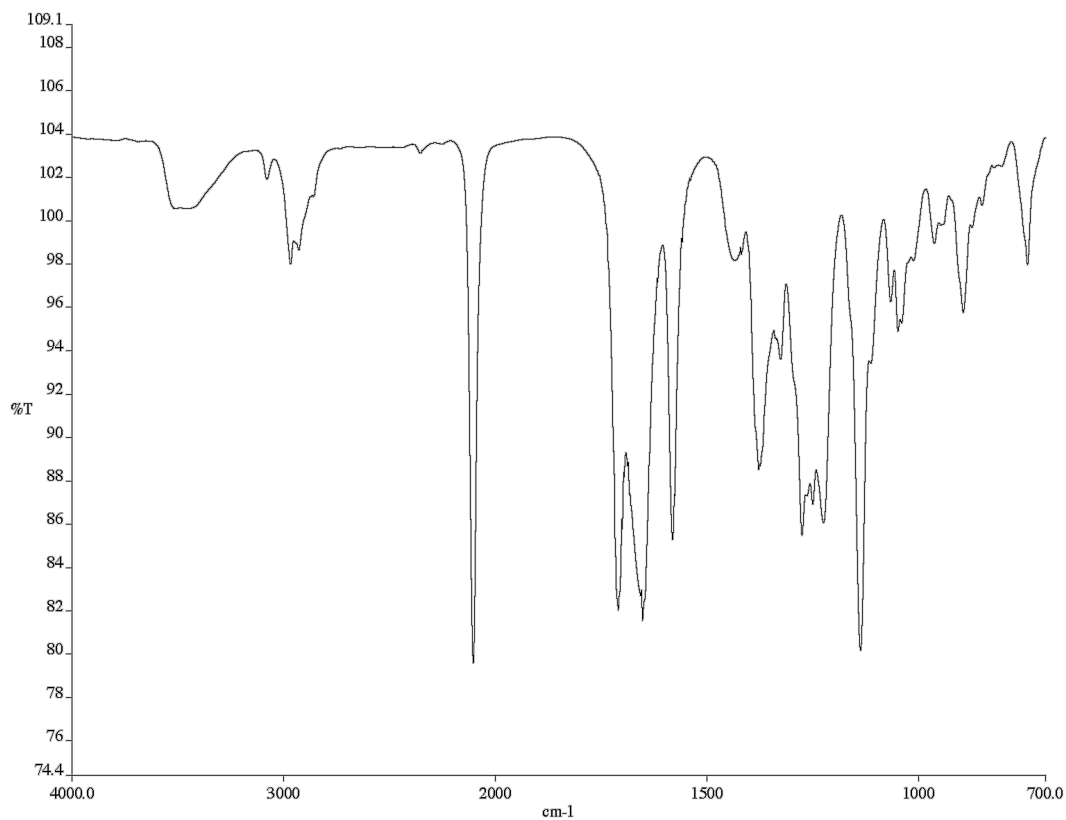

Infrared spectrum (Thin Film, NaCl) of compound **48**.

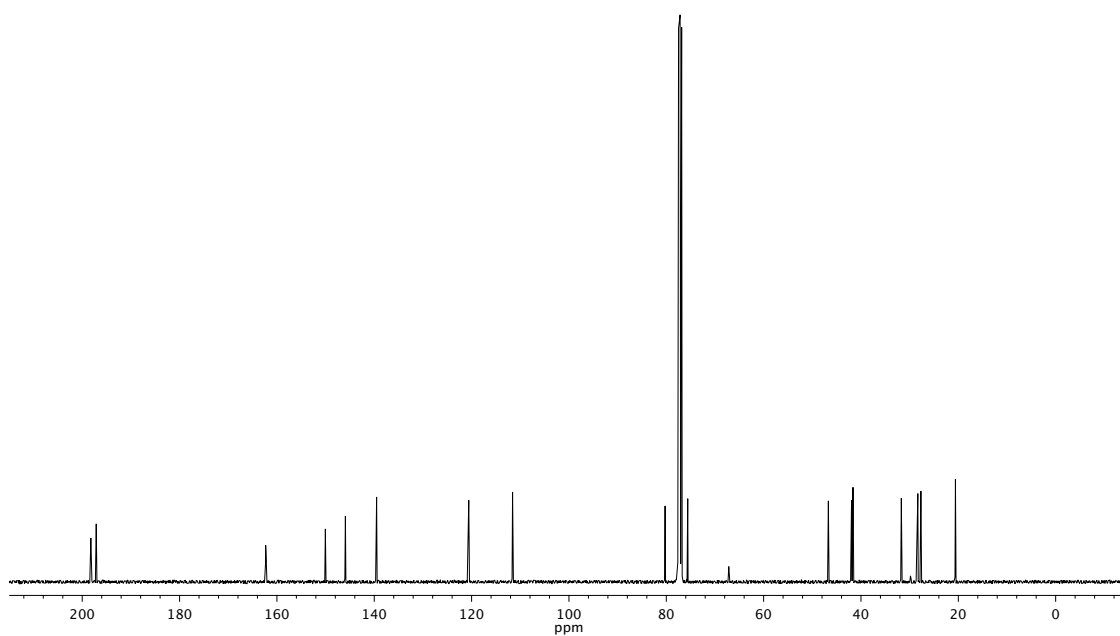

<sup>13</sup>C NMR (101 MHz, CDCl<sub>3</sub>) of compound **48**.

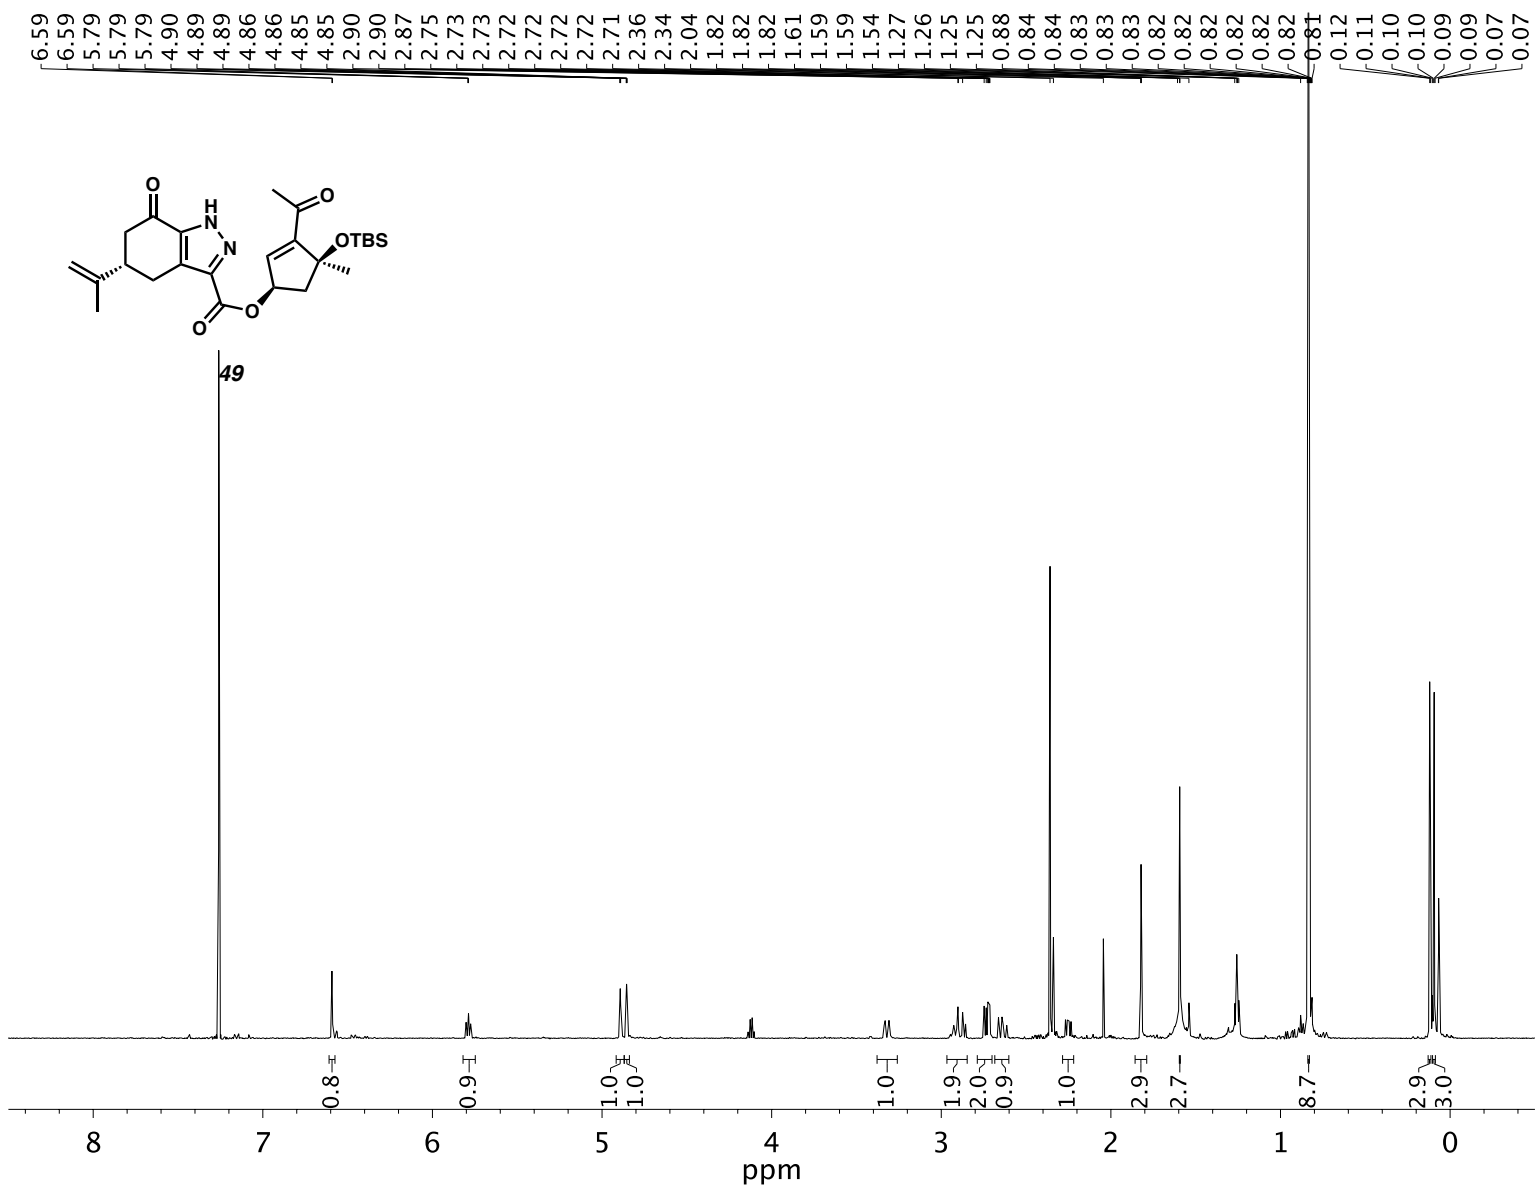

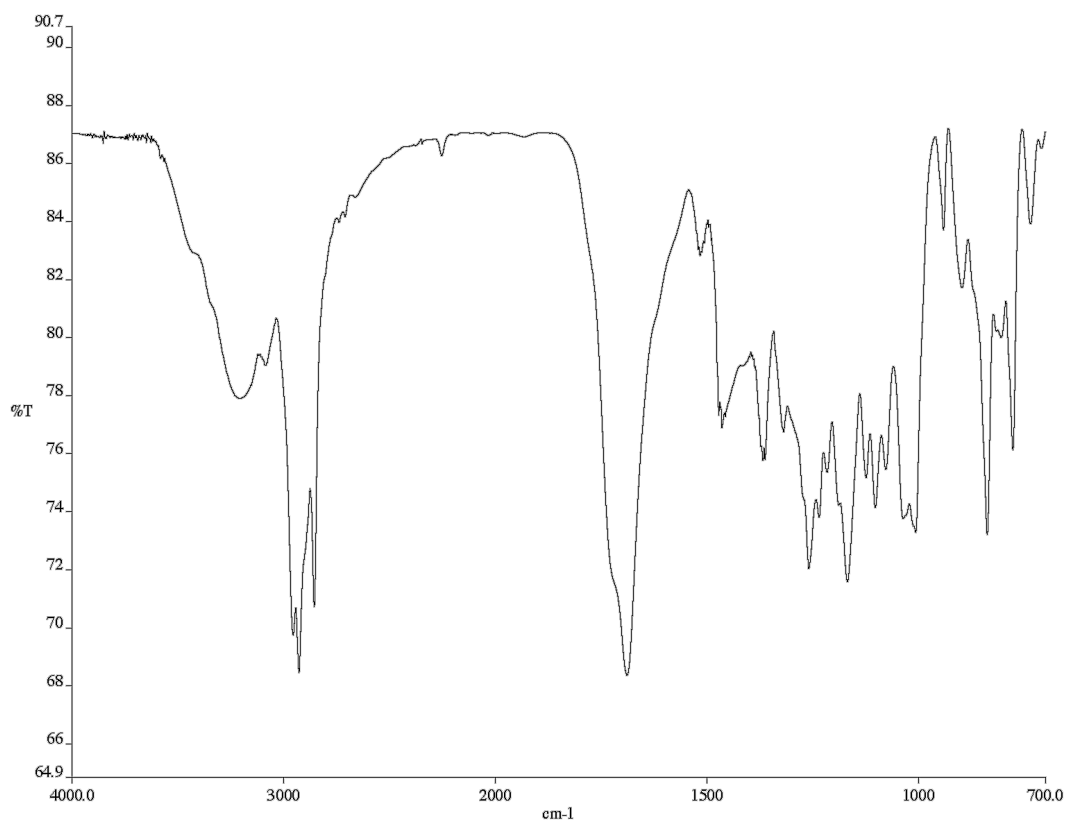

Infrared spectrum (Thin Film, NaCl) of compound **49**.

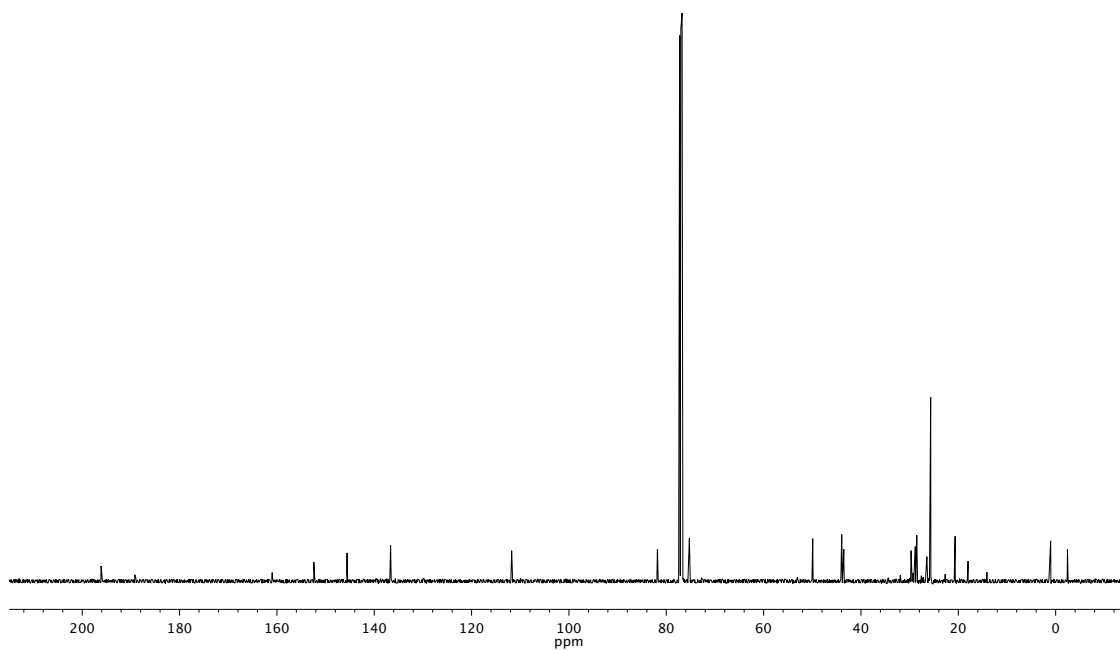

<sup>13</sup>C NMR (126 MHz, CDCl<sub>3</sub>) of compound **49**.

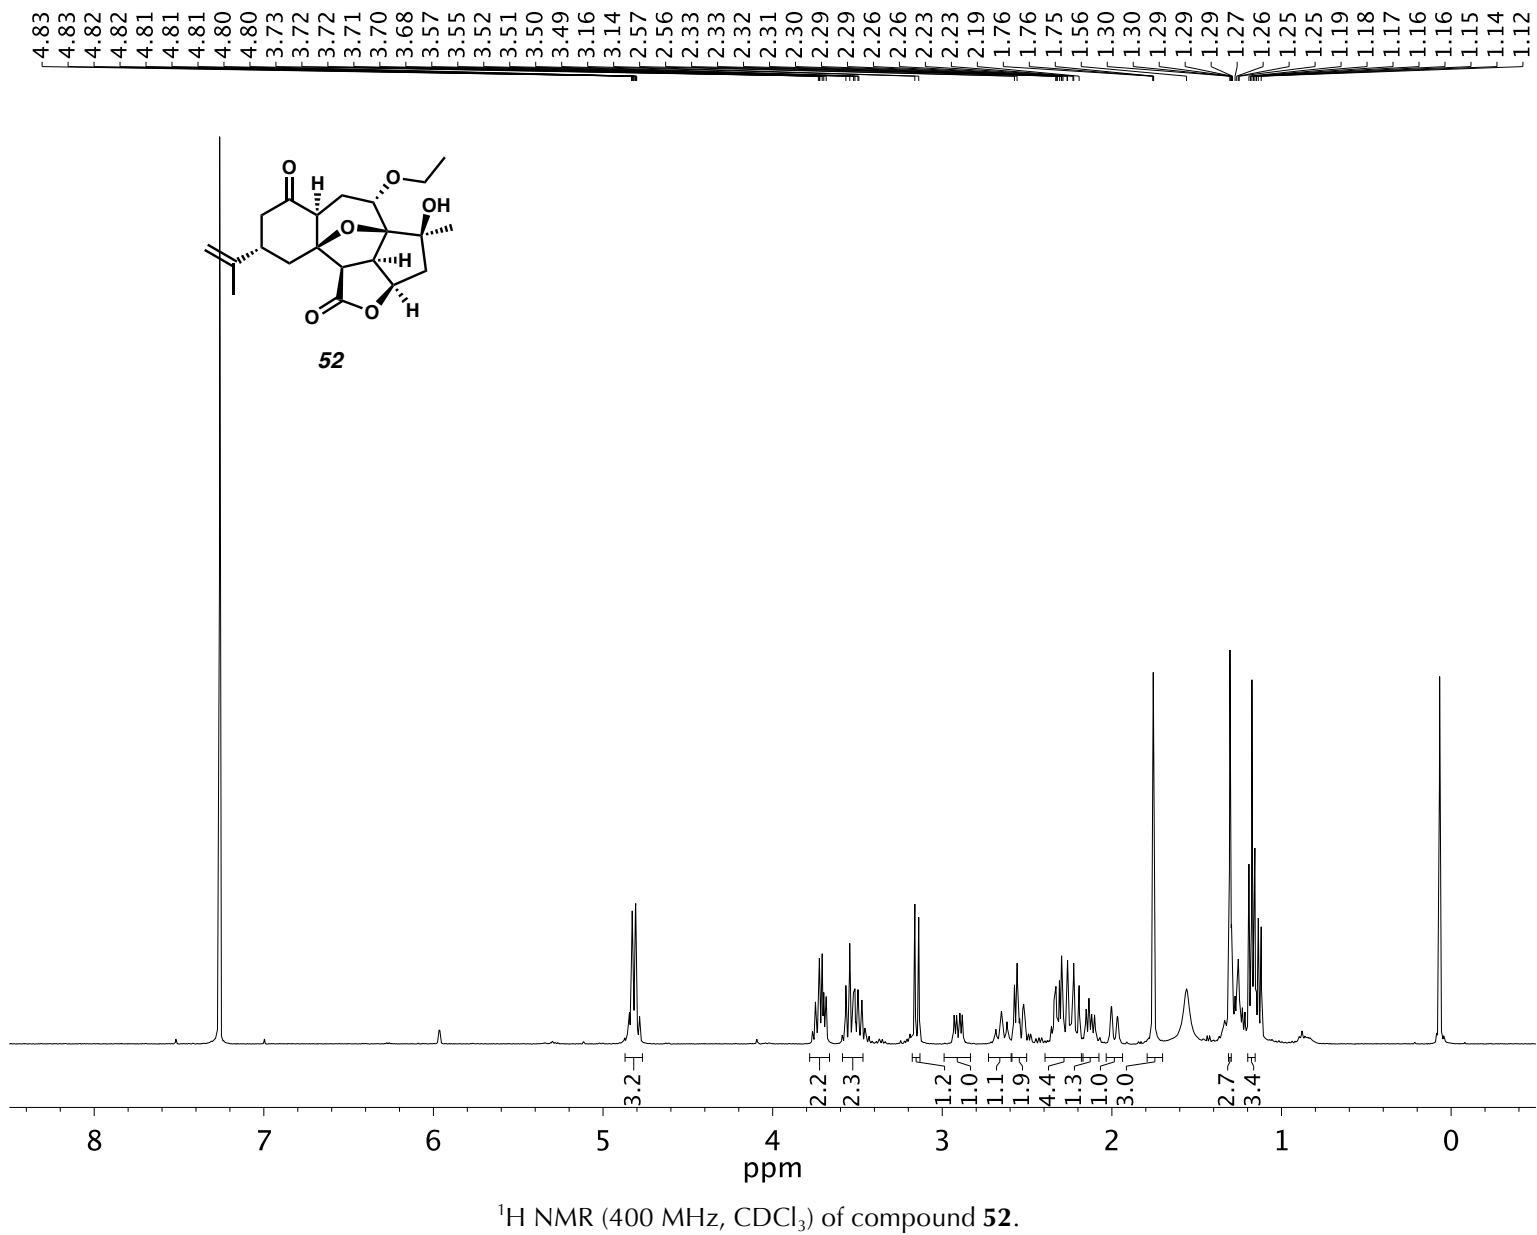

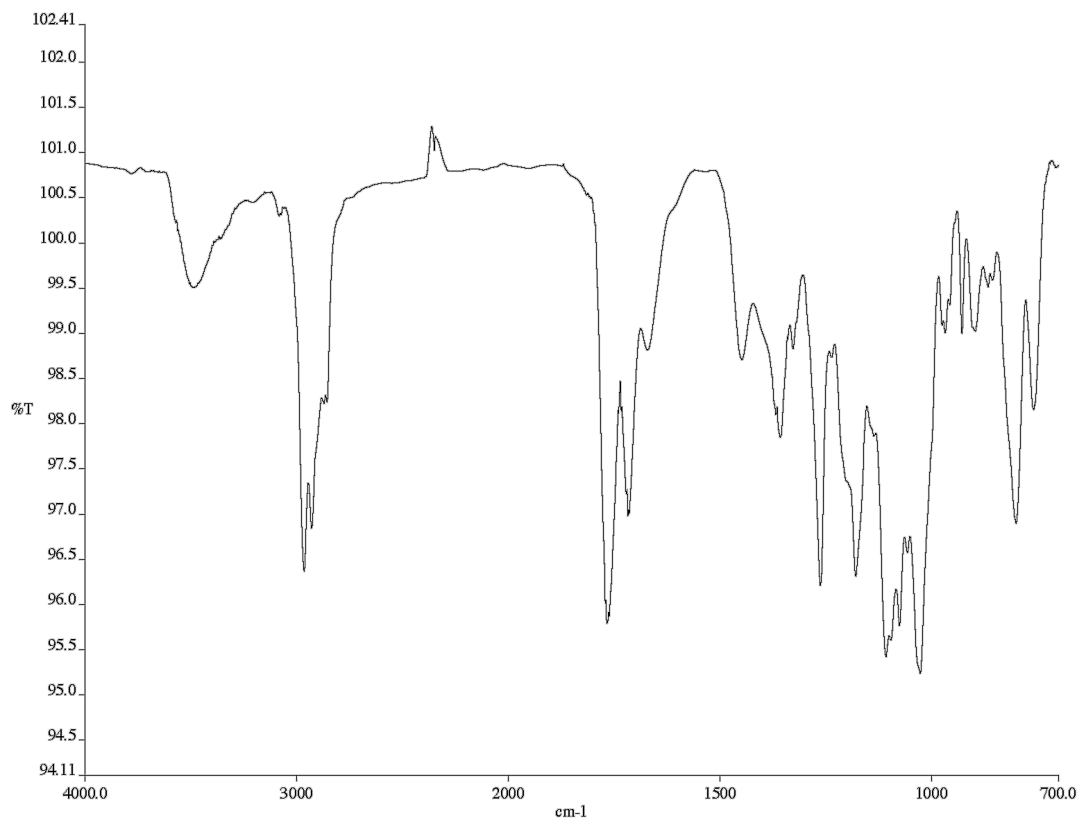

Infrared spectrum (Thin Film, NaCl) of compound **52**.

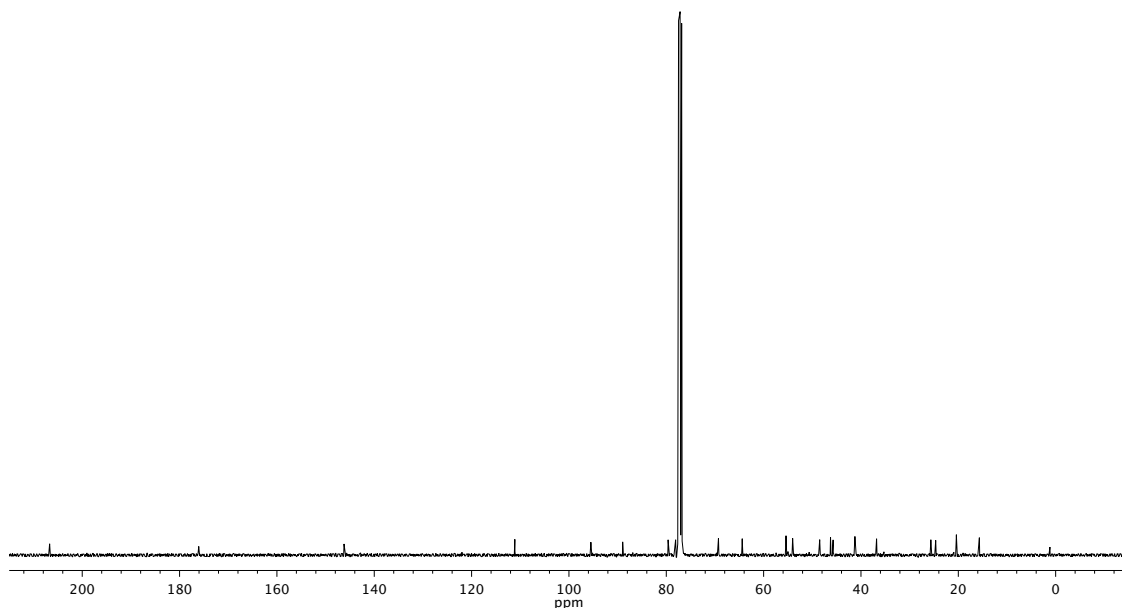

<sup>13</sup>C NMR (101 MHz, CDCl<sub>3</sub>) of compound **52**.

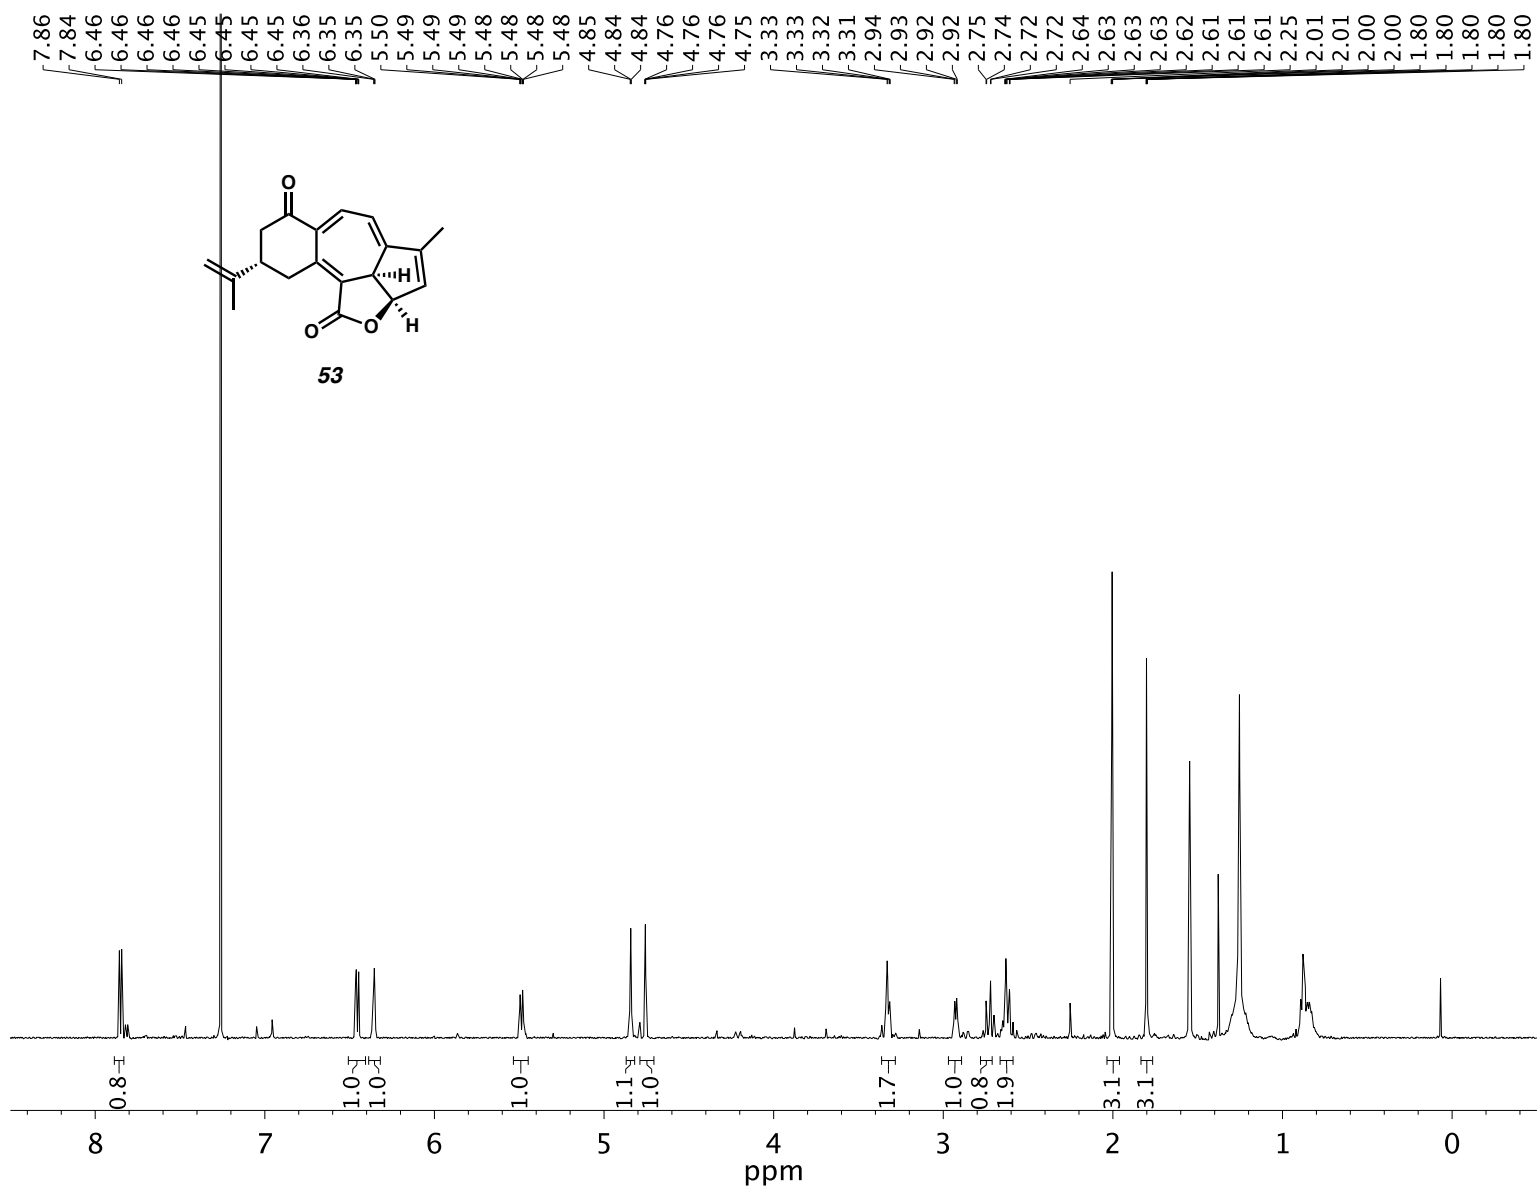 $^1\text{H}$  NMR (500 MHz,  $\text{CDCl}_3$ ) of compound 53.

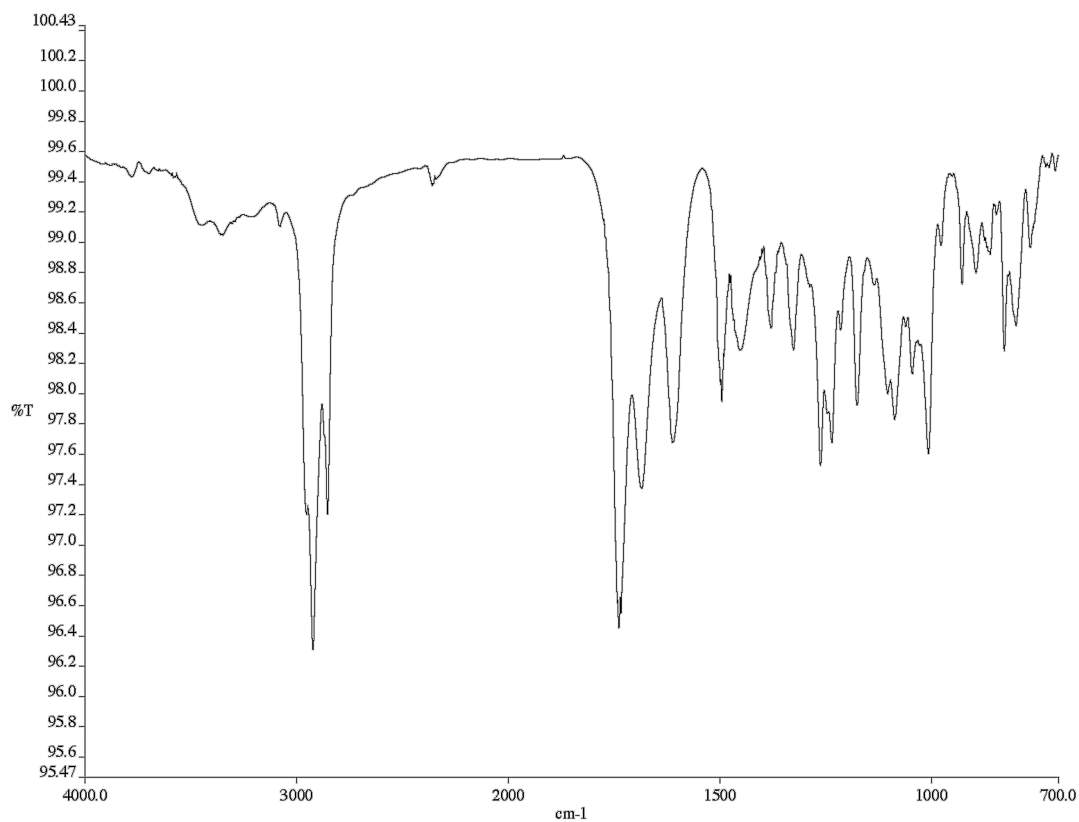

Infrared spectrum (Thin Film, NaCl) of compound **53**.

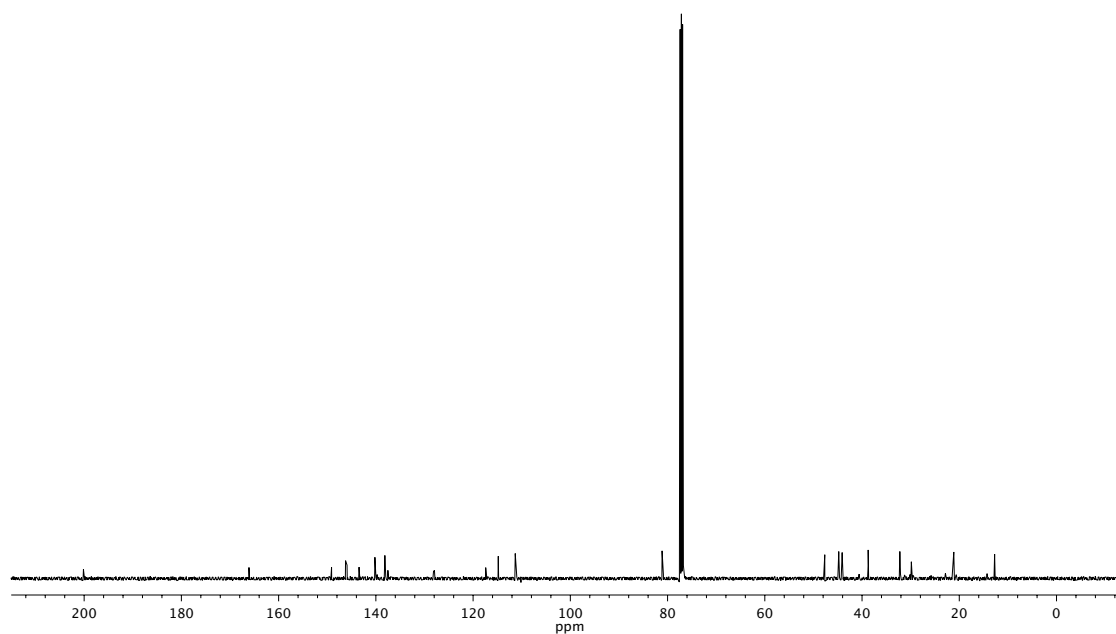

<sup>13</sup>C NMR (126 MHz, CDCl<sub>3</sub>) of compound **53**.



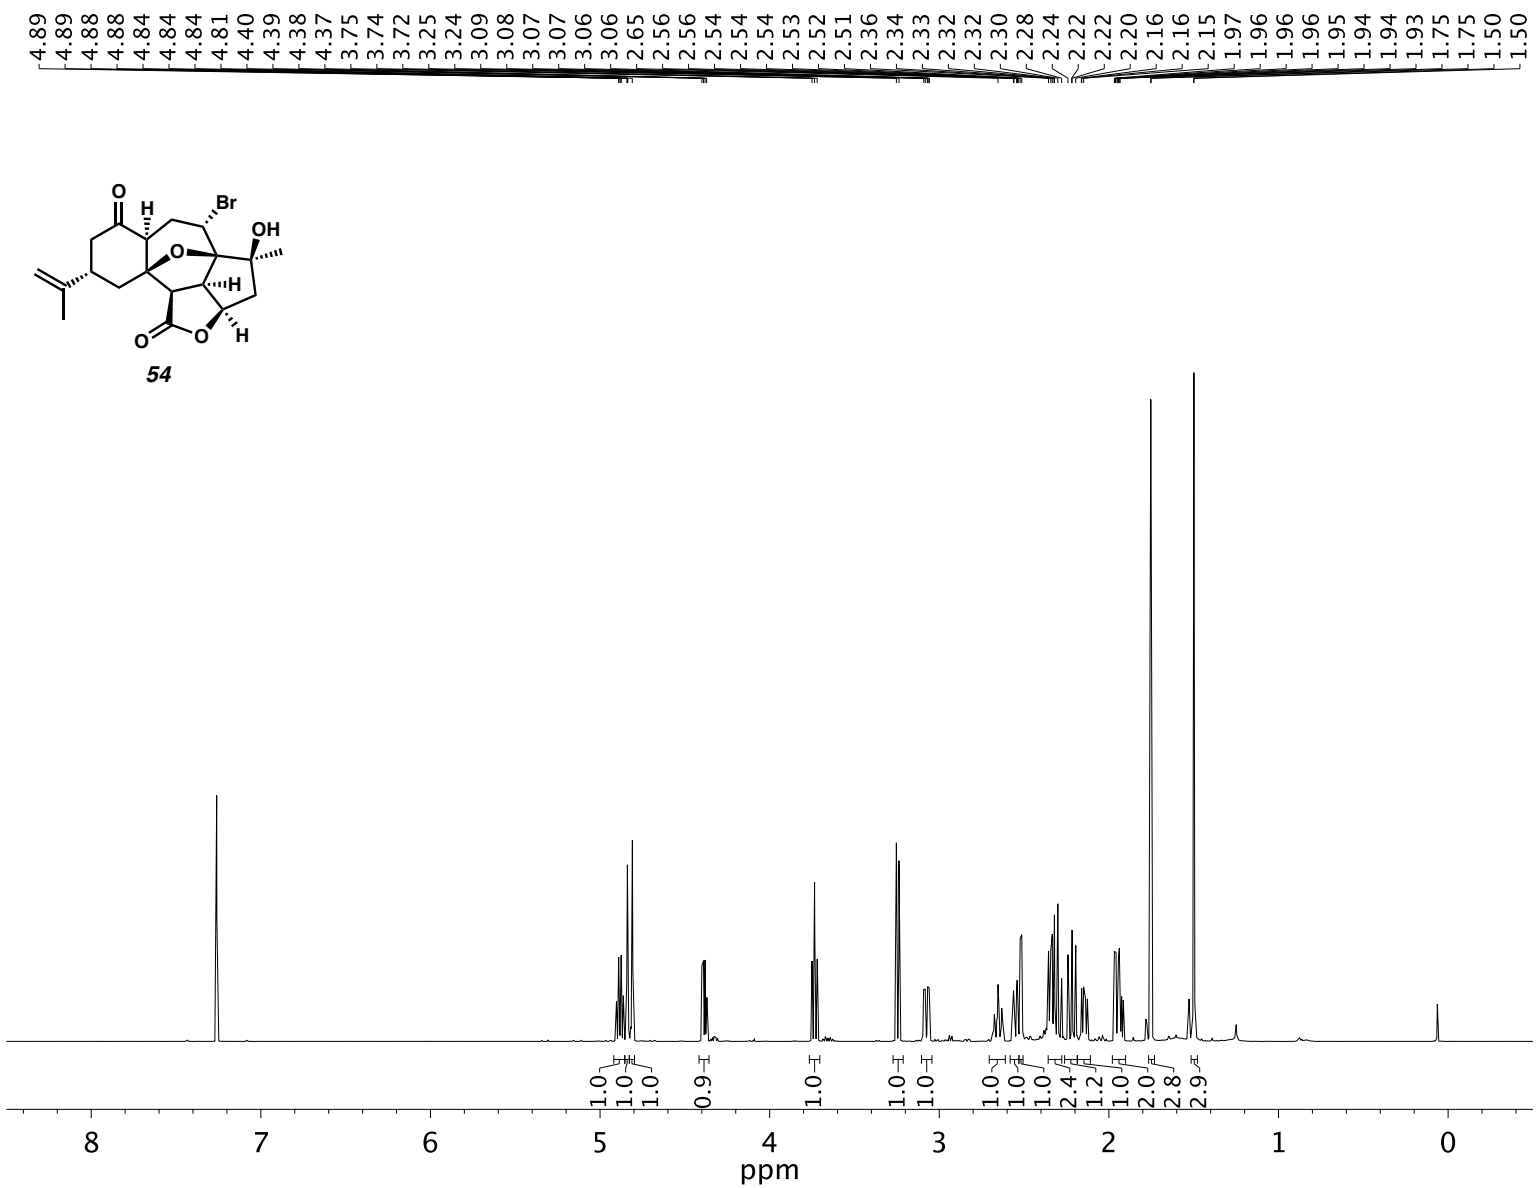

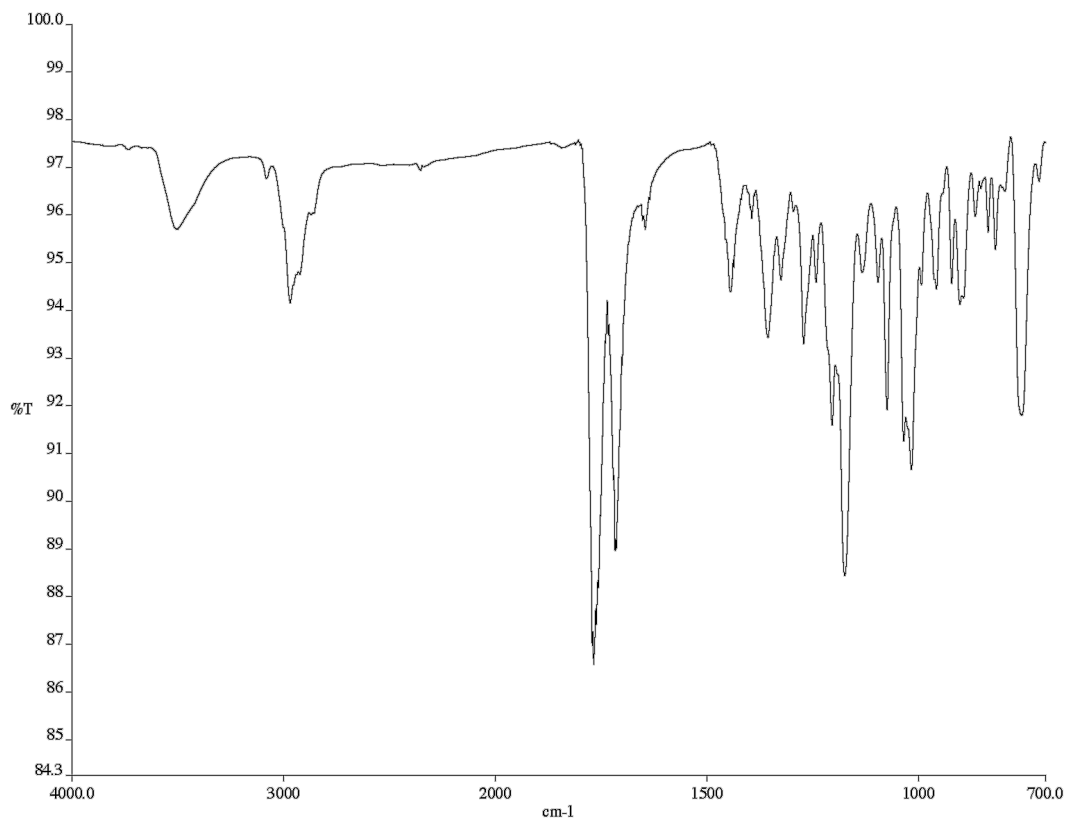

Infrared spectrum (Thin Film, NaCl) of compound **54**.

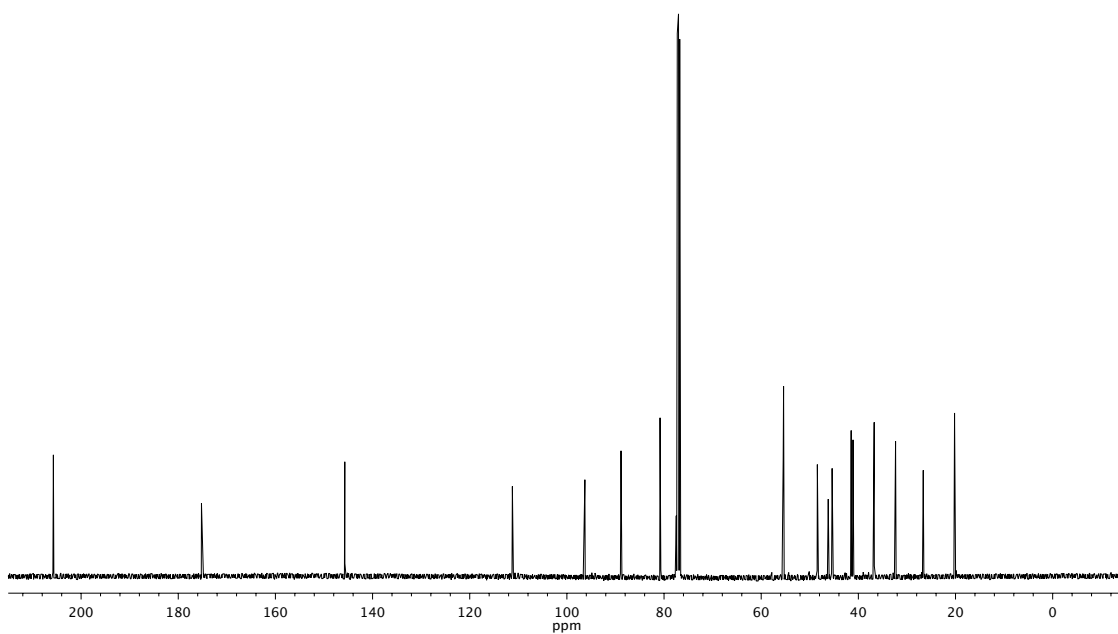

<sup>13</sup>C NMR (126 MHz, CDCl<sub>3</sub>) of compound **54**.

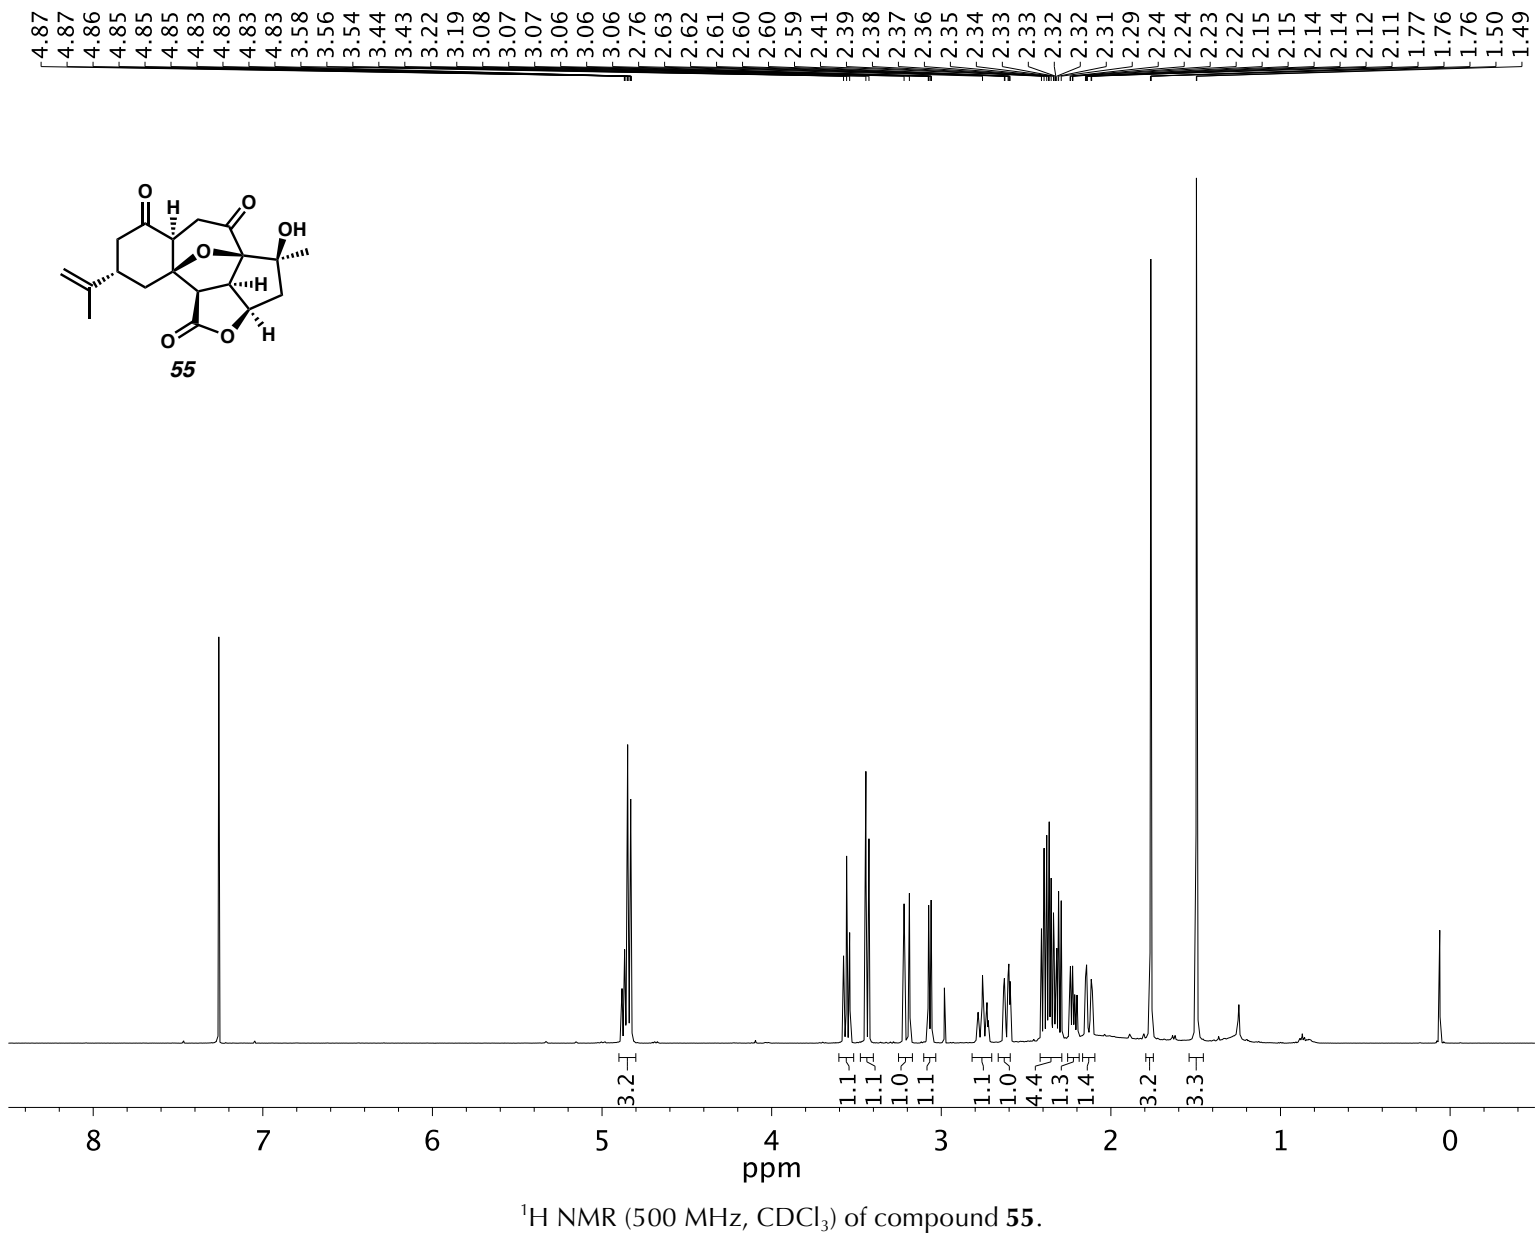

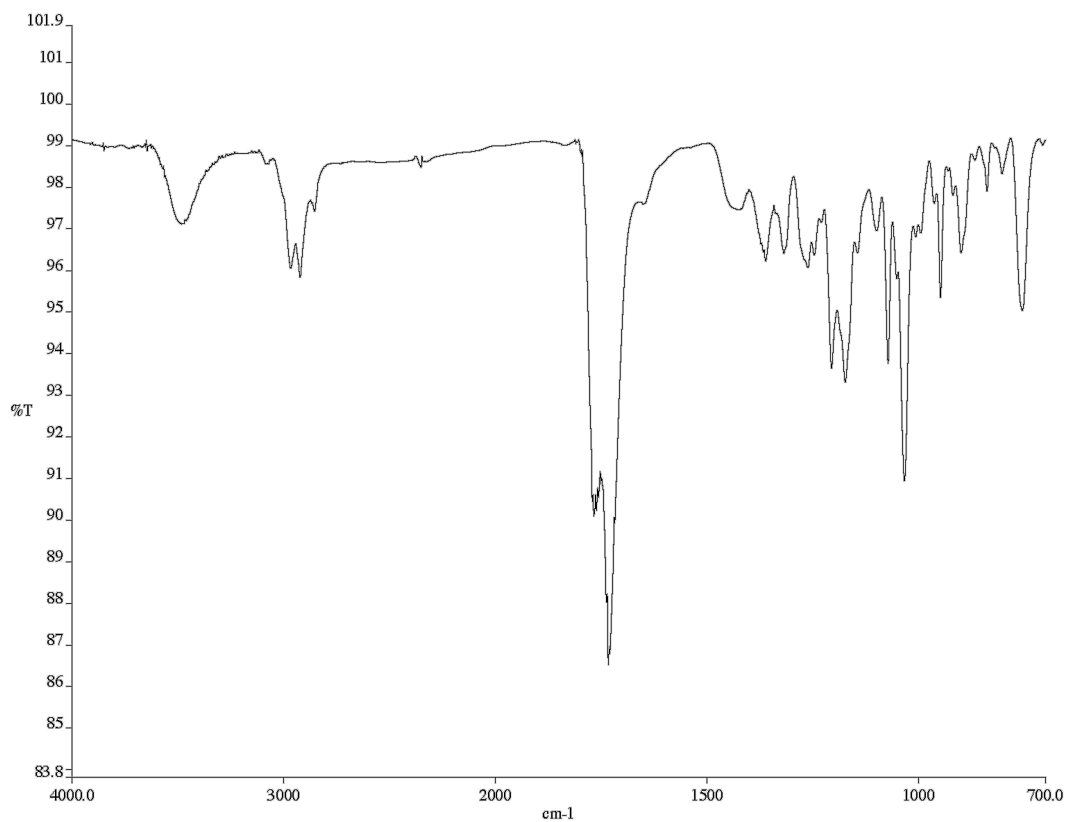

Infrared spectrum (Thin Film, NaCl) of compound **55**.

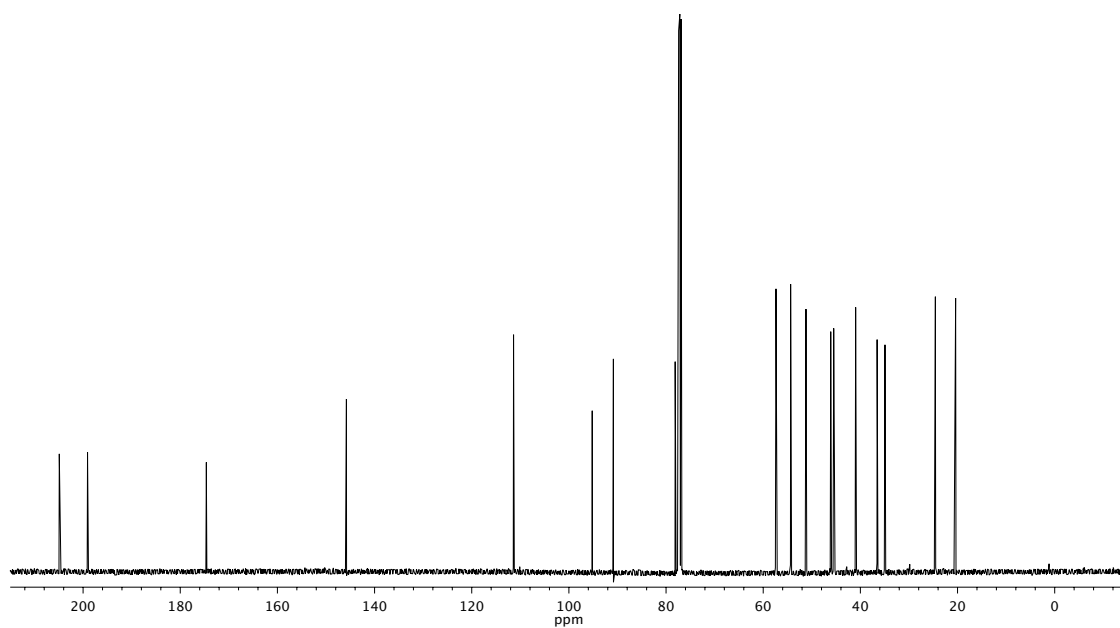

<sup>13</sup>C NMR (126 MHz, CDCl<sub>3</sub>) of compound **55**.

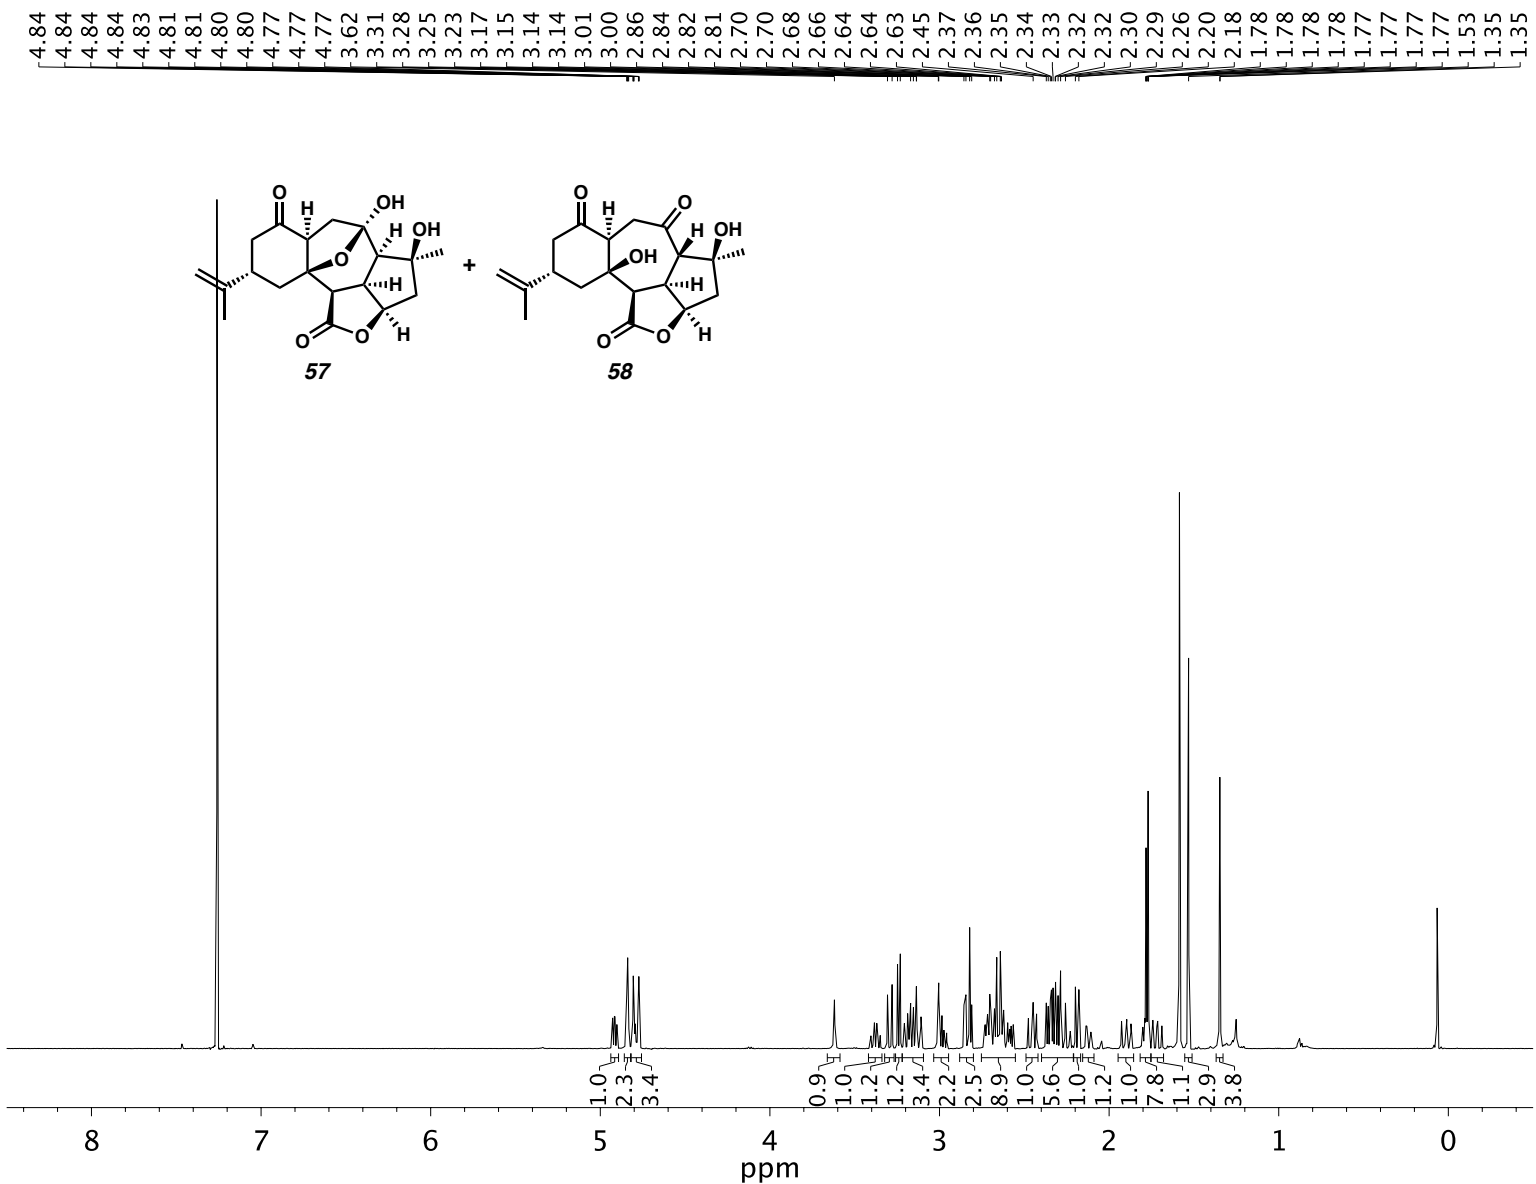

$^1\text{H NMR}$  (500 MHz,  $\text{CDCl}_3$ ) of compound 57/58.

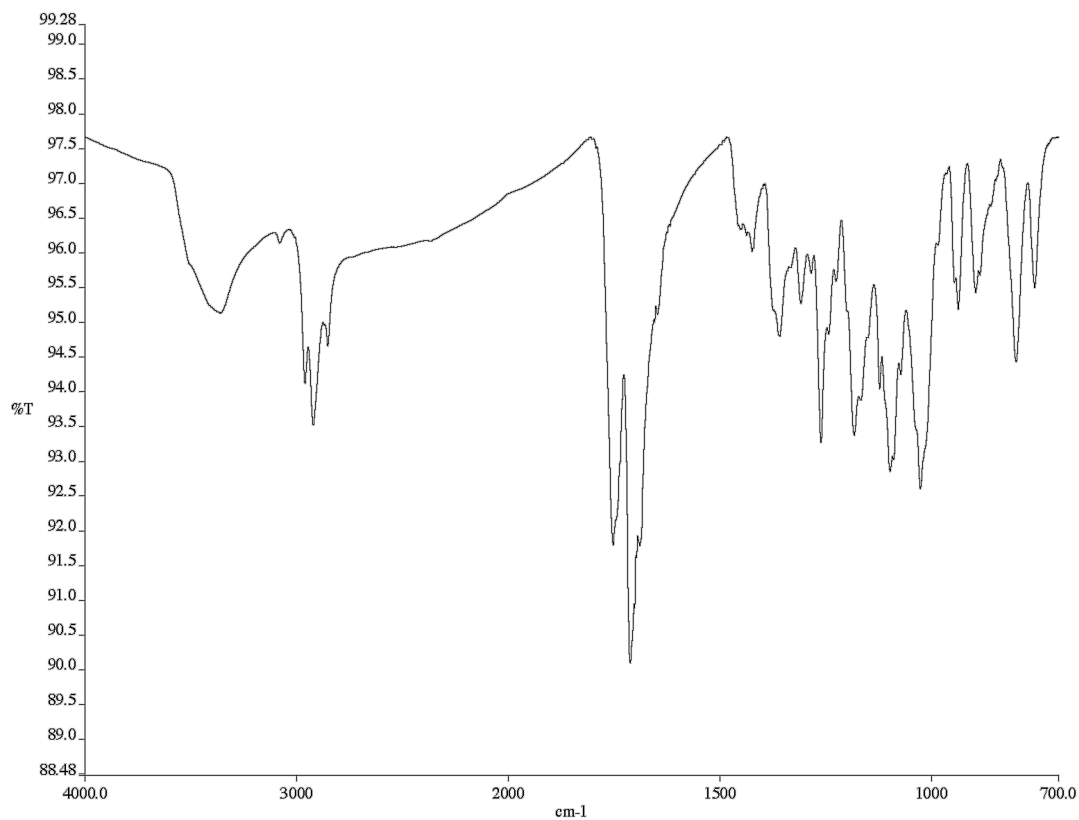

Infrared spectrum (Thin Film, NaCl) of compound **57/58**.

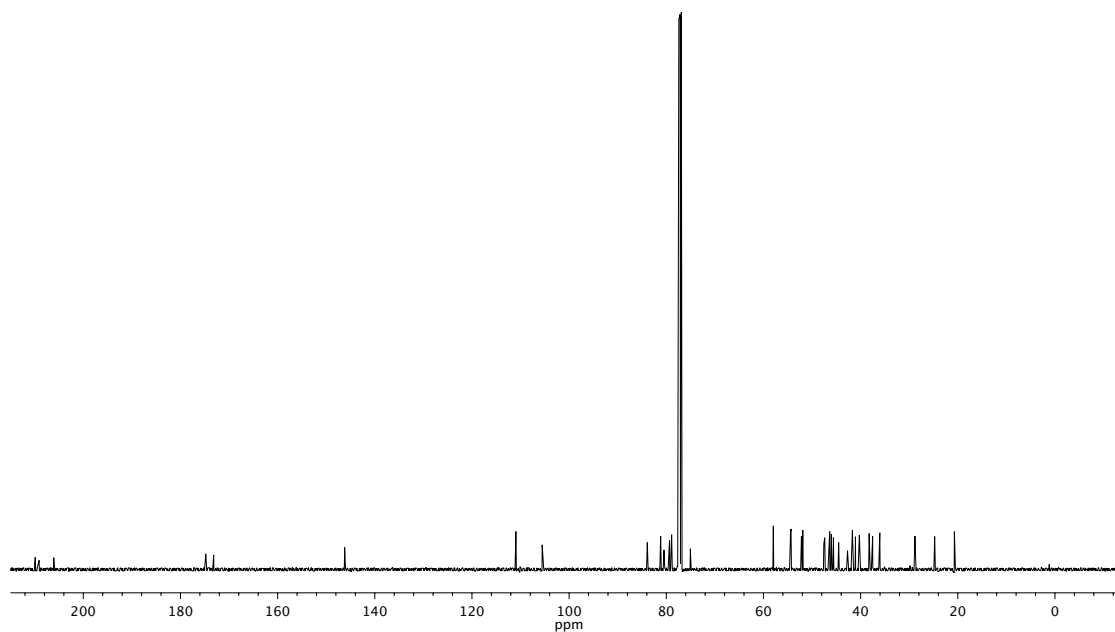

<sup>13</sup>C NMR (126 MHz, CDCl<sub>3</sub>) of compound **57/58**.

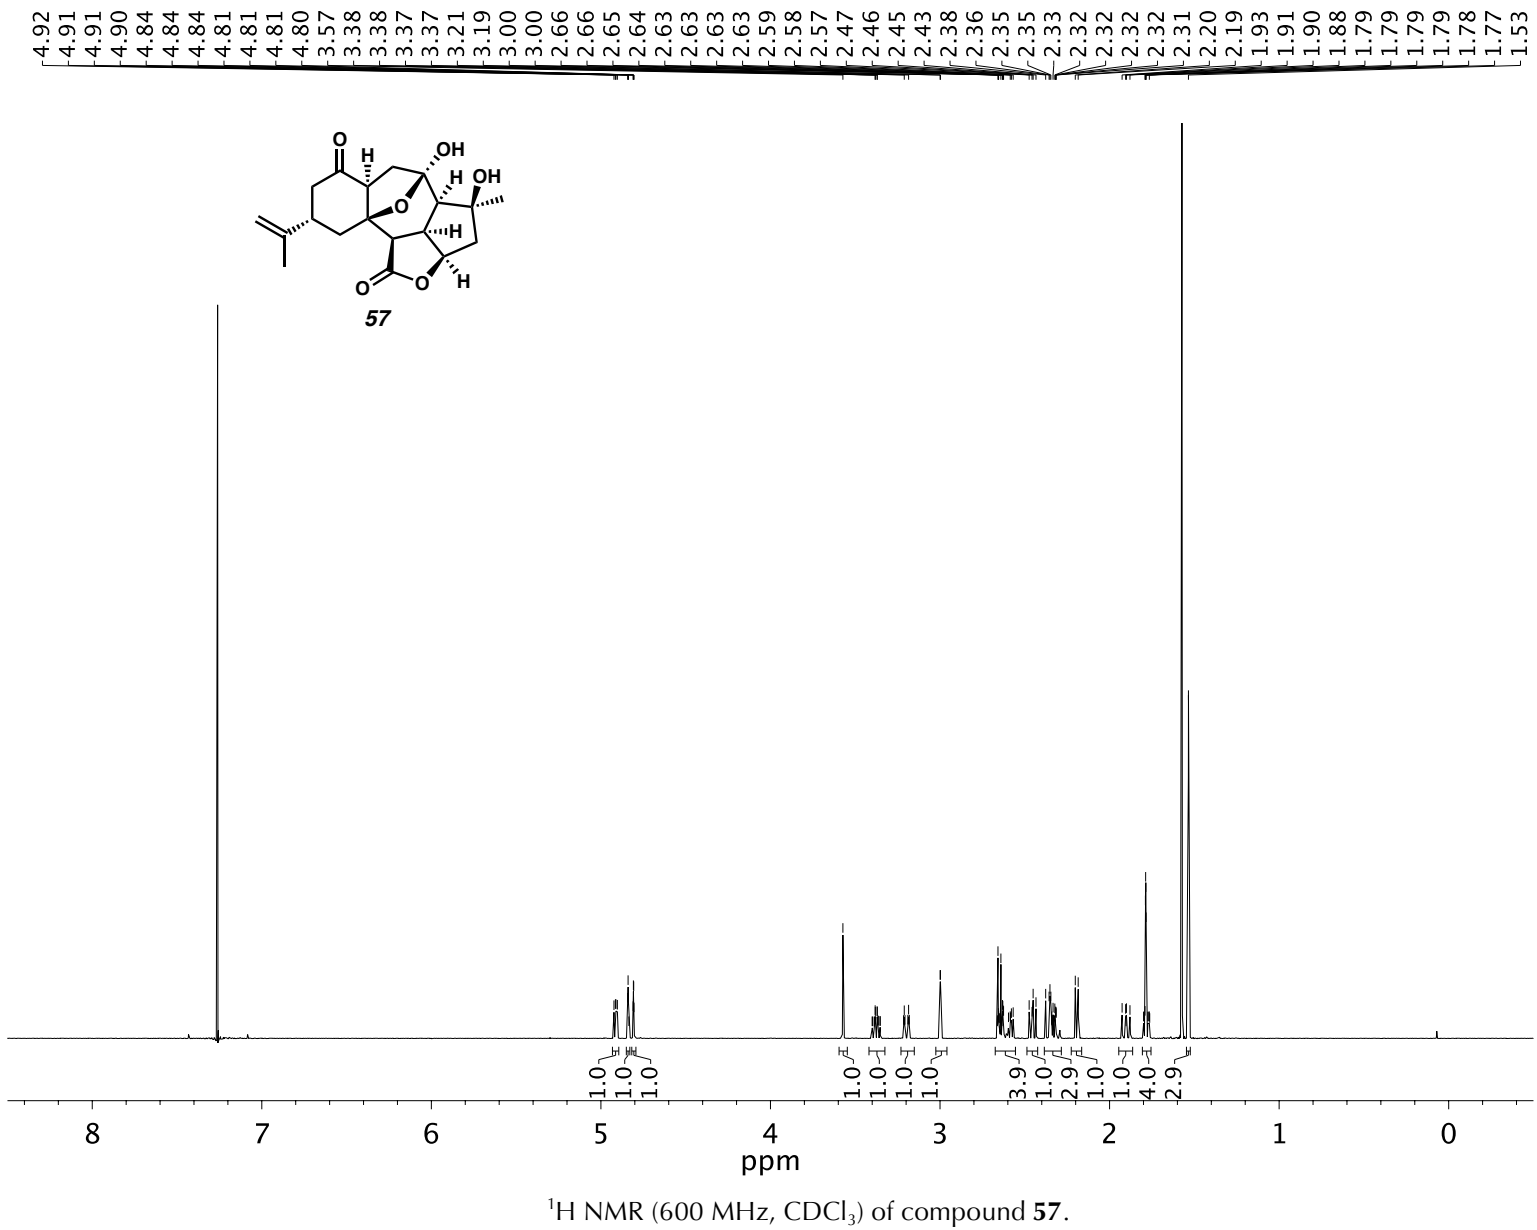

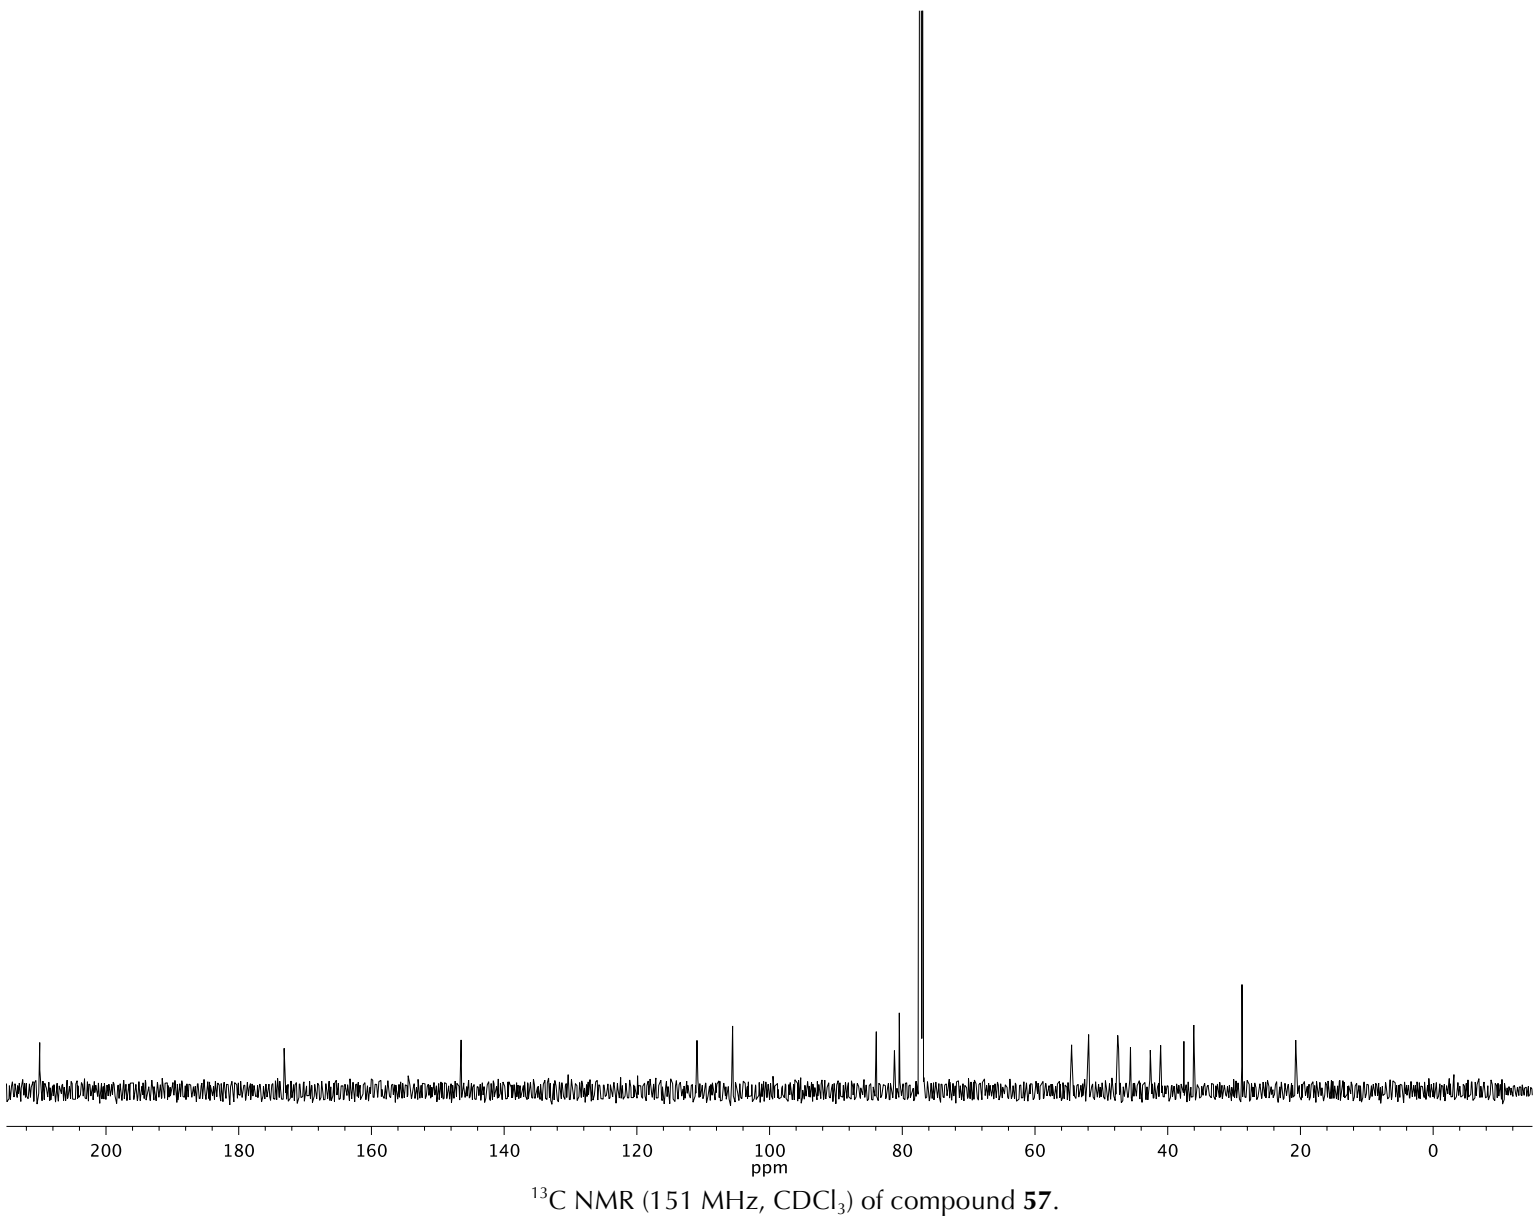



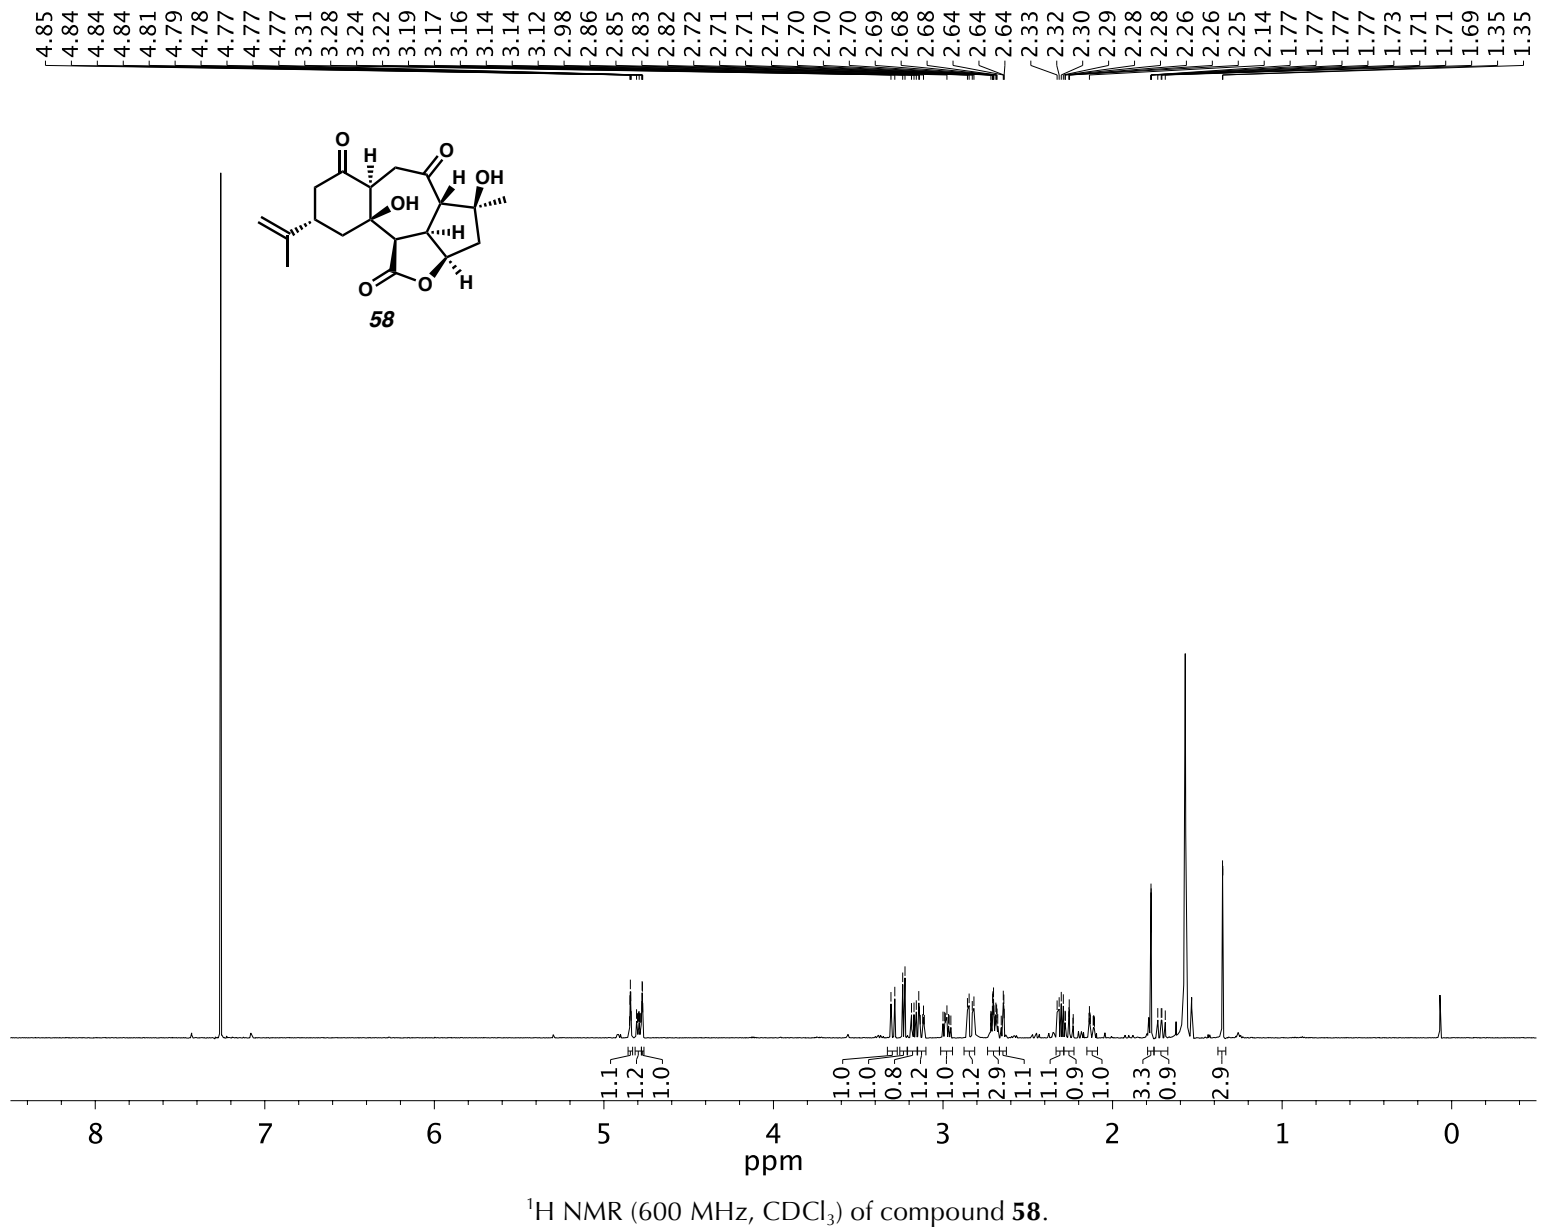

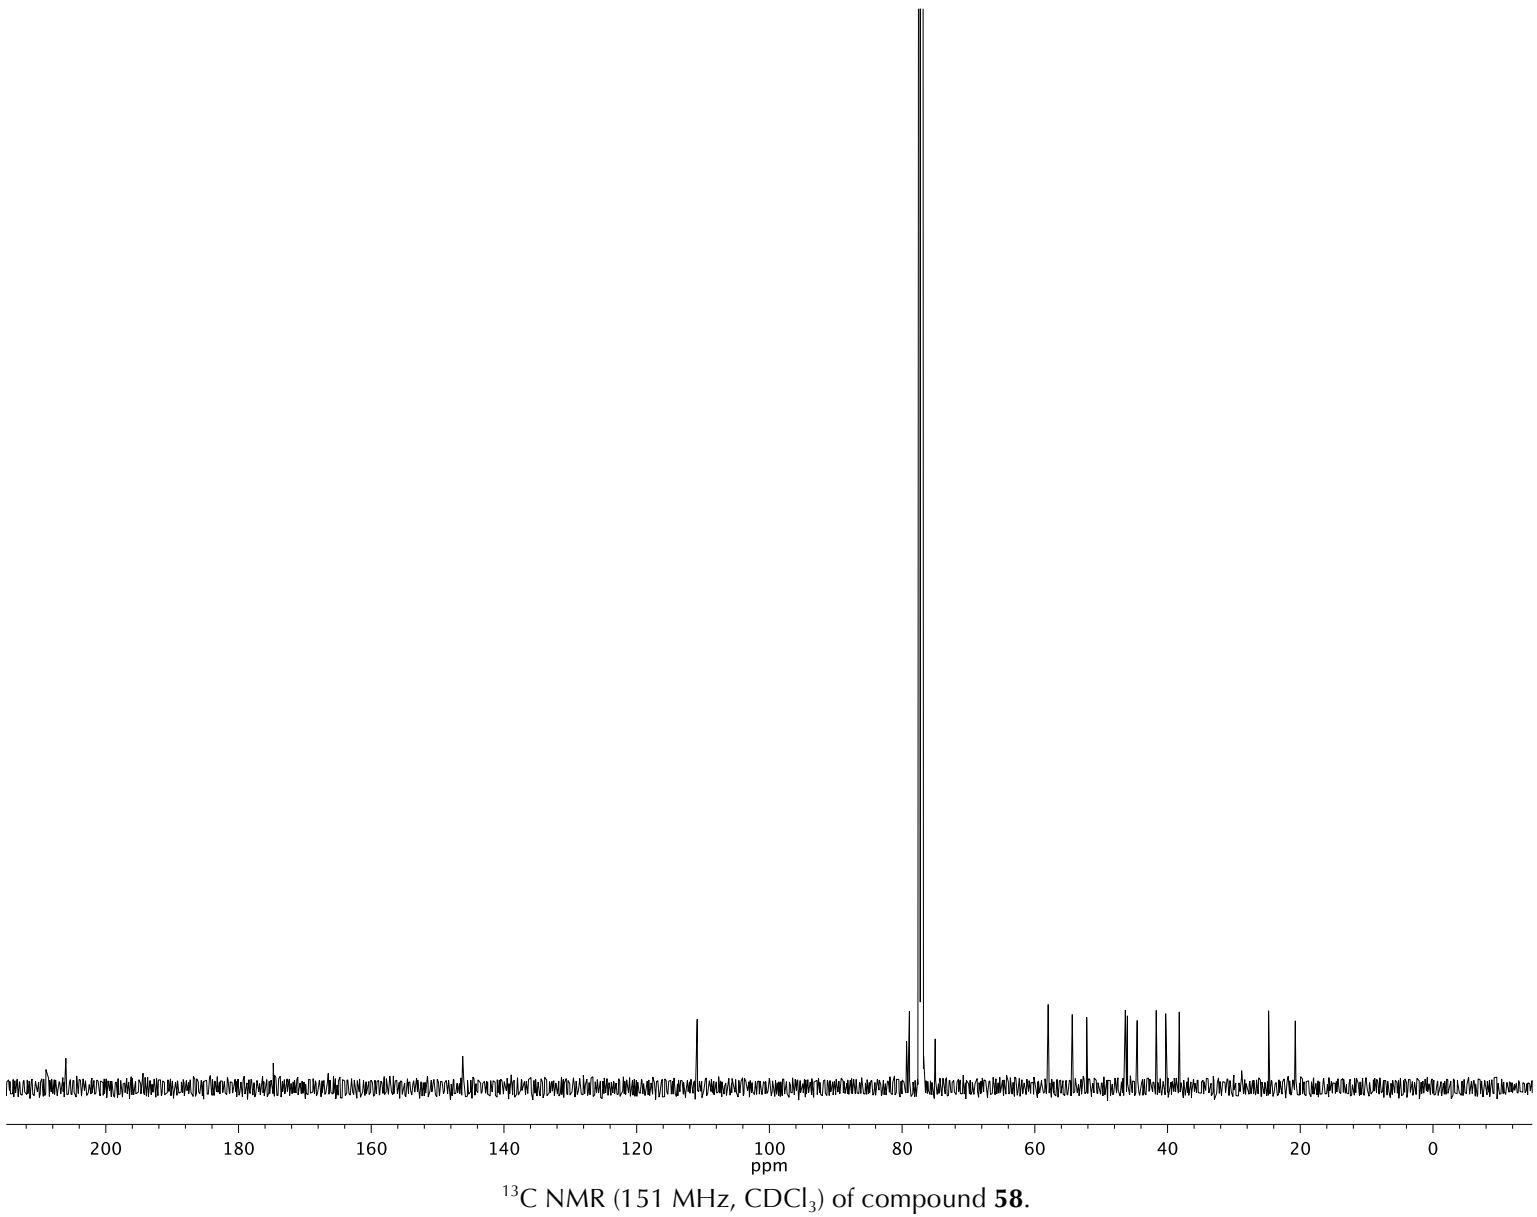

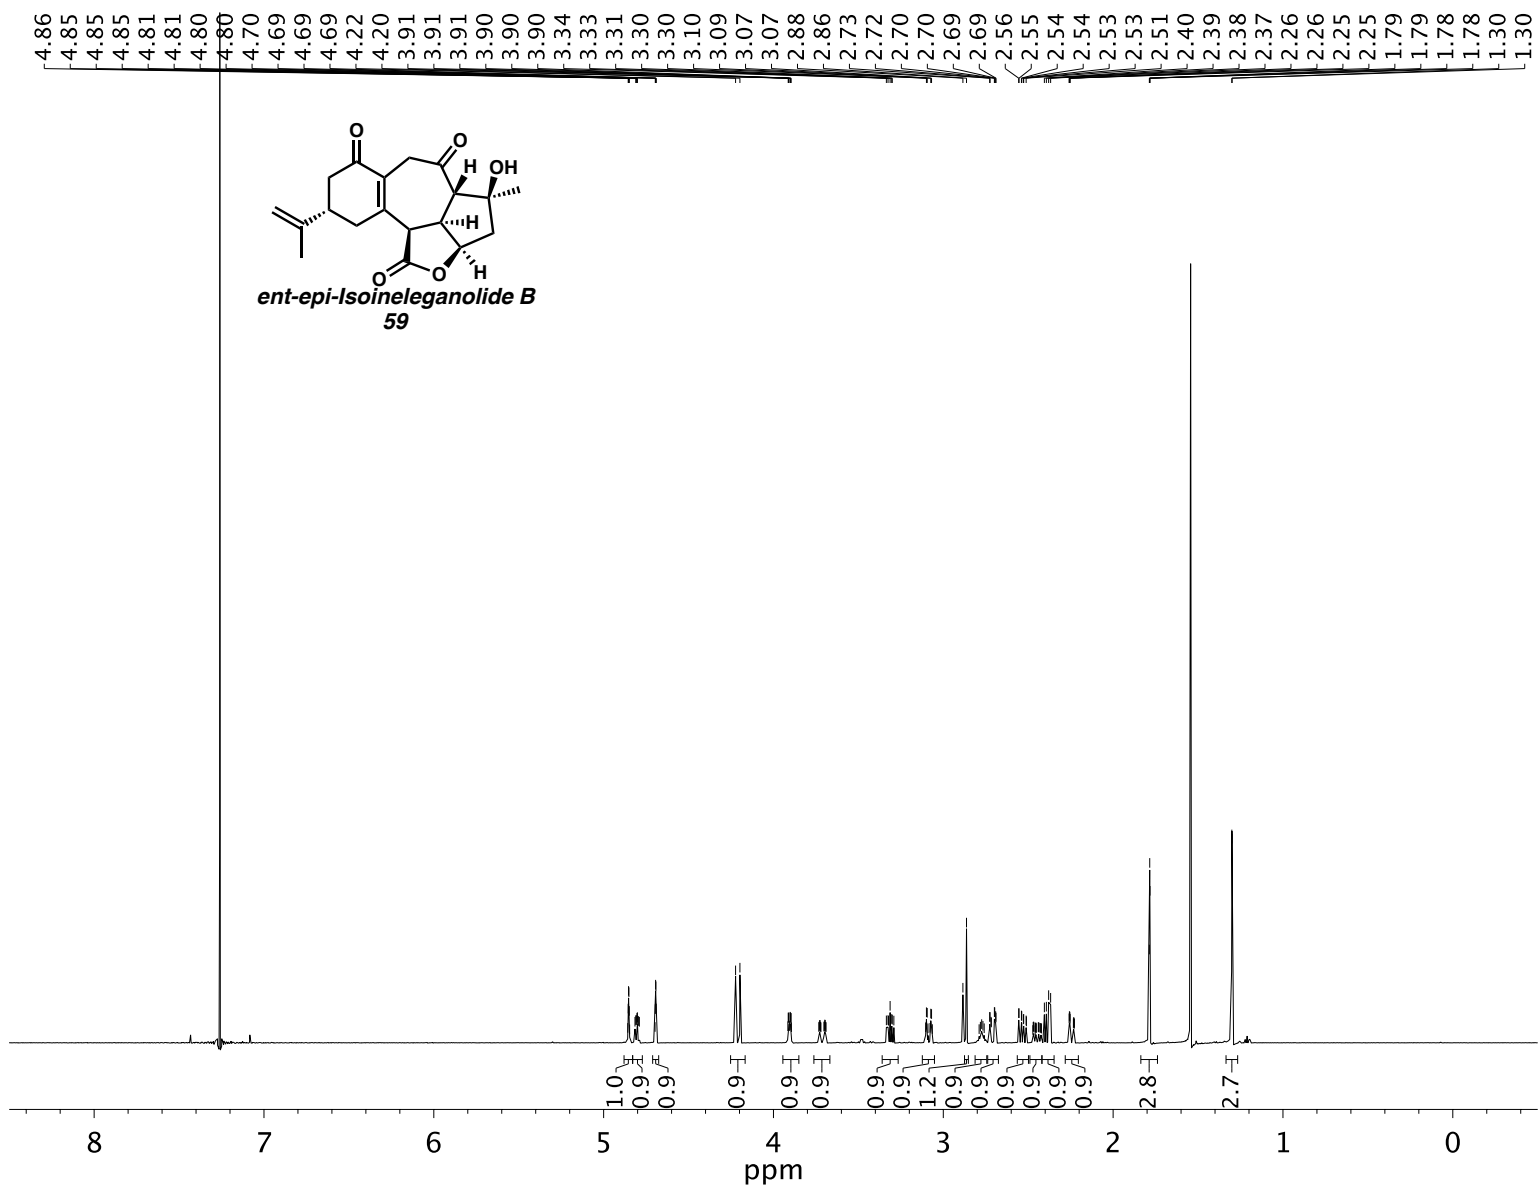

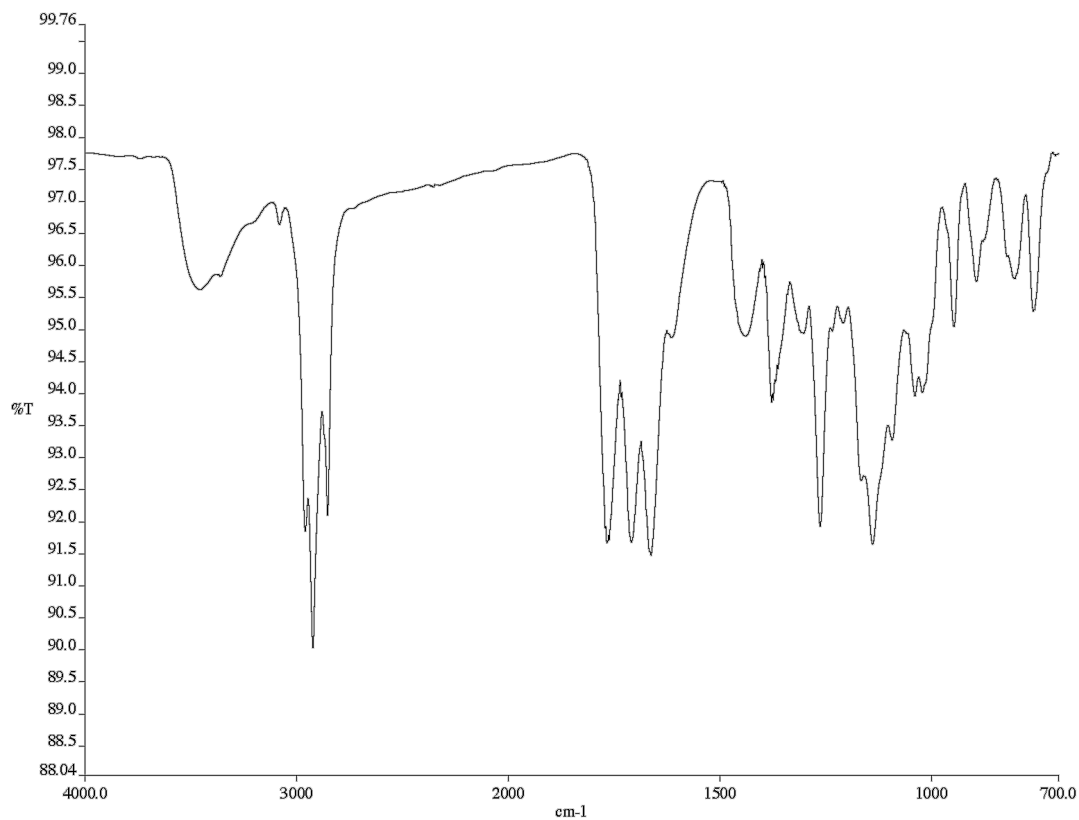

Infrared spectrum (Thin Film, NaCl) of compound **59**.

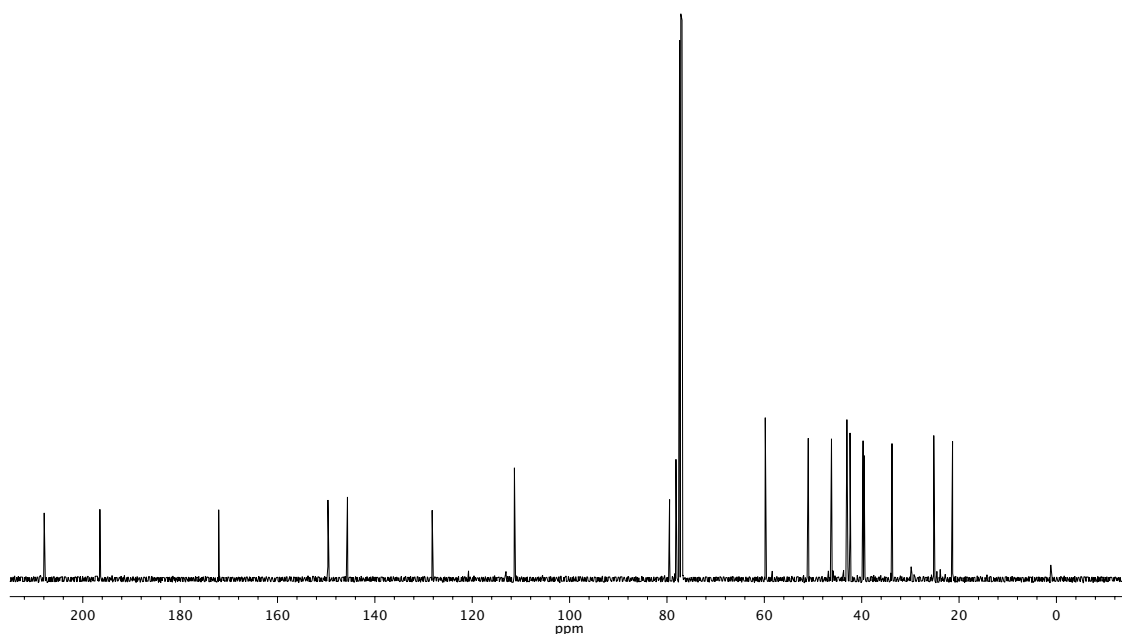

<sup>13</sup>C NMR (126 MHz, CDCl<sub>3</sub>) of compound **59**.

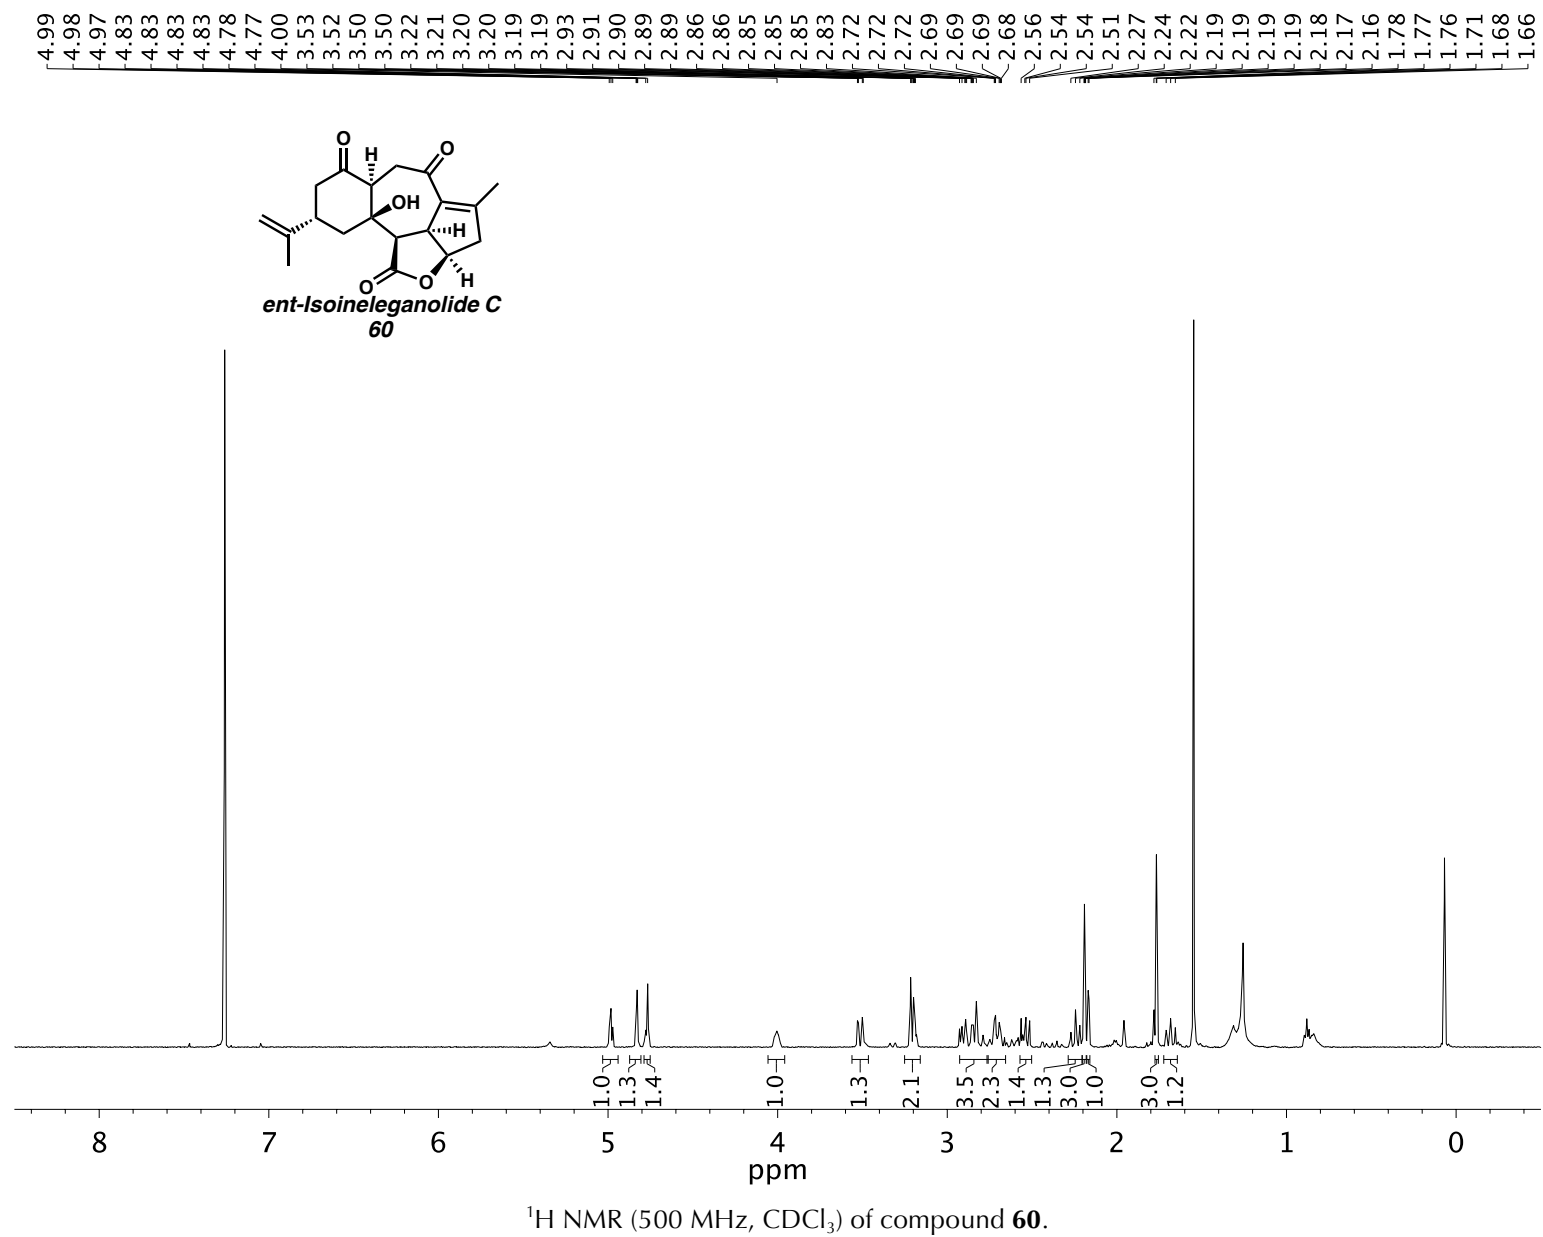

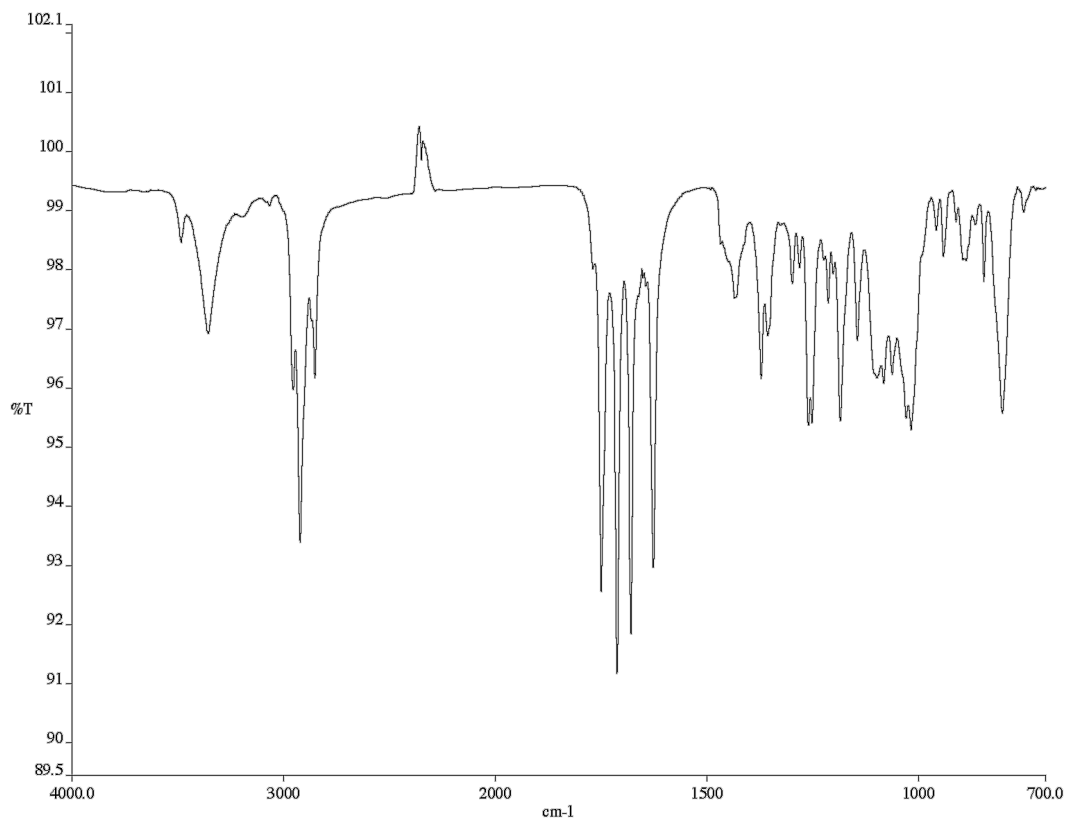

Infrared spectrum (Thin Film, NaCl) of compound **60**.

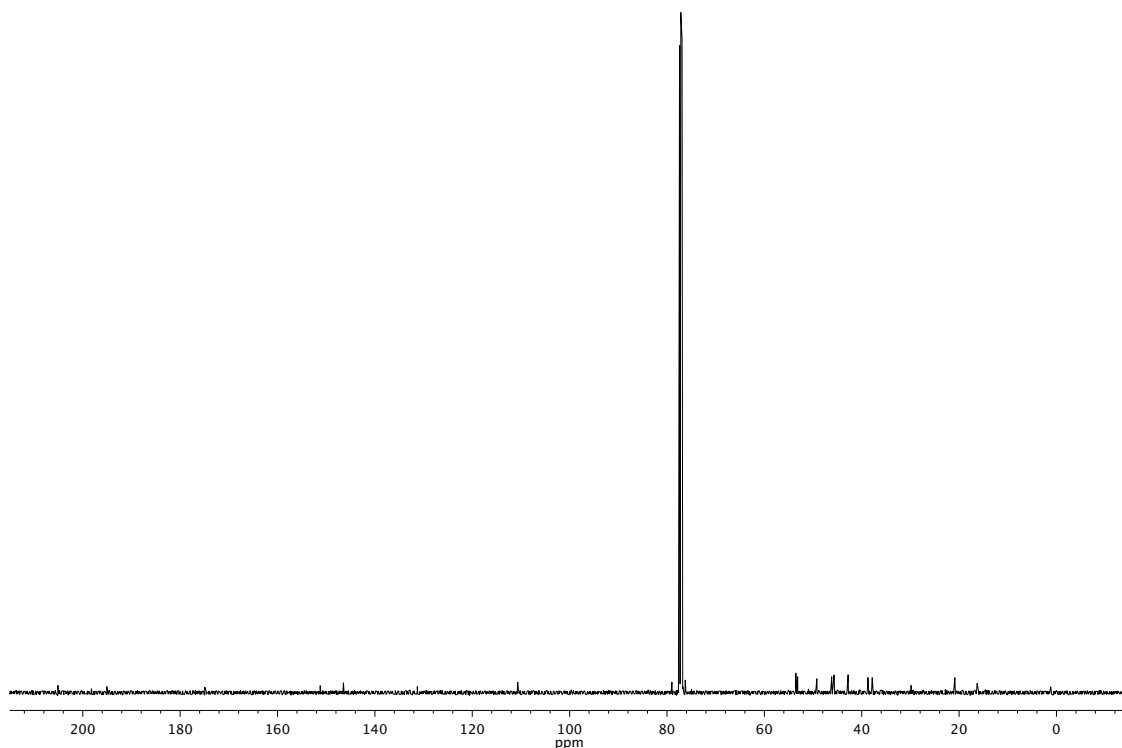

<sup>13</sup>C NMR (126 MHz, CDCl<sub>3</sub>) of compound **60**.

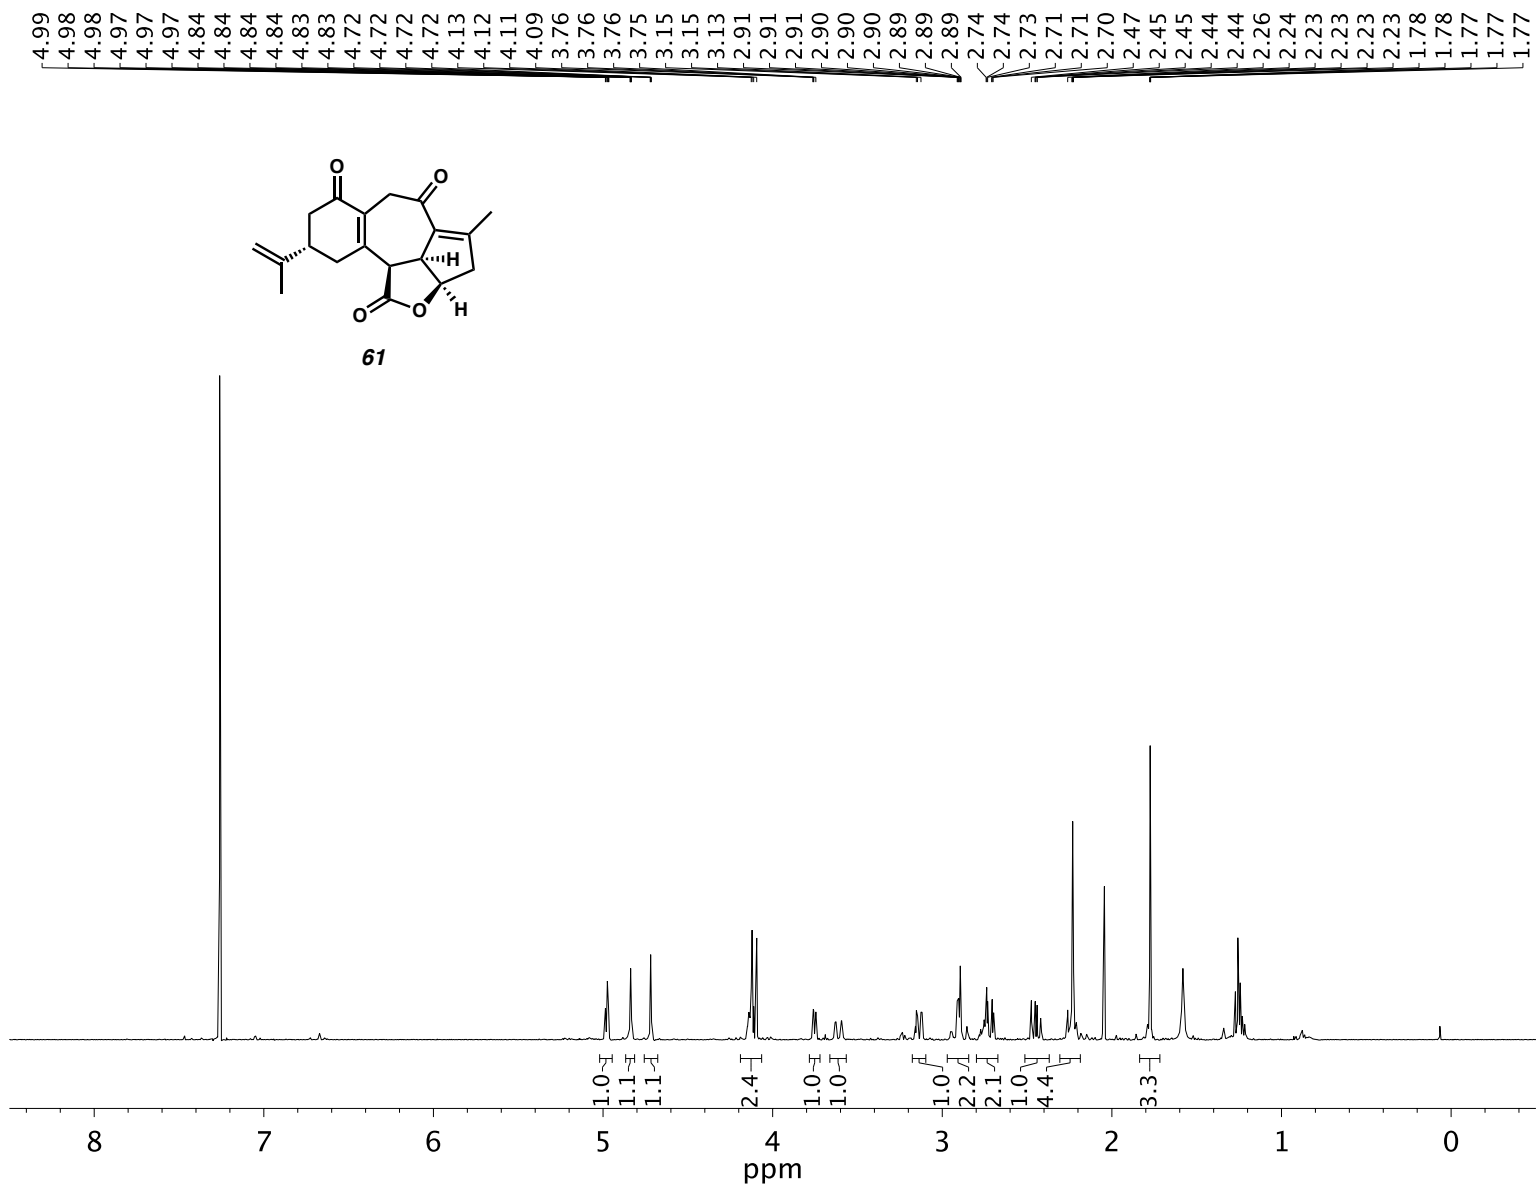

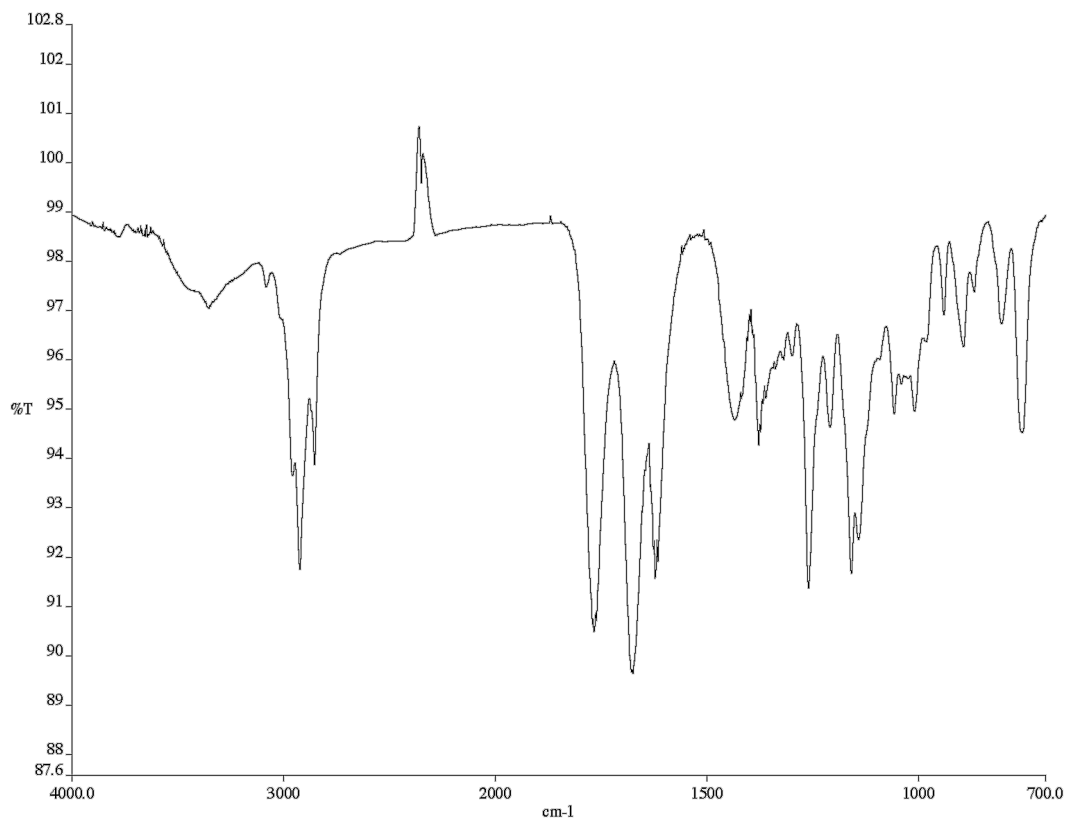

Infrared spectrum (Thin Film, NaCl) of compound **61**.

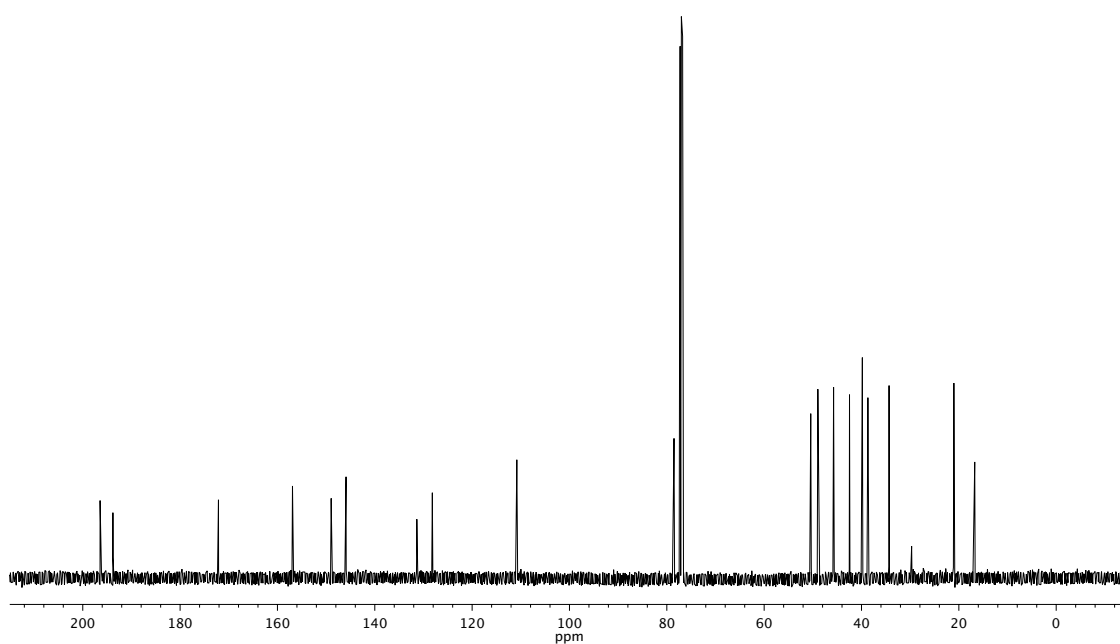

<sup>13</sup>C NMR (126 MHz, CDCl<sub>3</sub>) of compound **61**.
