# Supplementary material
Source: PubMed Central journal article supplement (PMC5889334)
Supplement: NIHMS945178-supplement-SI_X-Ray_Data.pdf [file NIHMS945178-supplement-SI_X-Ray_Data.pdf]

**The Development of a Unified Enantioselective, Convergent Synthetic Approach  
Toward the Furanobutenolide-Derived Polycyclic Norcembranoid Diterpenes:  
Asymmetric Formation of the Polycyclic Norditerpenoid Carbocyclic Core by  
Tandem Annulation Cascade**

Robert A. Craig, II, Russell C. Smith, Jennifer L. Roizen,  
Amanda C. Jones, Scott C. Virgil, and Brian M. Stoltz\*

*Warren and Katharine Schlinger Laboratory for Chemistry and Chemical Engineering,  
Division of Chemistry and Chemical Engineering, California Institute of Technology, MC  
101-20, Pasadena, CA 91125, U.S.A.*

**Table of Contents**

|                                                                                     |     |
|-------------------------------------------------------------------------------------|-----|
| 1. X-Ray Crystal Structure Analysis of Diene <b>34</b>                              | S2  |
| 2. X-Ray Crystal Structure Analysis of <i>ent</i> -Isoineleganolide A ( <b>36</b> ) | S5  |
| 3. X-Ray Crystal Structure Analysis of Bromide <b>54</b>                            | S8  |
| 4. X-Ray Crystal Structure Analysis of Ketopyran <b>55</b>                          | S11 |
| 5. X-Ray Crystal Structure Analysis of Hemiketal <b>57</b>                          | S14 |
| 6. X-Ray Crystal Structure Analysis of Enone <b>59</b>                              | S17 |
| 7. Notes & References                                                               | S20 |

## 1. X-Ray Crystal Structure Analysis of Diene **34**

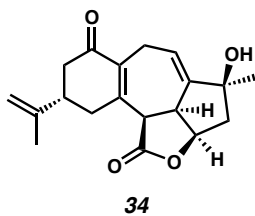

### Contents

Table S1.1. Experimental Details

Table S1.2. Crystal Data

Figure S1.1. X-Ray Crystal Structure of Diene **34** (ellipsoids represent 50% probability levels)

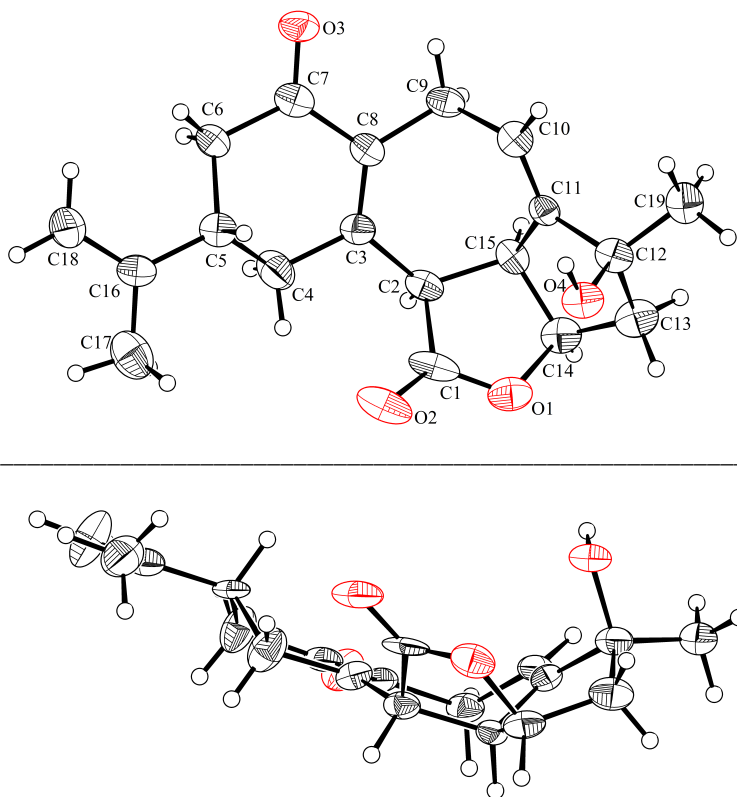

Table S1.1. Experimental Details for X-Ray Structure Determination of Diene **34**.

Low-temperature diffraction data ( $\phi$ - and  $\omega$ -scans) were collected on a Bruker AXS KAPPA APEX II diffractometer coupled to a APEX II CCD detector with graphite monochromated Mo  $K_{\alpha}$  radiation ( $\lambda = 0.71073 \text{ \AA}$ ) for the structure of diene **34**. The structure was solved by direct methods using SHELXS<sup>1</sup> and refined against  $F^2$  on all data by full-matrix least squares with SHELXL-2014<sup>2</sup> using established refinement techniques.<sup>3</sup> All non-hydrogen atoms were refined anisotropically. All hydrogen atoms were included into the model at geometrically calculated positions and refined using a riding model. The isotropic displacement parameters of all hydrogen atoms were fixed to 1.2 times the  $U$  value of the atoms they are linked to (1.5 times for methyl groups).

Diene **34** crystallizes in the monoclinic space group  $P2_1$  with one molecule in the asymmetric unit. The coordinates for the hydrogen atom bound to O4 was located in the difference Fourier synthesis and refined semi-freely with the help of a restraint on the O-H distance (0.84(4)  $\text{\AA}$ ). The crystal diffracted to 0.93  $\text{\AA}$  leading to low  $\theta$  precision. The structure is sufficient to determine the relative stereochemistry of the molecule.

Table S1.2. Crystal Data and Structure Refinement for Diene **34**.

|                                   |                                                |                  |
|-----------------------------------|------------------------------------------------|------------------|
| Caltech Identification code       | rac01                                          |                  |
| CCDC Deposition Number            | 1061010                                        |                  |
| Empirical formula                 | C <sub>19</sub> H <sub>22</sub> O <sub>4</sub> |                  |
| Formula weight                    | 314.36                                         |                  |
| Temperature                       | 100(2) K                                       |                  |
| Wavelength                        | 0.71073 Å                                      |                  |
| Crystal system                    | Monoclinic                                     |                  |
| Space group                       | P2 <sub>1</sub>                                |                  |
| Unit cell dimensions              | a = 11.7563(19) Å                              | α = 90°.         |
|                                   | b = 5.3917(8) Å                                | β = 104.529(8)°. |
|                                   | c = 12.861(2) Å                                | γ = 90°.         |
| Volume                            | 789.2(2) Å <sup>3</sup>                        |                  |
| Z                                 | 2                                              |                  |
| Density (calculated)              | 1.323 Mg/m <sup>3</sup>                        |                  |
| Absorption coefficient            | 0.092 mm <sup>-1</sup>                         |                  |
| F(000)                            | 336                                            |                  |
| Crystal size                      | 0.500 x 0.100 x 0.050 mm <sup>3</sup>          |                  |
| Theta range for data collection   | 1.636 to 22.464°.                              |                  |
| Index ranges                      | -12 ≤ h ≤ 11, -5 ≤ k ≤ 5, -13 ≤ l ≤ 13         |                  |
| Reflections collected             | 8970                                           |                  |
| Independent reflections           | 2037 [R(int) = 0.0848]                         |                  |
| Completeness to theta = 22.464°   | 100.0 %                                        |                  |
| Absorption correction             | Semi-empirical from equivalents                |                  |
| Refinement method                 | Full-matrix least-squares on F <sup>2</sup>    |                  |
| Data / restraints / parameters    | 2037 / 2 / 213                                 |                  |
| Goodness-of-fit on F <sup>2</sup> | 1.016                                          |                  |
| Final R indices [I > 2σ(I)]       | R1 = 0.0505, wR2 = 0.1037                      |                  |
| R indices (all data)              | R1 = 0.0898, wR2 = 0.1180                      |                  |
| Absolute structure parameter      | 0.4(10)                                        |                  |
| Extinction coefficient            | n/a                                            |                  |
| Largest diff. peak and hole       | 0.181 and -0.210 e.Å <sup>-3</sup>             |                  |

## 2. X-Ray Crystal Structure Analysis of *ent*-Isoineleganolide A (36)

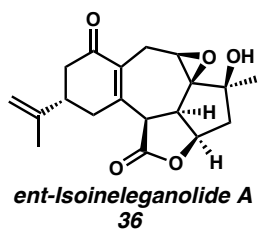

### Contents

Table S2.1. Experimental Details

Table S2.2. Crystal Data

Figure S2.1. X-Ray Crystal Structure of *ent*-Isoineleganolide A (36) (ellipsoids represent 50% probability levels)

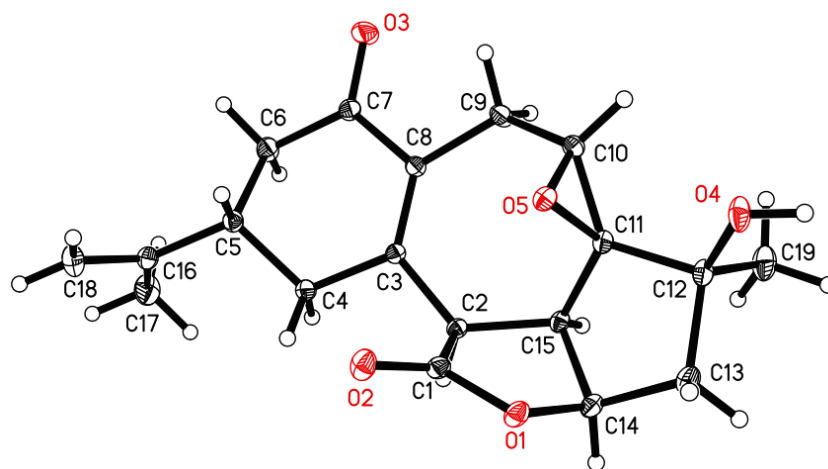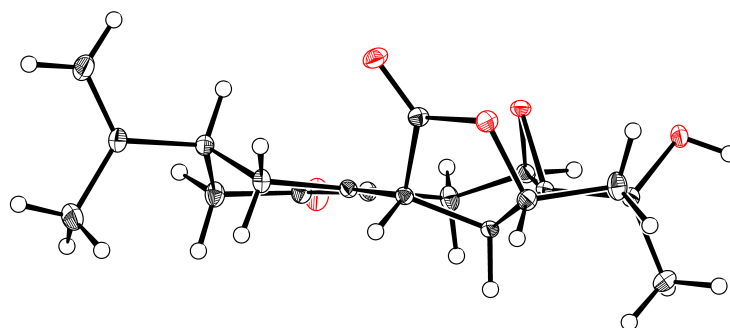

Table S2.1. Experimental Details for X-Ray Structure Determination of *ent*-Isoineleganolide A (**36**).

Low-temperature diffraction data ( $\phi$ - and  $\omega$ -scans) were collected on a Bruker AXS KAPPA APEX II diffractometer coupled to a APEX II CCD detector with graphite monochromated Mo  $K_\alpha$  radiation ( $\lambda = 0.71073 \text{ \AA}$ ) for the structure of *ent*-isoineleganolide A (**36**). The structure was solved by direct methods using SHELXS<sup>1</sup> and refined against  $F^2$  on all data by full-matrix least squares with SHELXL-2014<sup>2</sup> using established refinement techniques.<sup>3</sup> All non-hydrogen atoms were refined anisotropically. Unless otherwise noted, all hydrogen atoms were included into the model at geometrically calculated positions and refined using a riding model. The isotropic displacement parameters of all hydrogen atoms were fixed to 1.2 times the  $U$  value of the atoms they are linked to (1.5 times for methyl groups).

*ent*-Isoineleganolide A (**36**) crystallizes in the monoclinic space group  $P2_1$  with one molecule in the asymmetric unit. The coordinates for the hydrogen atom bound to O4 was located in the difference Fourier synthesis and refined semi-freely with the help of a restraint on the O-H distance (0.84(4)  $\text{\AA}$ ).

Table S2.2. Crystal Data and Structure Refinement for *ent*-Isoineleganolide A (**36**).

|                                   |                                                |                 |
|-----------------------------------|------------------------------------------------|-----------------|
| Caltech Identification code       | rac03                                          |                 |
| CCDC Deposition Number            | 853379 / 1061011                               |                 |
| Empirical formula                 | C <sub>19</sub> H <sub>22</sub> O <sub>5</sub> |                 |
| Formula weight                    | 330.36                                         |                 |
| Temperature                       | 100(2) K                                       |                 |
| Wavelength                        | 0.71073 Å                                      |                 |
| Crystal system                    | Monoclinic                                     |                 |
| Space group                       | P2 <sub>1</sub>                                |                 |
| Unit cell dimensions              | a = 6.9222(2) Å                                | α = 90°.        |
|                                   | b = 11.1470(4) Å                               | β = 94.070(2)°. |
|                                   | c = 10.4409(4) Å                               | γ = 90°.        |
| Volume                            | 803.61(5) Å <sup>3</sup>                       |                 |
| Z                                 | 2                                              |                 |
| Density (calculated)              | 1.365 Mg/m <sup>3</sup>                        |                 |
| Absorption coefficient            | 0.098 mm <sup>-1</sup>                         |                 |
| F(000)                            | 352                                            |                 |
| Crystal size                      | 0.500 x 0.450 x 0.200 mm <sup>3</sup>          |                 |
| Theta range for data collection   | 1.955 to 36.317°.                              |                 |
| Index ranges                      | -11 ≤ h ≤ 11, -18 ≤ k ≤ 18, -17 ≤ l ≤ 17       |                 |
| Reflections collected             | 30117                                          |                 |
| Independent reflections           | 7796 [R(int) = 0.0404]                         |                 |
| Completeness to theta = 25.242°   | 100.0 %                                        |                 |
| Absorption correction             | Semi-empirical from equivalents                |                 |
| Max. and min. transmission        | 0.7475 and 0.6239                              |                 |
| Refinement method                 | Full-matrix least-squares on F <sup>2</sup>    |                 |
| Data / restraints / parameters    | 7796 / 2 / 222                                 |                 |
| Goodness-of-fit on F <sup>2</sup> | 1.067                                          |                 |
| Final R indices [I > 2σ(I)]       | R1 = 0.0445, wR2 = 0.1109                      |                 |
| R indices (all data)              | R1 = 0.0538, wR2 = 0.1198                      |                 |
| Absolute structure parameter      | -0.5(3)                                        |                 |
| Extinction coefficient            | n/a                                            |                 |
| Largest diff. peak and hole       | 0.732 and -0.318 e.Å <sup>-3</sup>             |                 |

### 3. X-Ray Crystal Structure Analysis of Bromide **54**

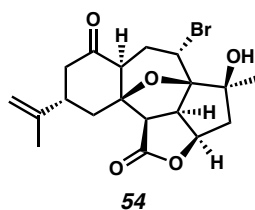

#### Contents

Table S3.1. Experimental Details

Table S3.2. Crystal Data

Figure S3.1. X-Ray Crystal Structure of Bromide **54** (ellipsoids represent 50% probability levels)

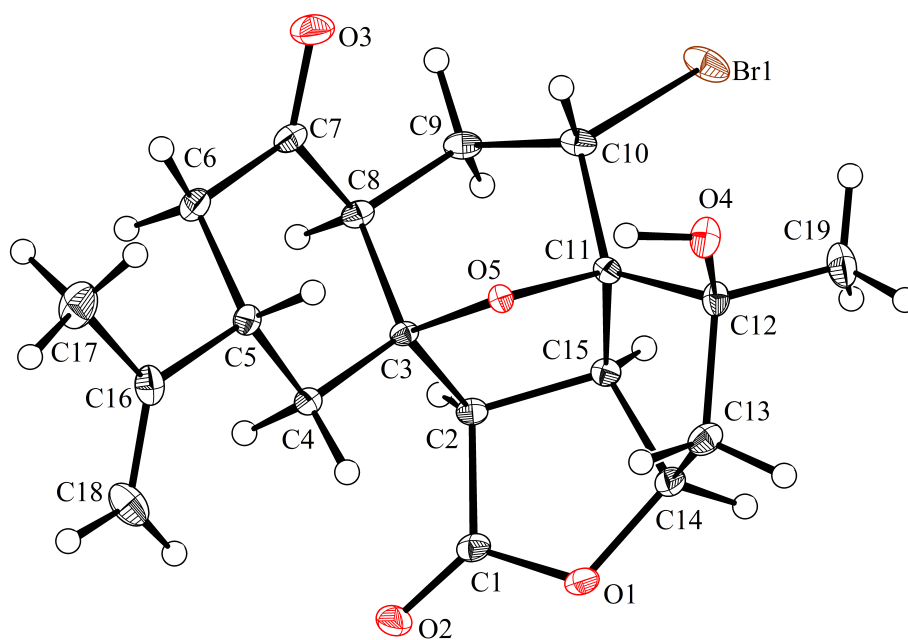



Table S3.1. Experimental Details for X-Ray Structure Determination of Bromide **54**.

Low-temperature diffraction data ( $\phi$ - and  $\omega$ -scans) were collected on a Bruker AXS KAPPA APEX II diffractometer coupled to a APEX II CCD detector with graphite monochromated Mo  $K_\alpha$  radiation ( $\lambda = 0.71073 \text{ \AA}$ ) for the structure of bromide **54**. The structure was solved by direct methods using SHELXS<sup>1</sup> and refined against  $F^2$  on all data by full-matrix least squares with SHELXL-2014<sup>2</sup> using established refinement techniques.<sup>3</sup> All non-hydrogen atoms were refined anisotropically. Unless otherwise noted, all hydrogen atoms were included into the model at geometrically calculated positions and refined using a riding model. The isotropic displacement parameters of all hydrogen atoms were fixed to 1.2 times the  $U$  value of the atoms they are linked to (1.5 times for methyl groups).

Bromide **54** crystallizes in the orthorhombic space group  $P2_12_12_1$  with one molecule in the asymmetric unit. The coordinates for the hydrogen atom bound to O4 was located in the difference Fourier synthesis and refined semi-freely with the help of a restraint on the O-H distance (0.84(4)  $\text{\AA}$ ).

Table S3.2. Crystal Data and Structure Refinement for Bromide **54**.

|                                   |                                                  |          |
|-----------------------------------|--------------------------------------------------|----------|
| Caltech Identification code       | rac10                                            |          |
| CCDC Deposition Number            | 1061013                                          |          |
| Empirical formula                 | C <sub>19</sub> H <sub>23</sub> BrO <sub>5</sub> |          |
| Formula weight                    | 411.28                                           |          |
| Temperature                       | 100(2) K                                         |          |
| Wavelength                        | 0.71073 Å                                        |          |
| Crystal system                    | Orthorhombic                                     |          |
| Space group                       | P2 <sub>1</sub> 2 <sub>1</sub> 2 <sub>1</sub>    |          |
| Unit cell dimensions              | a = 7.6137(4) Å                                  | α = 90°. |
|                                   | b = 9.3584(5) Å                                  | β = 90°. |
|                                   | c = 24.1592(13) Å                                | γ = 90°. |
| Volume                            | 1721.39(16) Å <sup>3</sup>                       |          |
| Z                                 | 4                                                |          |
| Density (calculated)              | 1.587 Mg/m <sup>3</sup>                          |          |
| Absorption coefficient            | 2.416 mm <sup>-1</sup>                           |          |
| F(000)                            | 848                                              |          |
| Crystal size                      | 0.500 x 0.450 x 0.100 mm <sup>3</sup>            |          |
| Theta range for data collection   | 2.334 to 36.318°.                                |          |
| Index ranges                      | -12 ≤ h ≤ 12, -15 ≤ k ≤ 14, -39 ≤ l ≤ 40         |          |
| Reflections collected             | 51998                                            |          |
| Independent reflections           | 8272 [R(int) = 0.0380]                           |          |
| Completeness to theta = 25.242°   | 99.9 %                                           |          |
| Absorption correction             | Semi-empirical from equivalents                  |          |
| Max. and min. transmission        | 0.7478 and 0.5973                                |          |
| Refinement method                 | Full-matrix least-squares on F <sup>2</sup>      |          |
| Data / restraints / parameters    | 8272 / 1 / 231                                   |          |
| Goodness-of-fit on F <sup>2</sup> | 1.035                                            |          |
| Final R indices [I > 2σ(I)]       | R1 = 0.0251, wR2 = 0.0613                        |          |
| R indices (all data)              | R1 = 0.0297, wR2 = 0.0625                        |          |
| Absolute structure parameter      | 0.014(2)                                         |          |
| Extinction coefficient            | n/a                                              |          |
| Largest diff. peak and hole       | 0.746 and -0.367 e.Å <sup>-3</sup>               |          |

#### 4. X-Ray Crystal Structure Analysis of Ketopyran **55**

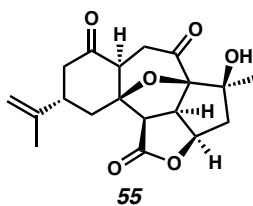

##### Contents

Table S4.1. Experimental Details

Table S4.2. Crystal Data

Figure S4.1. X-Ray Crystal Structure of Ketopyran **55** (ellipsoids represent 50% probability levels)

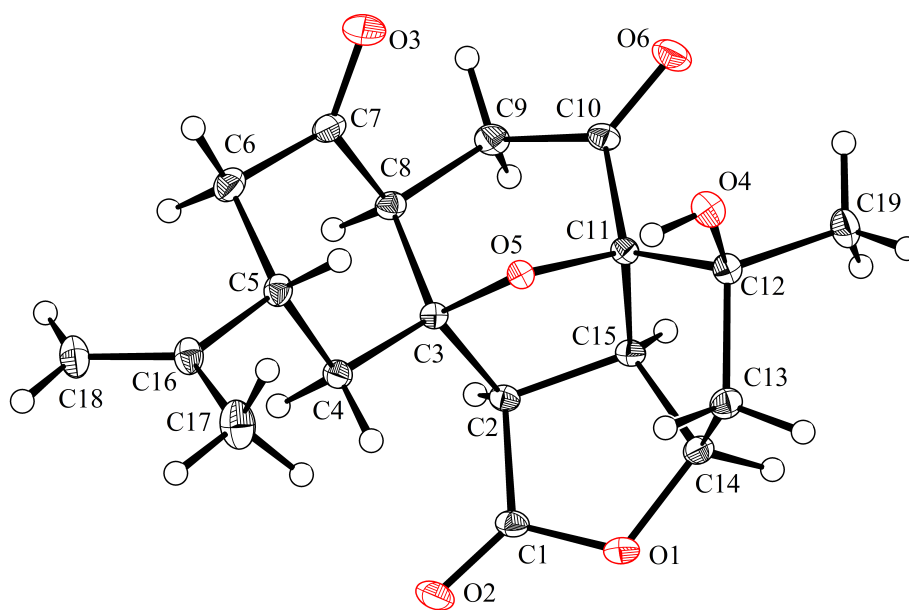

Table S4.1. Experimental Details for X-Ray Structure Determination of Ketopyran **55**.

Low-temperature diffraction data ( $\phi$ - and  $\omega$ -scans) were collected on a Bruker AXS KAPPA APEX II diffractometer coupled to a APEX II CCD detector with graphite monochromated Mo  $K_\alpha$  radiation ( $\lambda = 0.71073 \text{ \AA}$ ) for the structure of ketopyran **55**. The structure was solved by direct methods using SHELXS<sup>1</sup> and refined against  $F^2$  on all data by full-matrix least squares with SHELXL-2014<sup>2</sup> using established refinement techniques.<sup>3</sup> All non-hydrogen atoms were refined anisotropically. Unless otherwise noted, all hydrogen atoms were included into the model at geometrically calculated positions and refined using a riding model. The isotropic displacement parameters of all hydrogen atoms were fixed to 1.2 times the  $U$  value of the atoms they are linked to (1.5 times for methyl groups).

Ketopyran **55** crystallizes in the orthorhombic space group  $P2_12_12_1$  with one molecule in the asymmetric unit. The coordinates for the hydrogen atom bound to O4 was located in the difference Fourier synthesis and refined semi-freely with the help of a restraint on the O-H distance (0.84(4)  $\text{\AA}$ ). The chirality of the molecule cannot be reliably determined from the diffraction data. The molecule could be the wrong enantiomer or a mixture of both enantiomers.

Table S4.2. Crystal Data and Structure Refinement for Ketopyran **55**.

|                                   |                                                |          |
|-----------------------------------|------------------------------------------------|----------|
| Caltech Identification code       | rac06                                          |          |
| CCDC Deposition Number            | 1061012                                        |          |
| Empirical formula                 | C <sub>19</sub> H <sub>22</sub> O <sub>6</sub> |          |
| Formula weight                    | 346.36                                         |          |
| Temperature                       | 100(2) K                                       |          |
| Wavelength                        | 0.71073 Å                                      |          |
| Crystal system                    | Orthorhombic                                   |          |
| Space group                       | P2 <sub>1</sub> 2 <sub>1</sub> 2 <sub>1</sub>  |          |
| Unit cell dimensions              | a = 8.2576(3) Å                                | α = 90°. |
|                                   | b = 10.4049(4) Å                               | β = 90°. |
|                                   | c = 19.0995(8) Å                               | γ = 90°. |
| Volume                            | 1641.02(11) Å <sup>3</sup>                     |          |
| Z                                 | 4                                              |          |
| Density (calculated)              | 1.402 Mg/m <sup>3</sup>                        |          |
| Absorption coefficient            | 0.104 mm <sup>-1</sup>                         |          |
| F(000)                            | 736                                            |          |
| Crystal size                      | 0.450 x 0.350 x 0.100 mm <sup>3</sup>          |          |
| Theta range for data collection   | 2.133 to 43.738°.                              |          |
| Index ranges                      | -16 ≤ h ≤ 14, -20 ≤ k ≤ 18, -37 ≤ l ≤ 37       |          |
| Reflections collected             | 85501                                          |          |
| Independent reflections           | 12633 [R(int) = 0.0489]                        |          |
| Completeness to theta = 25.242°   | 100.0 %                                        |          |
| Absorption correction             | Semi-empirical from equivalents                |          |
| Max. and min. transmission        | 0.7487 and 0.7039                              |          |
| Refinement method                 | Full-matrix least-squares on F <sup>2</sup>    |          |
| Data / restraints / parameters    | 12633 / 1 / 231                                |          |
| Goodness-of-fit on F <sup>2</sup> | 1.060                                          |          |
| Final R indices [I > 2σ(I)]       | R1 = 0.0442, wR2 = 0.1107                      |          |
| R indices (all data)              | R1 = 0.0613, wR2 = 0.1176                      |          |
| Absolute structure parameter      | 0.35(16)                                       |          |
| Extinction coefficient            | n/a                                            |          |
| Largest diff. peak and hole       | 0.468 and -0.291 e.Å <sup>-3</sup>             |          |

## 5. X-Ray Crystal Structure Analysis of Hemiketal **57**

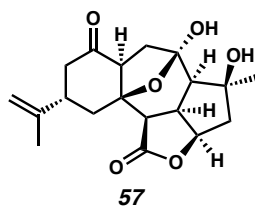

### Contents

Table S5.1. Experimental Details

Table S5.2. Crystal Data

Figure S5.1. X-Ray Crystal Structure of Hemiketal **57** (ellipsoids represent 50% probability levels)

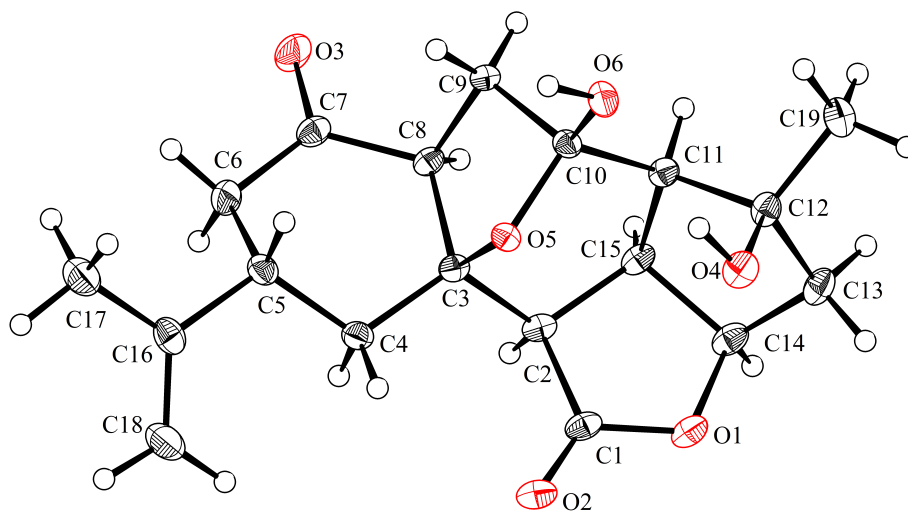

Table S5.1. Experimental Details for X-Ray Structure Determination of Hemiketal **57**.

Low-temperature diffraction data ( $\phi$ - and  $\omega$ -scans) were collected on a Bruker AXS KAPPA APEX II diffractometer coupled to a APEX II CCD detector with graphite monochromated Mo  $K_\alpha$  radiation ( $\lambda = 0.71073 \text{ \AA}$ ) for the structure of hemiketal **57** and on a Bruker AXS D8 VENTURE KAPPA diffractometer coupled to a PHOTON 100 CMOS detector with Cu  $K_\alpha$  radiation ( $\lambda = 1.54178 \text{ \AA}$ ) from an I $\mu$ S micro-source for the structure of compound P15149 and P15156. The structure was solved by direct methods using SHELXS<sup>1</sup> and refined against  $F^2$  on all data by full-matrix least squares with SHELXL-2014<sup>2</sup> using established refinement techniques.<sup>3</sup> All non-hydrogen atoms were refined anisotropically. Unless otherwise noted, all hydrogen atoms were included into the model at geometrically calculated positions and refined using a riding model. The isotropic displacement parameters of all hydrogen atoms were fixed to 1.2 times the  $U$  value of the atoms they are linked to (1.5 times for methyl groups).

Hemiketal **57** crystallizes in the orthorhombic space group  $P2_12_12_1$  with one molecule in the asymmetric unit. The coordinates for all hydrogen atoms were located in the difference Fourier synthesis and refined freely.

Table S5.2. Crystal Data and Structure Refinement for Hemiketal **57**.

|                                   |                                                |         |
|-----------------------------------|------------------------------------------------|---------|
| Caltech Identification code       | p15156cu                                       |         |
| CCDC Deposition Number            | 1061009                                        |         |
| Empirical formula                 | C <sub>19</sub> H <sub>24</sub> O <sub>6</sub> |         |
| Formula weight                    | 348.38                                         |         |
| Temperature                       | 100 K                                          |         |
| Wavelength                        | 1.54178 Å                                      |         |
| Crystal system                    | Orthorhombic                                   |         |
| Space group                       | P2 <sub>1</sub> 2 <sub>1</sub> 2 <sub>1</sub>  |         |
| Unit cell dimensions              | a = 8.2463(2) Å                                | α = 90° |
|                                   | b = 10.3683(3) Å                               | β = 90° |
|                                   | c = 19.3151(5) Å                               | γ = 90° |
| Volume                            | 1651.44(8) Å <sup>3</sup>                      |         |
| Z                                 | 4                                              |         |
| Density (calculated)              | 1.401 Mg/m <sup>3</sup>                        |         |
| Absorption coefficient            | 0.859 mm <sup>-1</sup>                         |         |
| F(000)                            | 744                                            |         |
| Crystal size                      | 0.16 x 0.09 x 0.08 mm <sup>3</sup>             |         |
| Theta range for data collection   | 4.578 to 79.097°.                              |         |
| Index ranges                      | -10 ≤ h ≤ 10, -13 ≤ k ≤ 13, -24 ≤ l ≤ 24       |         |
| Reflections collected             | 40519                                          |         |
| Independent reflections           | 3557 [R(int) = 0.0399]                         |         |
| Completeness to theta = 67.000°   | 100.0 %                                        |         |
| Absorption correction             | Semi-empirical from equivalents                |         |
| Max. and min. transmission        | 1.0000 and 0.8788                              |         |
| Refinement method                 | Full-matrix least-squares on F <sup>2</sup>    |         |
| Data / restraints / parameters    | 3557 / 0 / 322                                 |         |
| Goodness-of-fit on F <sup>2</sup> | 1.070                                          |         |
| Final R indices [I > 2σ(I)]       | R1 = 0.0252, wR2 = 0.0607                      |         |
| R indices (all data)              | R1 = 0.0268, wR2 = 0.0619                      |         |
| Absolute structure parameter      | 0.03(4)                                        |         |
| Extinction coefficient            | n/a                                            |         |
| Largest diff. peak and hole       | 0.170 and -0.183 e.Å <sup>-3</sup>             |         |



**6. X-Ray Crystal Structure Analysis of Enone 59**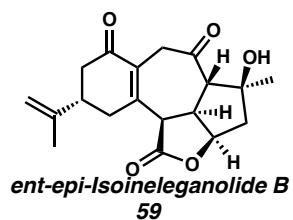Contents

Table S6.1. Experimental Details

Table S6.2. Crystal Data

Figure S6.1. X-Ray Crystal Structure of Enone **59** (ellipsoids represent 50% probability levels)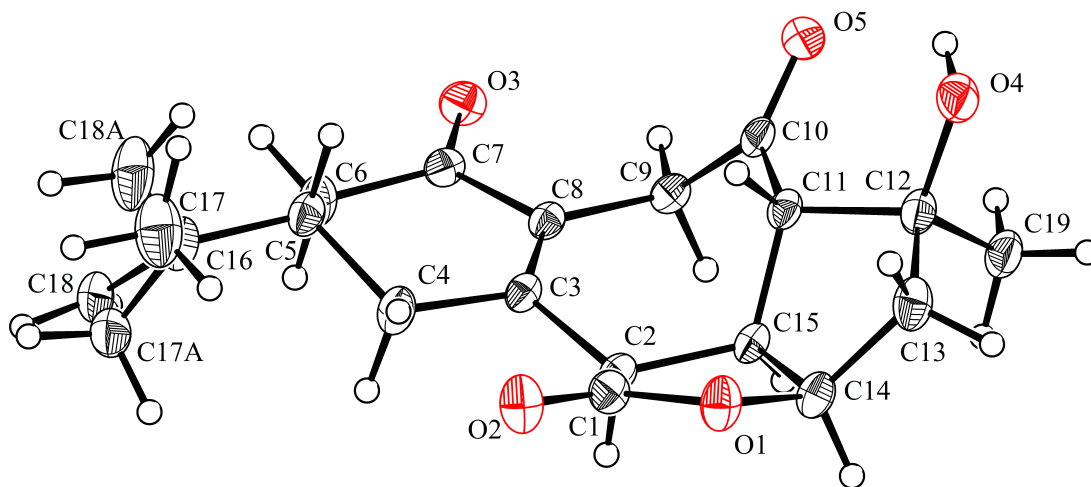

Table S6.1. Experimental Details for X-Ray Structure Determination of Enone **59**.

Low-temperature diffraction data ( $\phi$ - and  $\omega$ -scans) were collected on a Bruker AXS D8 VENTURE KAPPA diffractometer coupled to a PHOTON 100 CMOS detector with Cu  $K\alpha$  radiation ( $\lambda = 1.54178 \text{ \AA}$ ) from an  $I\mu\text{S}$  micro-source for the structure of *ent-epi*-Isoineleganolide B (**59**). The structure was solved by direct methods using SHELXS<sup>1</sup> and refined against  $F^2$  on all data by full-matrix least squares with SHELXL-2014<sup>2</sup> using established refinement techniques.<sup>3</sup> All non-hydrogen atoms were refined anisotropically. All hydrogen atoms were included into the model at geometrically calculated positions and refined using a riding model. The isotropic displacement parameters of all hydrogen atoms were fixed to 1.2 times the  $U$  value of the atoms they are linked to (1.5 times for methyl groups).

*ent-epi*-Isoineleganolide B (**59**) crystallizes in the monoclinic space group  $C2$  with one molecule in the asymmetric unit. The isopropenyl group was disordered in the crystal (51.5:48.5) and the corresponding positions were labeled C17-C18 and C17A-C18A, respectively.

Table S6.2. Crystal Data and Structure Refinement for Enone **59**.

|                                   |                                                                                                   |
|-----------------------------------|---------------------------------------------------------------------------------------------------|
| Identification code               | p17139                                                                                            |
| Empirical formula                 | C <sub>19</sub> H <sub>22</sub> O <sub>5</sub>                                                    |
| Formula weight                    | 330.36                                                                                            |
| Temperature                       | 100 K                                                                                             |
| Wavelength                        | 1.54178 Å                                                                                         |
| Crystal system                    | Monoclinic                                                                                        |
| Space group                       | C 1 2 1                                                                                           |
| Unit cell dimensions              | a = 22.5468(19) Å    α = 90°<br>b = 10.4722(9) Å    β = 107.751(5)°<br>c = 7.3277(5) Å    γ = 90° |
| Volume                            | 1647.8(2) Å <sup>3</sup>                                                                          |
| Z                                 | 4                                                                                                 |
| Density (calculated)              | 1.332 Mg/m <sup>3</sup>                                                                           |
| Absorption coefficient            | 0.787 mm <sup>-1</sup>                                                                            |
| F(000)                            | 704                                                                                               |
| Crystal size                      | 0.32 x 0.13 x 0.06 mm <sup>3</sup>                                                                |
| Theta range for data collection   | 4.698 to 79.209°.                                                                                 |
| Index ranges                      | -28 ≤ h ≤ 28, -12 ≤ k ≤ 13, -9 ≤ l ≤ 9                                                            |
| Reflections collected             | 19495                                                                                             |
| Independent reflections           | 3531 [R(int) = 0.0367]                                                                            |
| Completeness to theta =           | 67.000° 99.9 %                                                                                    |
| Absorption correction             | Semi-empirical from equivalents                                                                   |
| Max. and min. transmission        | 1.0000 and 0.8733                                                                                 |
| Refinement method                 | Full-matrix least-squares on F <sup>2</sup>                                                       |
| Data / restraints / parameters    | 3531 / 1 / 240                                                                                    |
| Goodness-of-fit on F <sup>2</sup> | 1.048                                                                                             |
| Final R indices                   | [I > 2σ(I)] R <sub>1</sub> = 0.0274, wR <sub>2</sub> = 0.0697                                     |
| R indices (all data)              | R <sub>1</sub> = 0.0277, wR <sub>2</sub> = 0.0699                                                 |
| Absolute structure parameter      | 0.06(4)                                                                                           |
| Extinction coefficient            | n/a                                                                                               |
| Largest diff. peak and hole       | 0.212 and -0.159 e.Å <sup>-3</sup>                                                                |

---

**7. Notes & References**

1. Sheldrick, G. M. *Acta Cryst.* **1990**, A46, 467–473.
2. Sheldrick, G. M. *Acta Cryst.* **2008**, A64, 112–122.
3. Müller, P. *Crystallography Reviews* **2009**, 15, 57–83.
